# Supplementary material
Source: publisher figshare collection journal article supplement (https://frontiersin.figshare.com/ndownloader/files/28109268)

Fig.1D

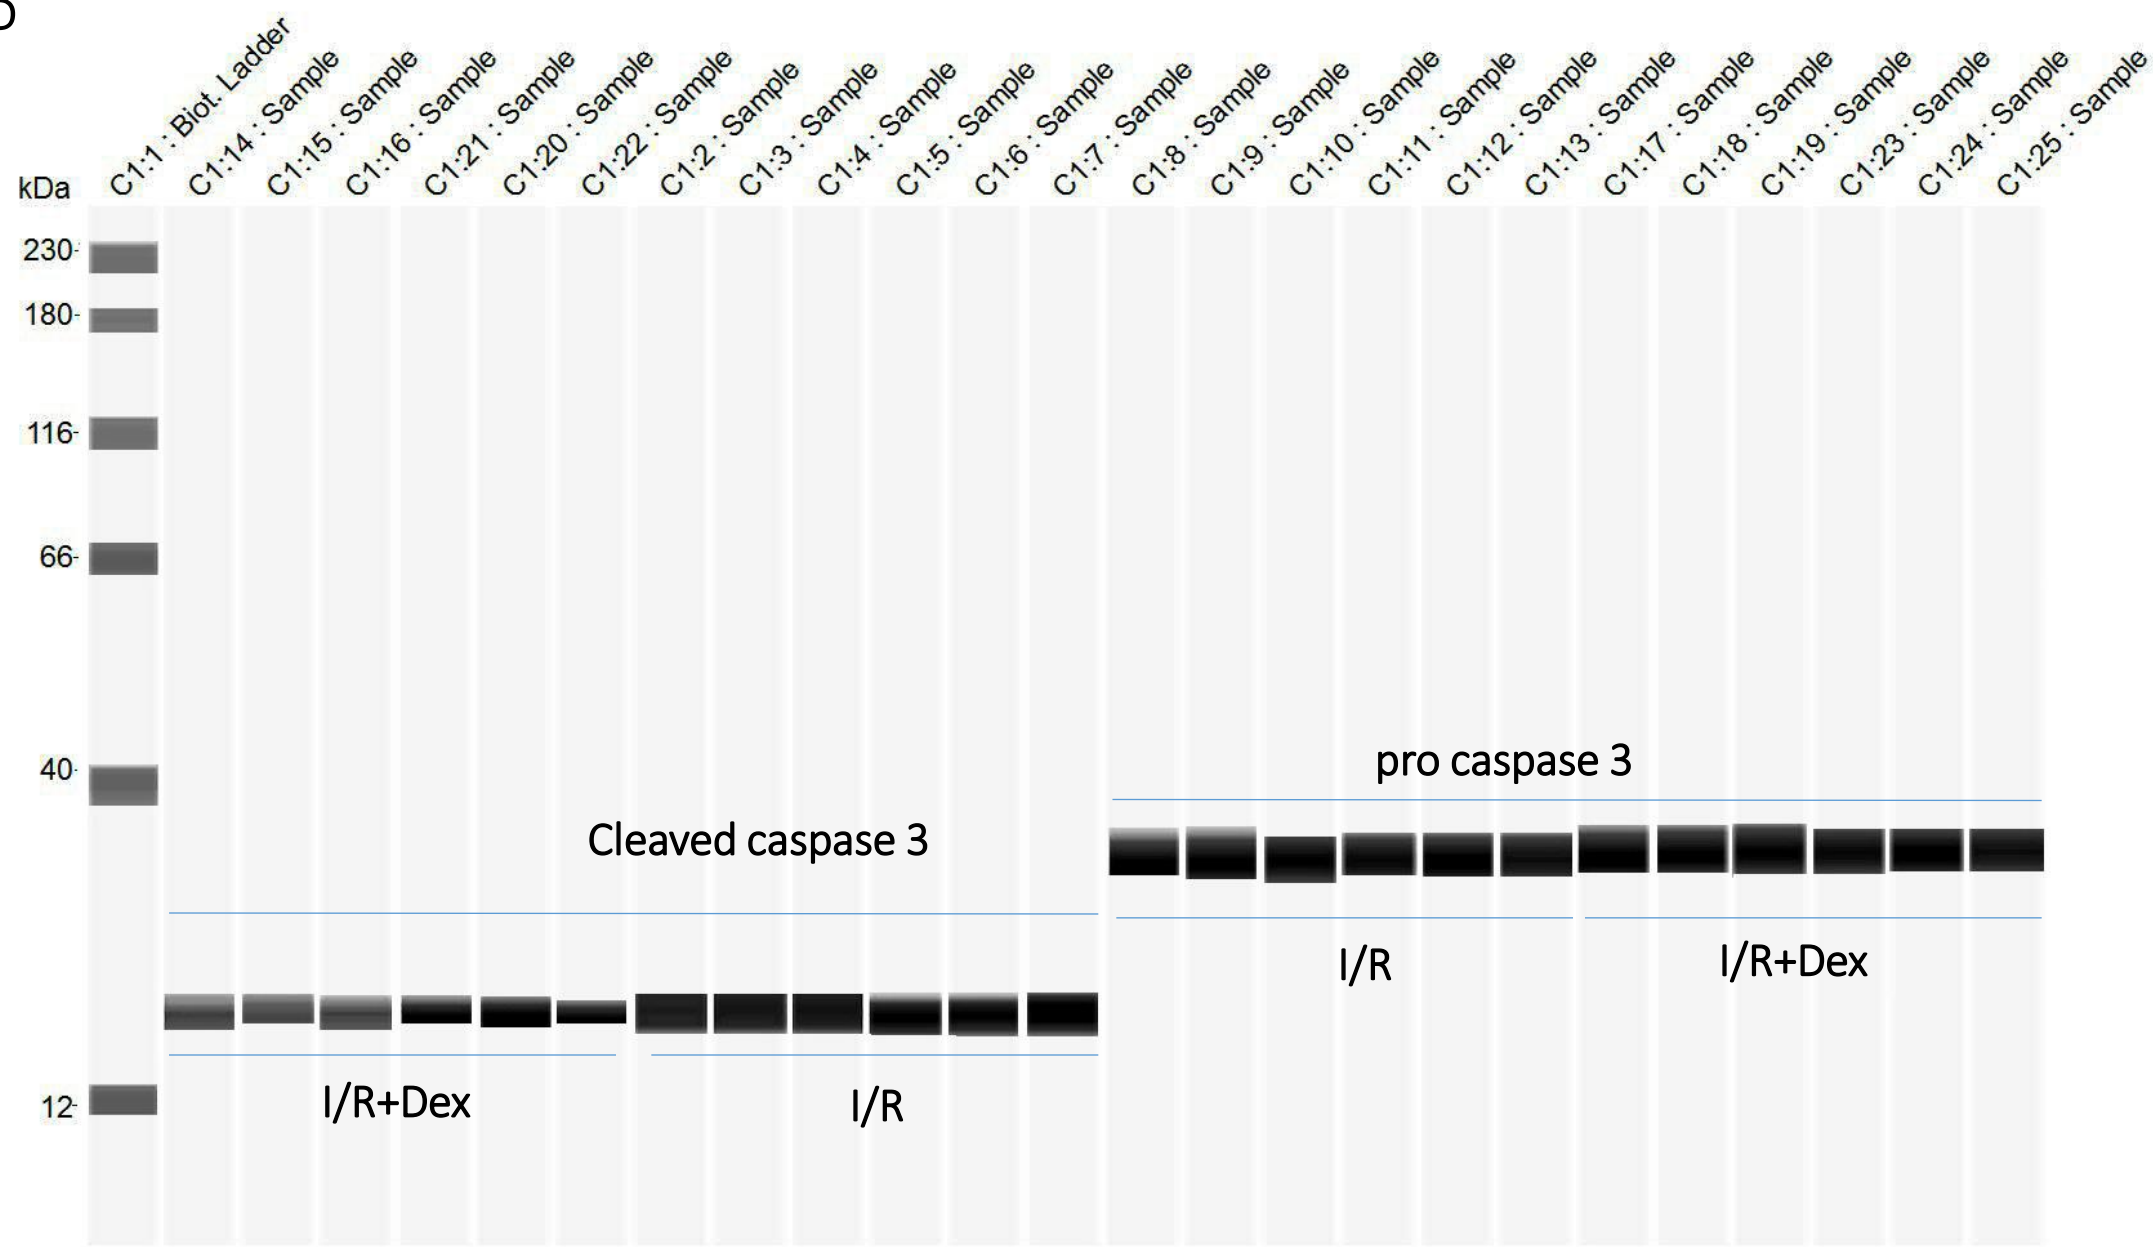

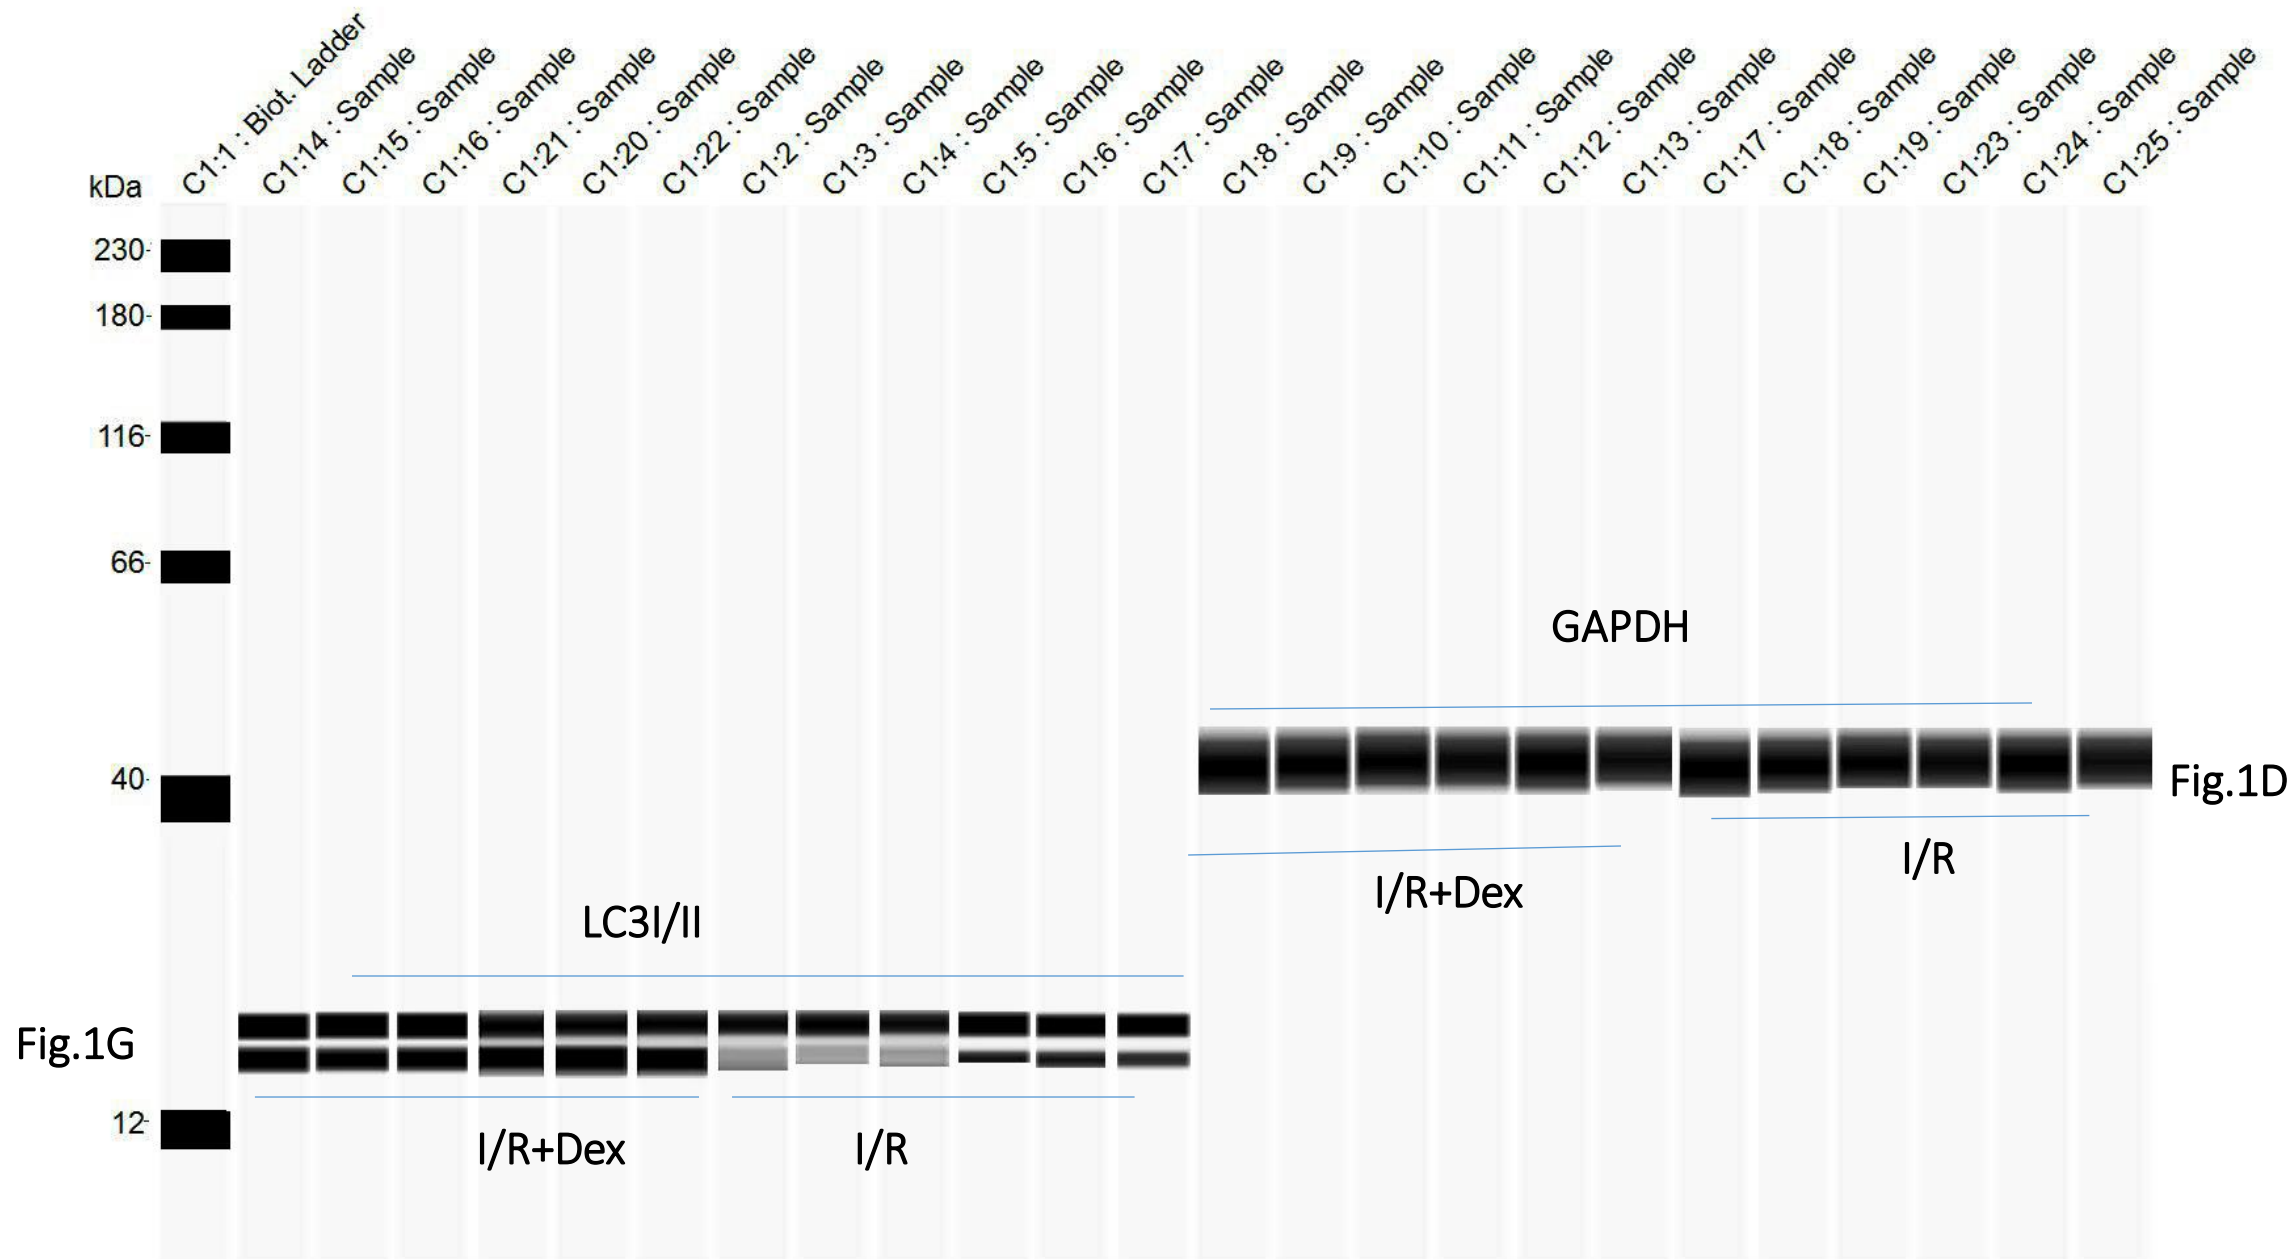

Fig.1G

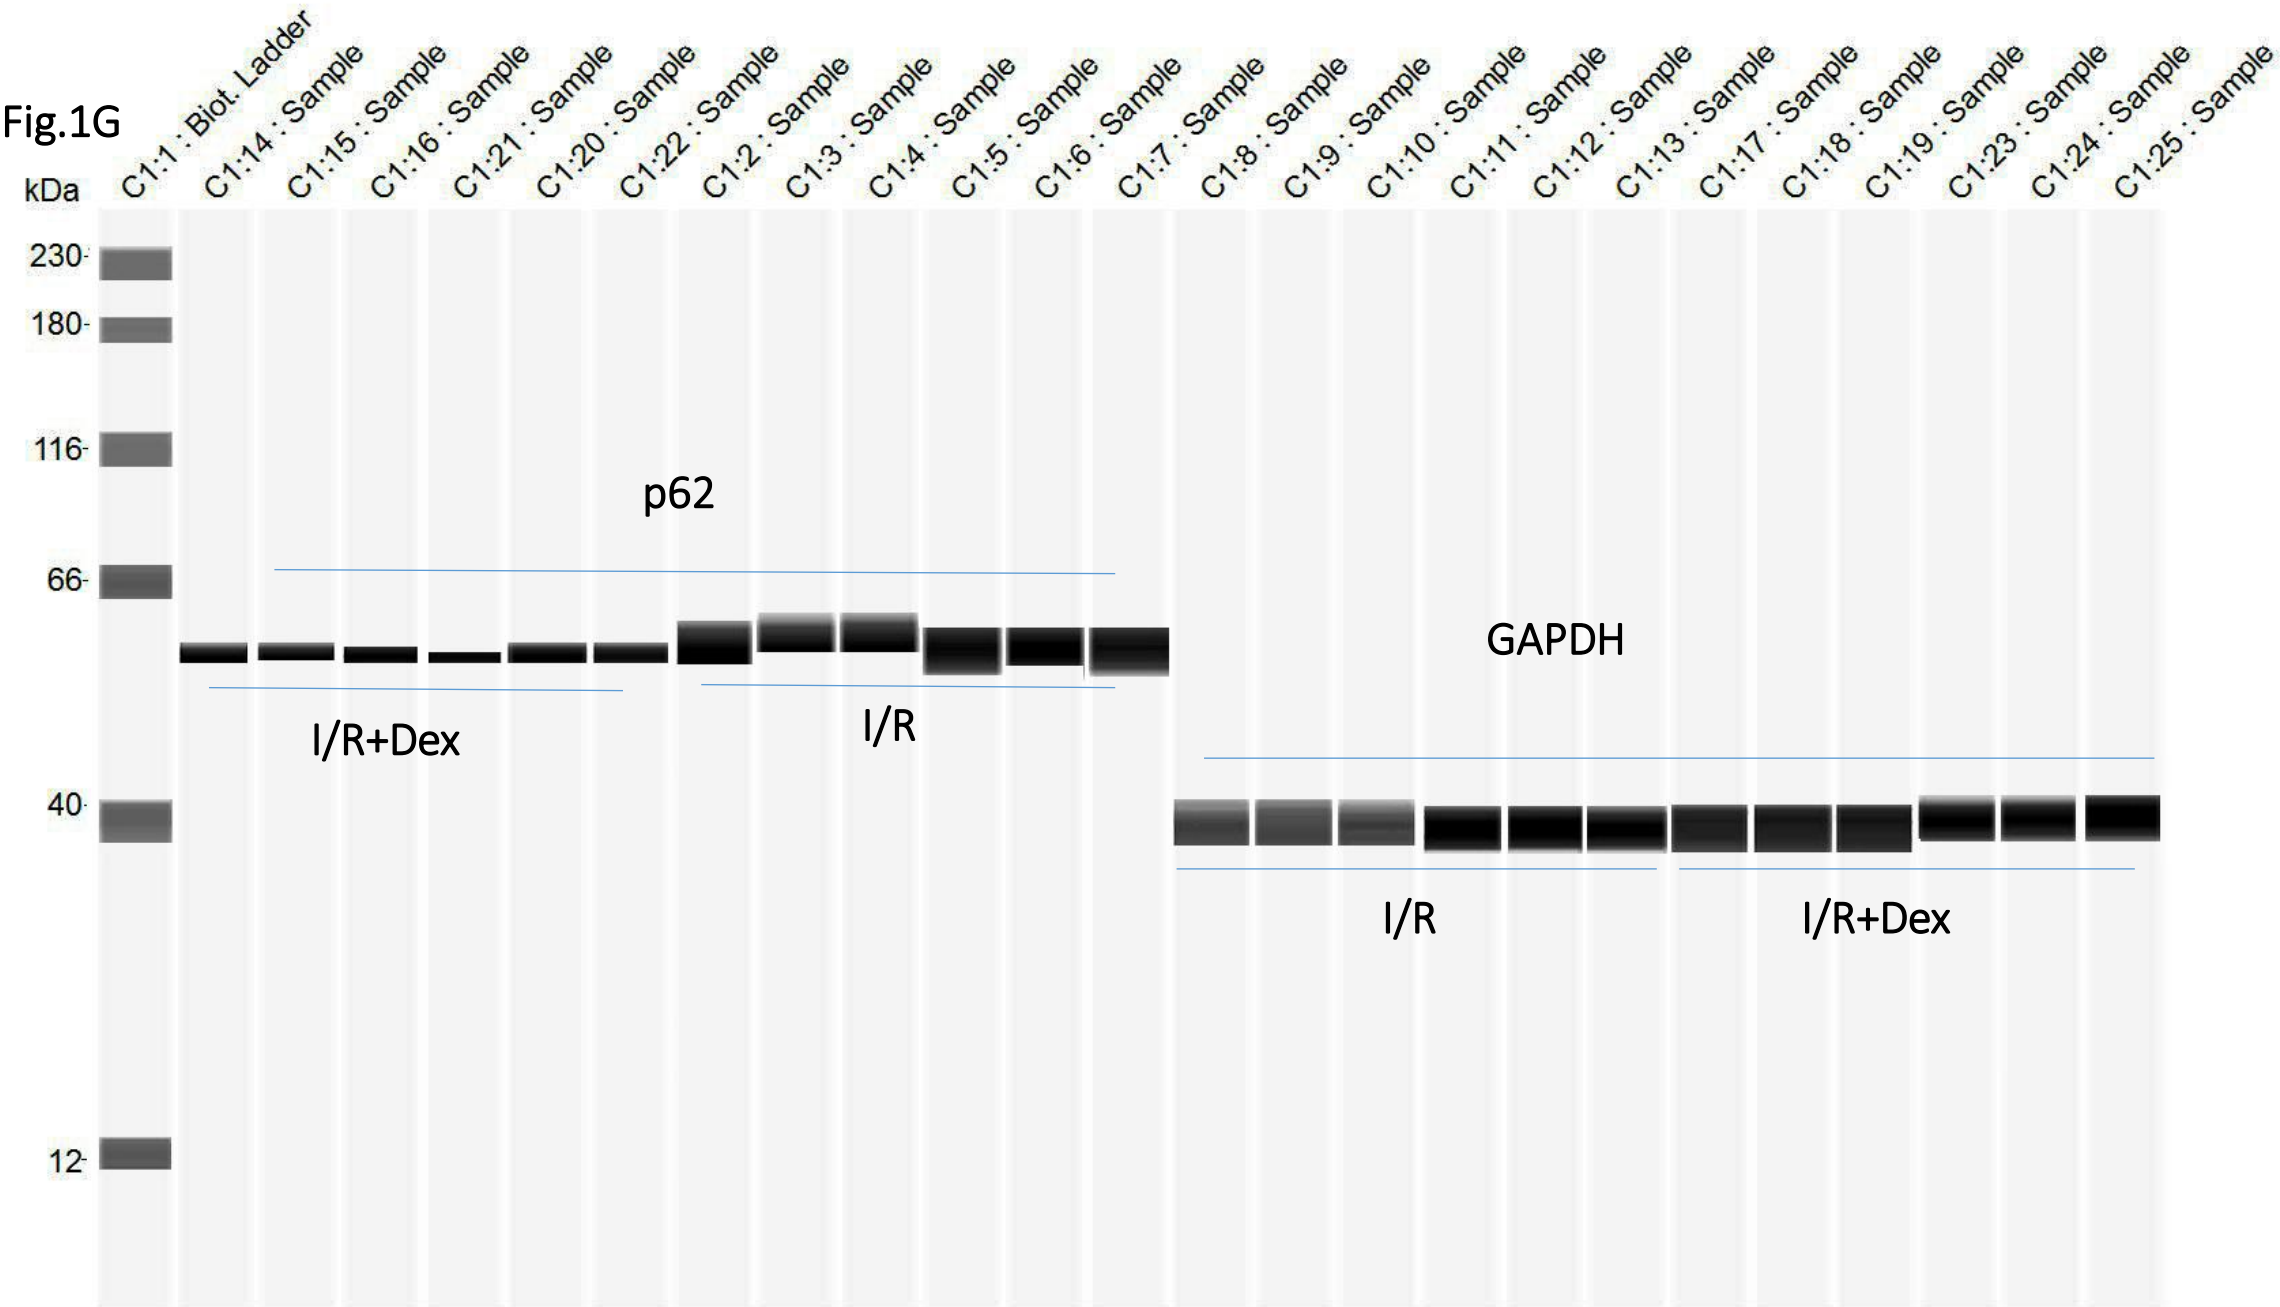

Fig.2D

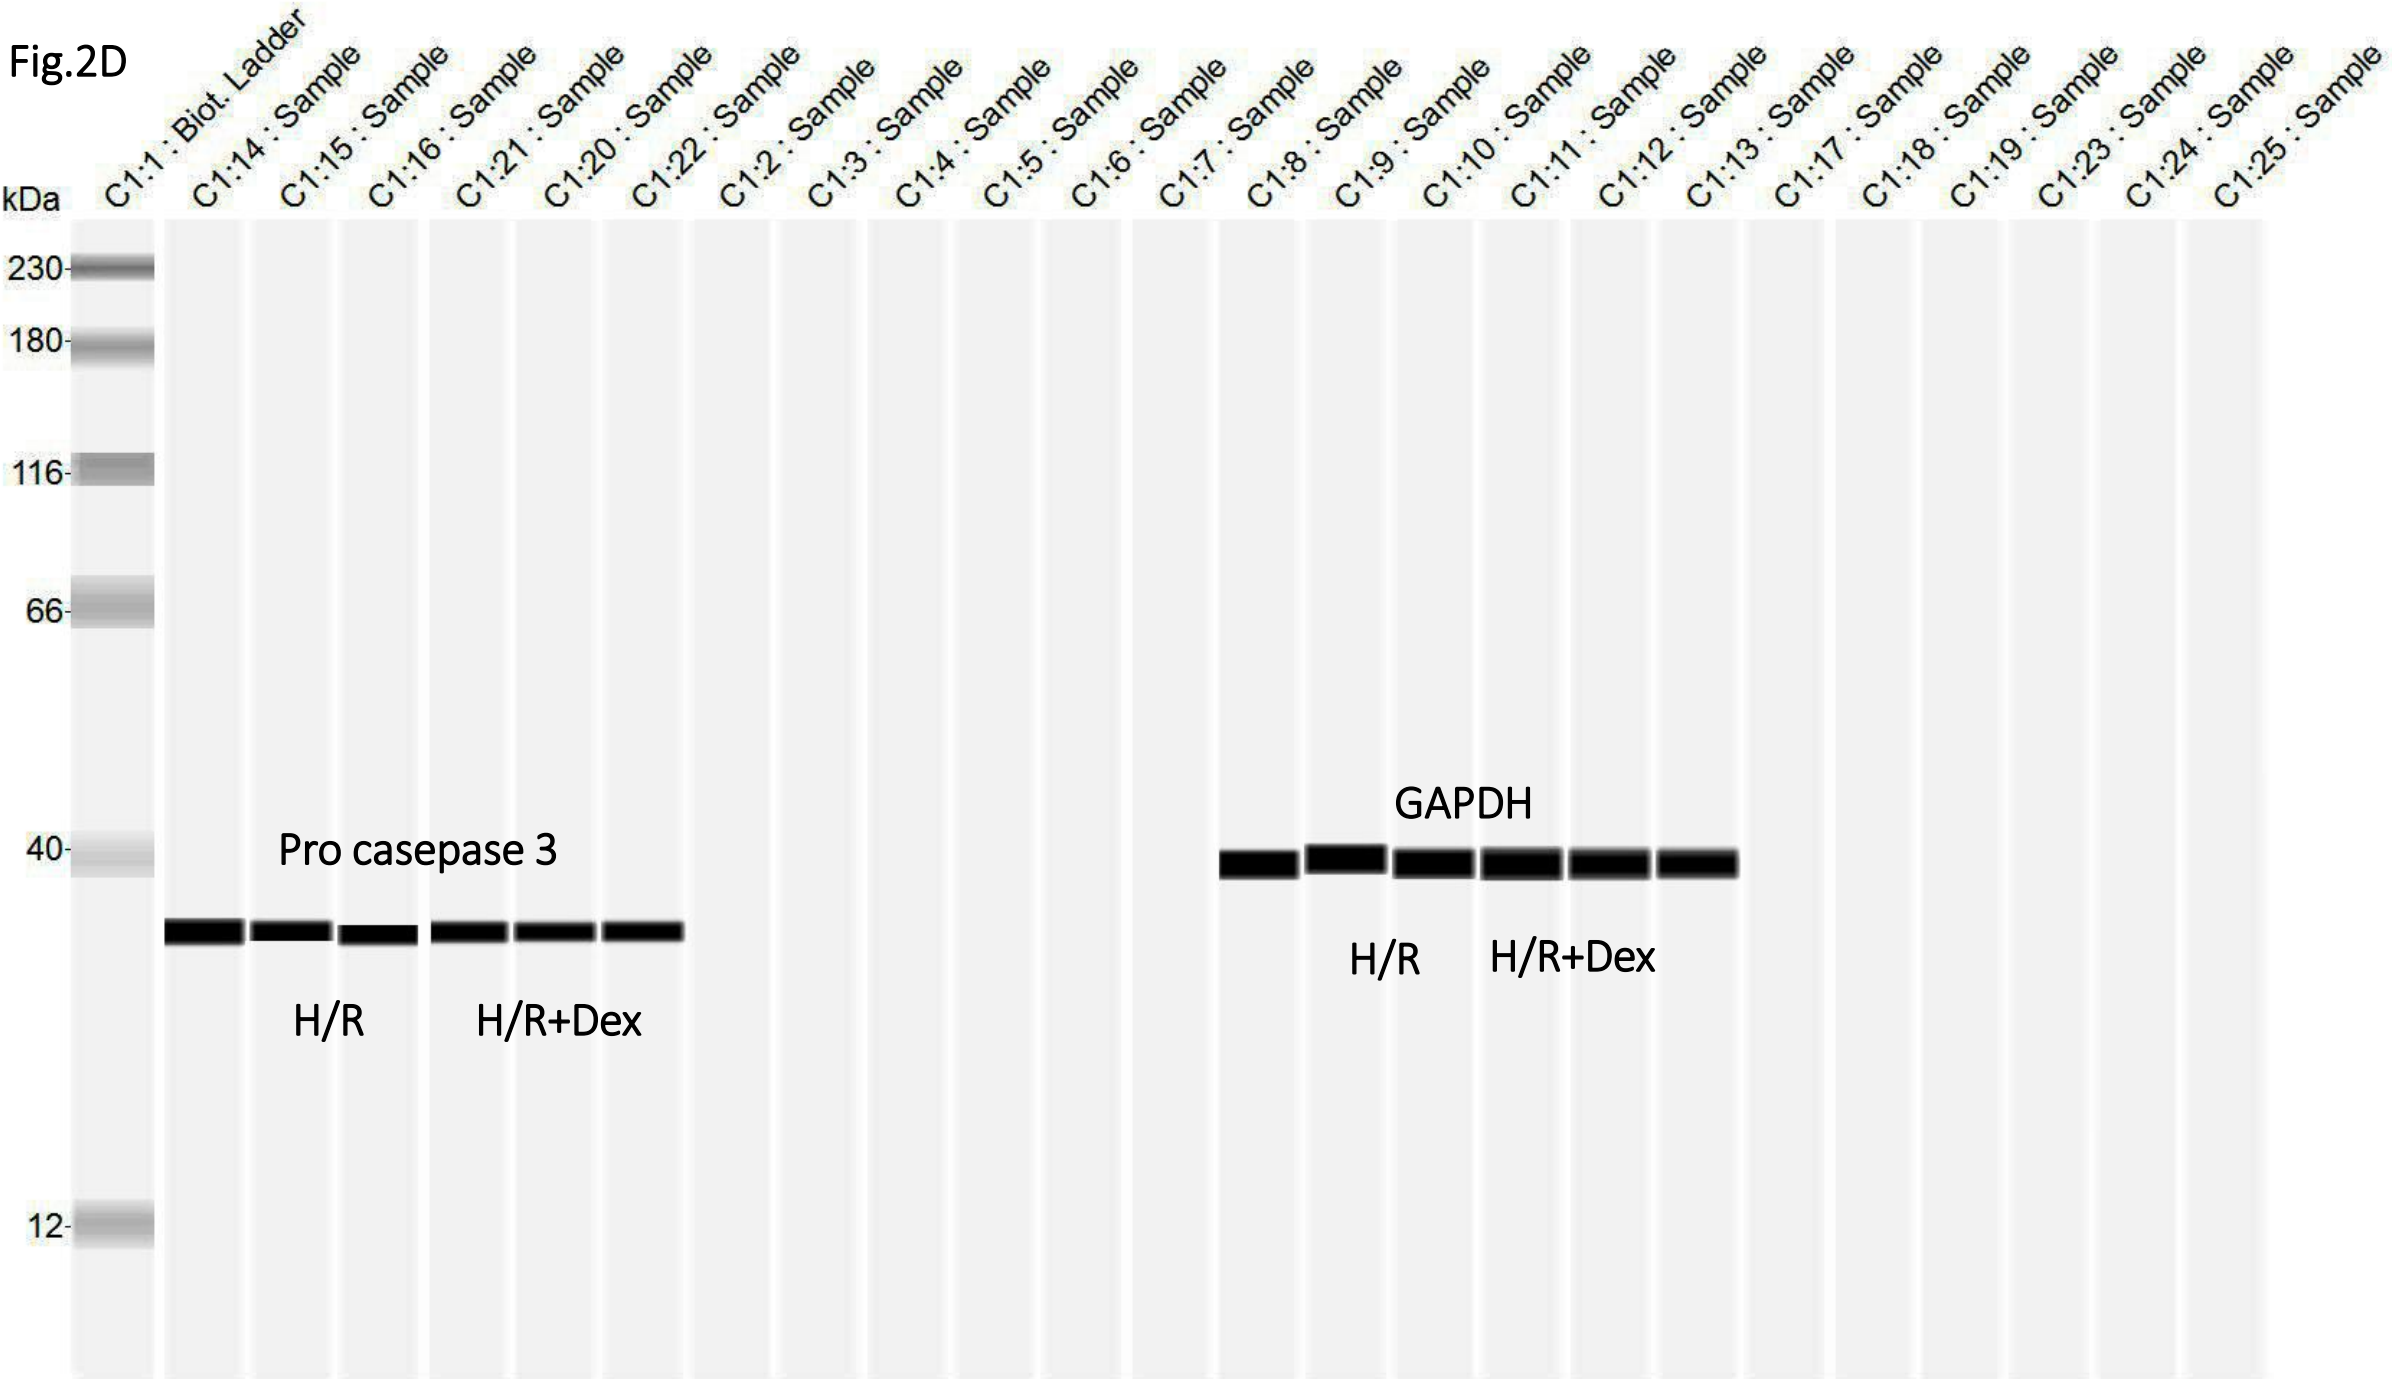

Fig.2G

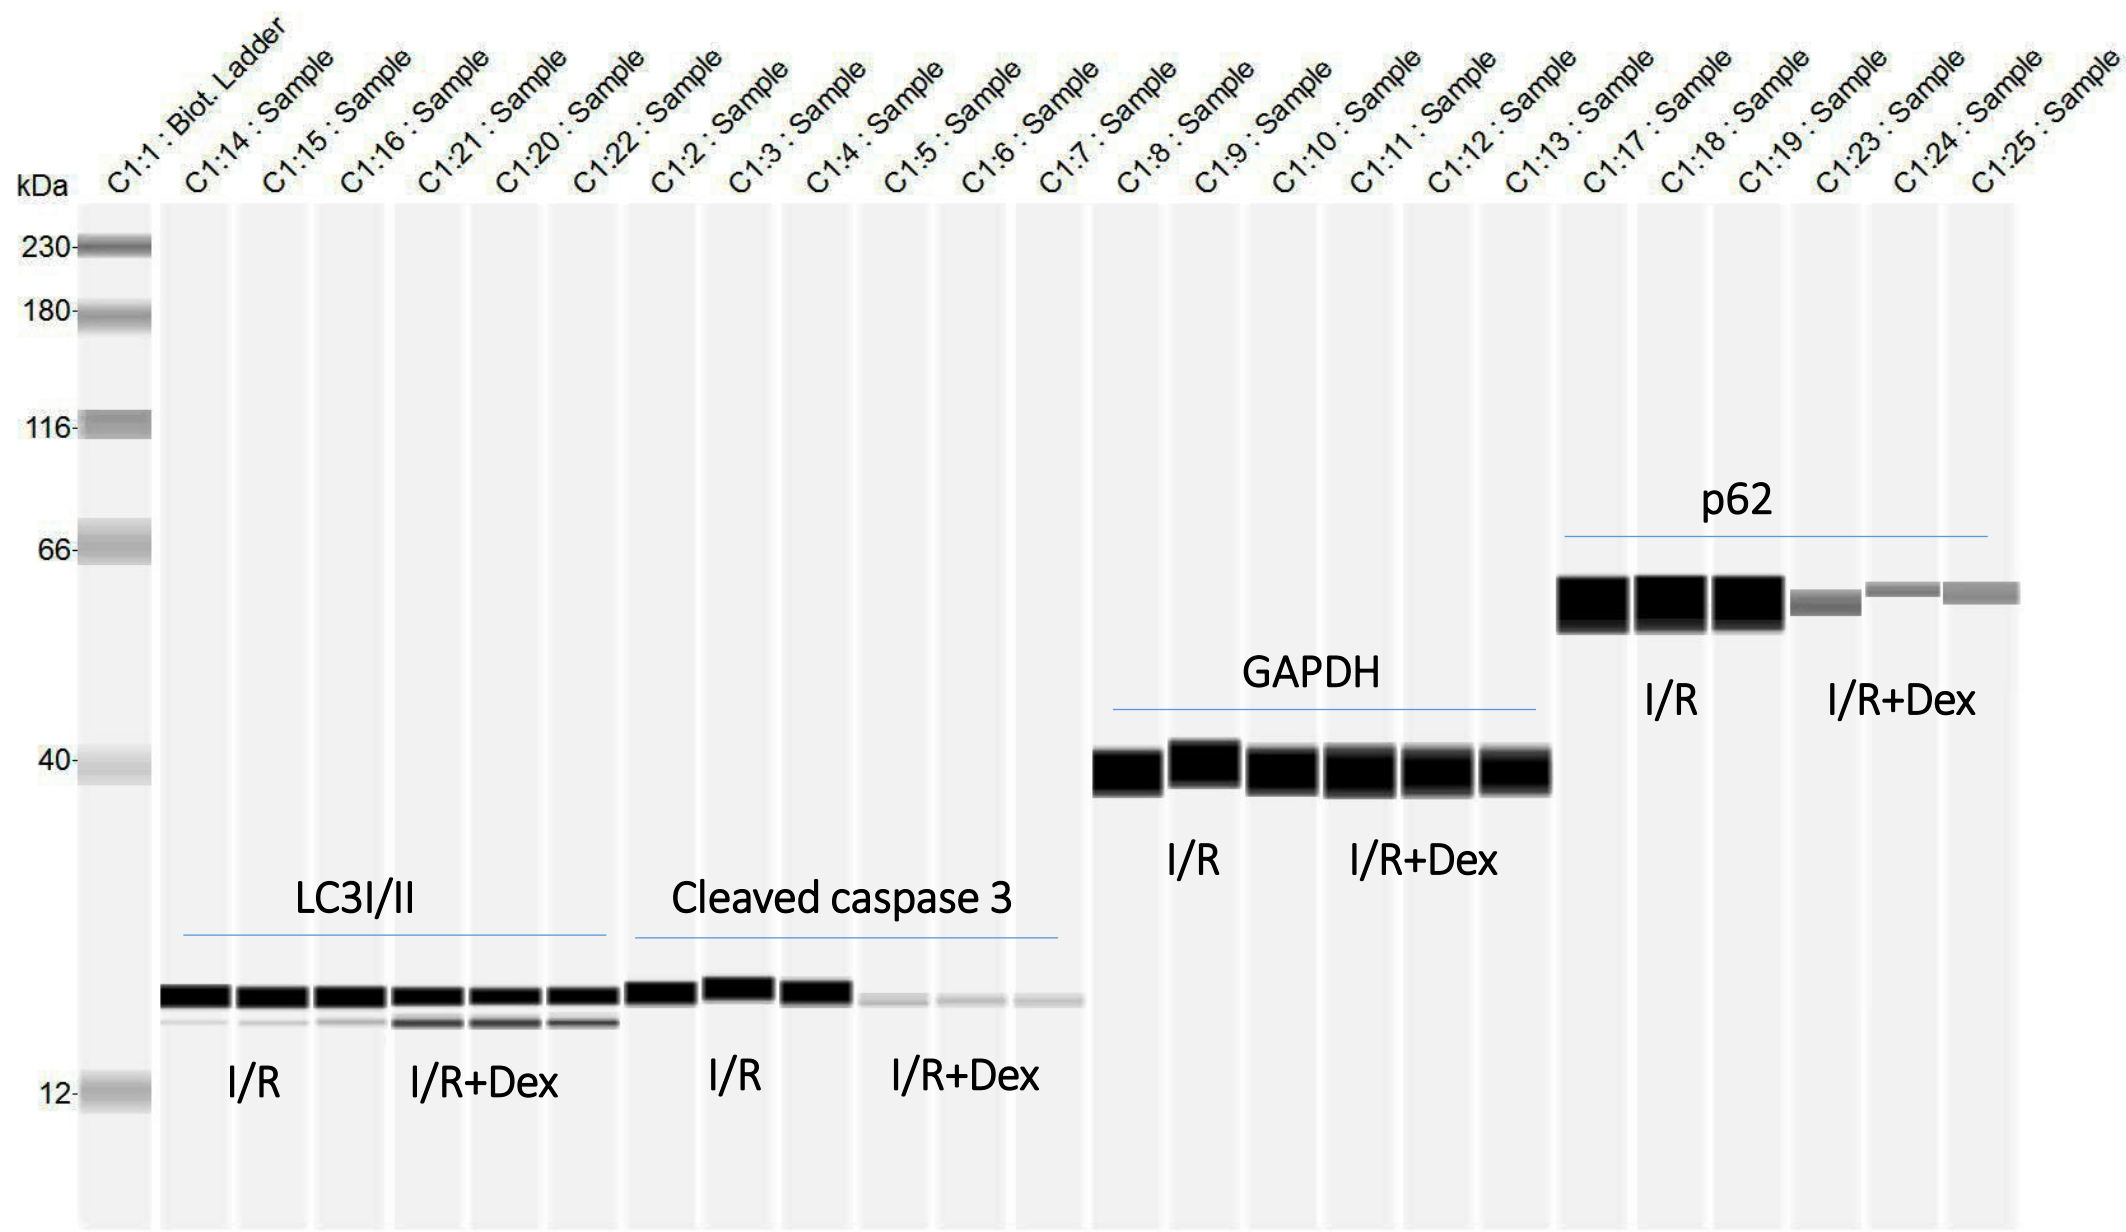

Fig.3A

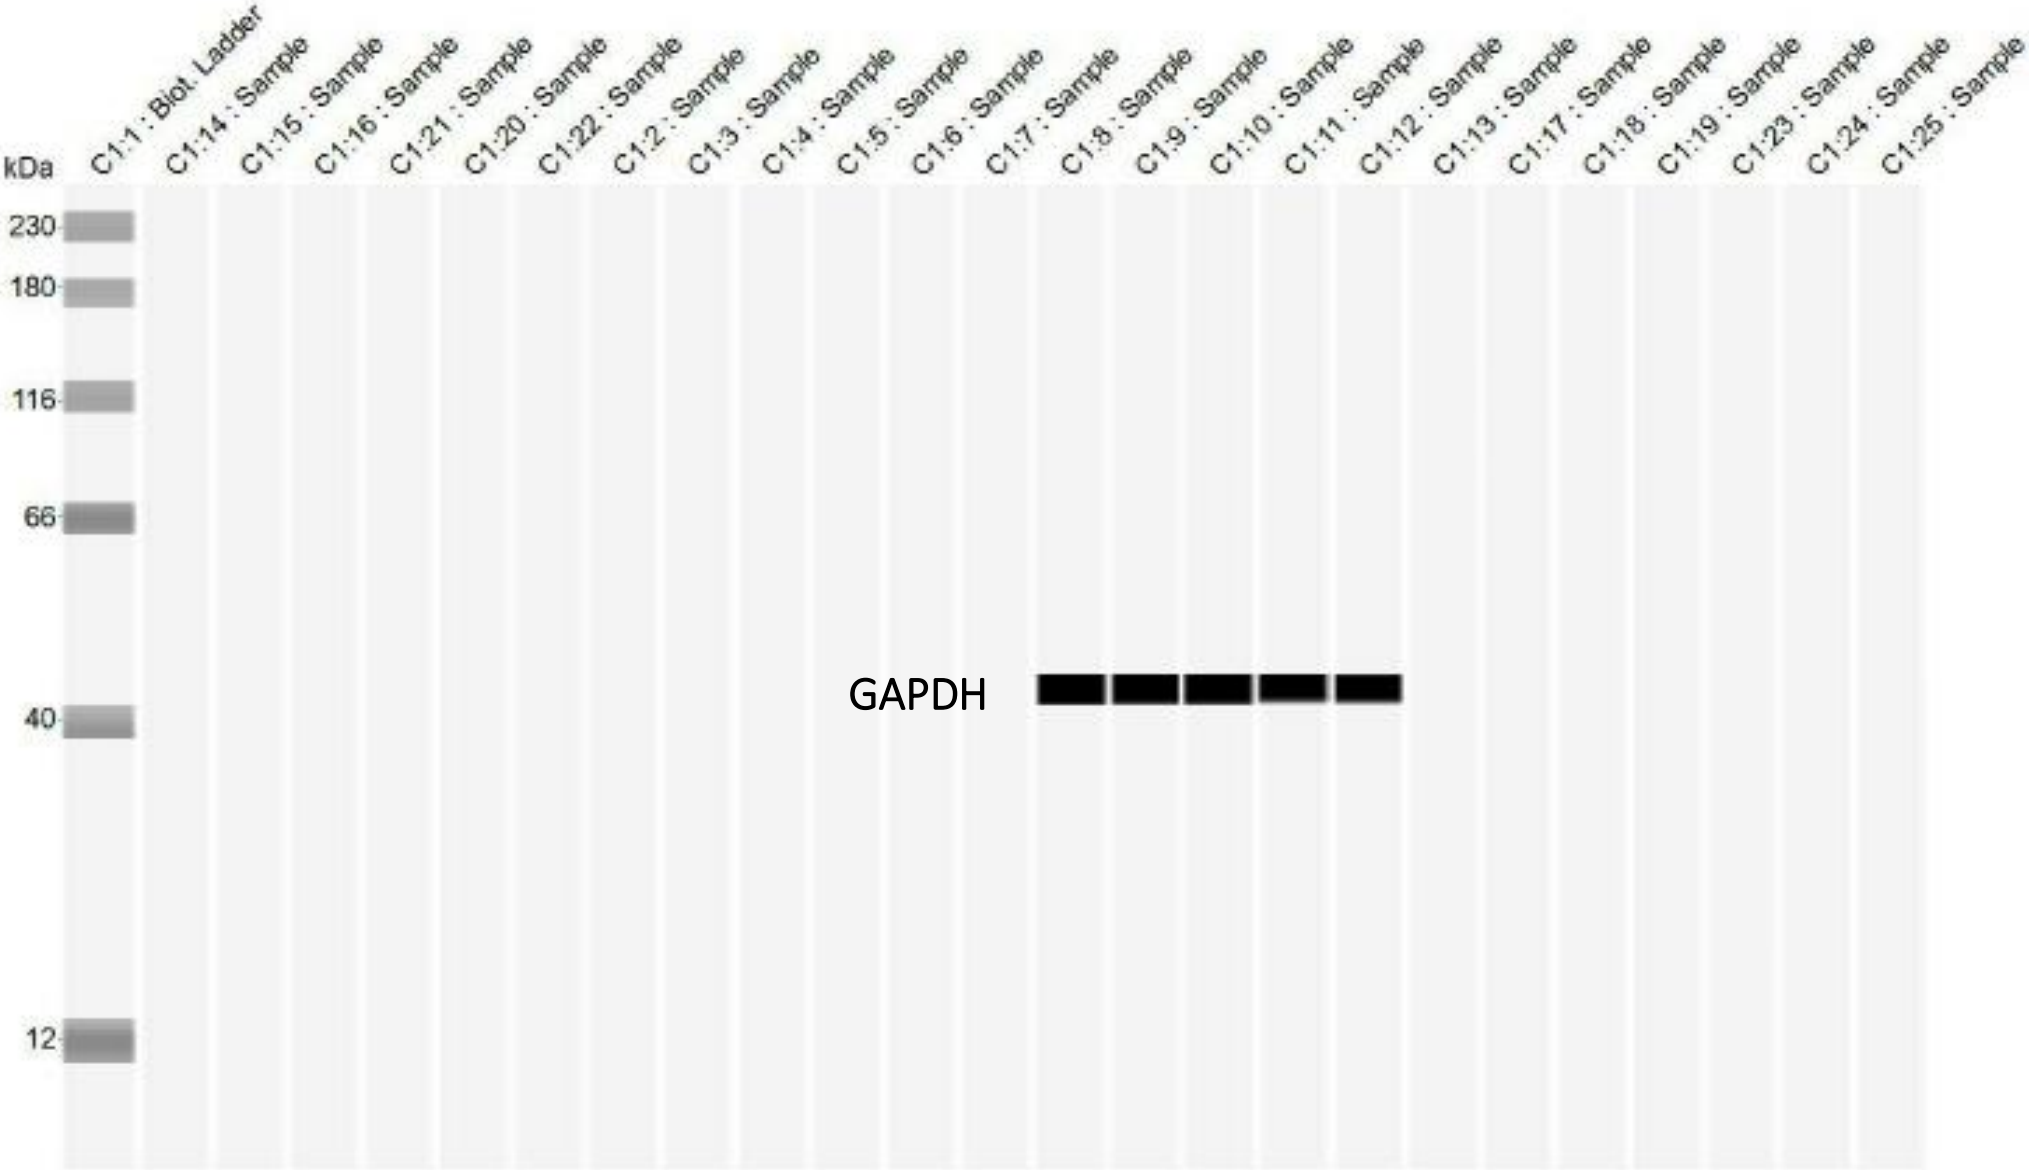

Fig.3A

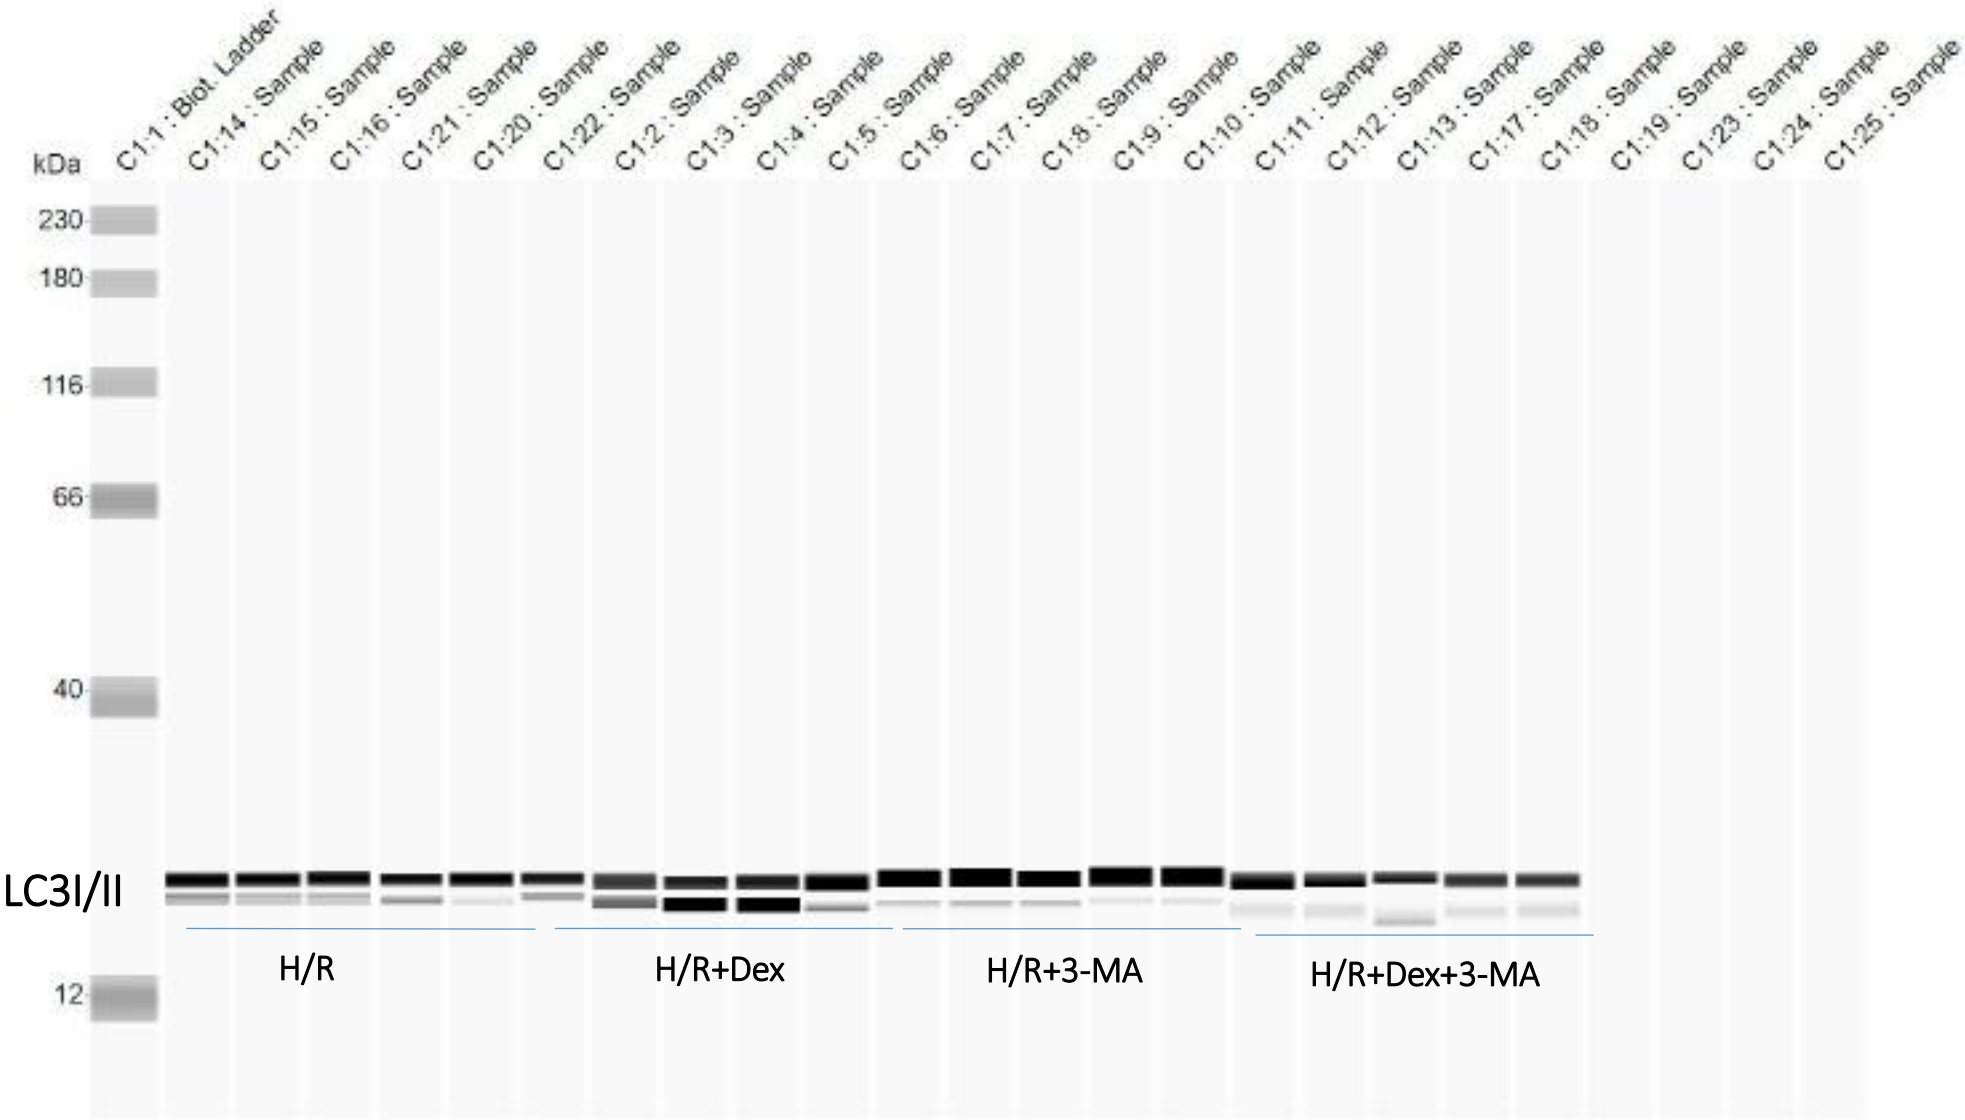



Fig.3C

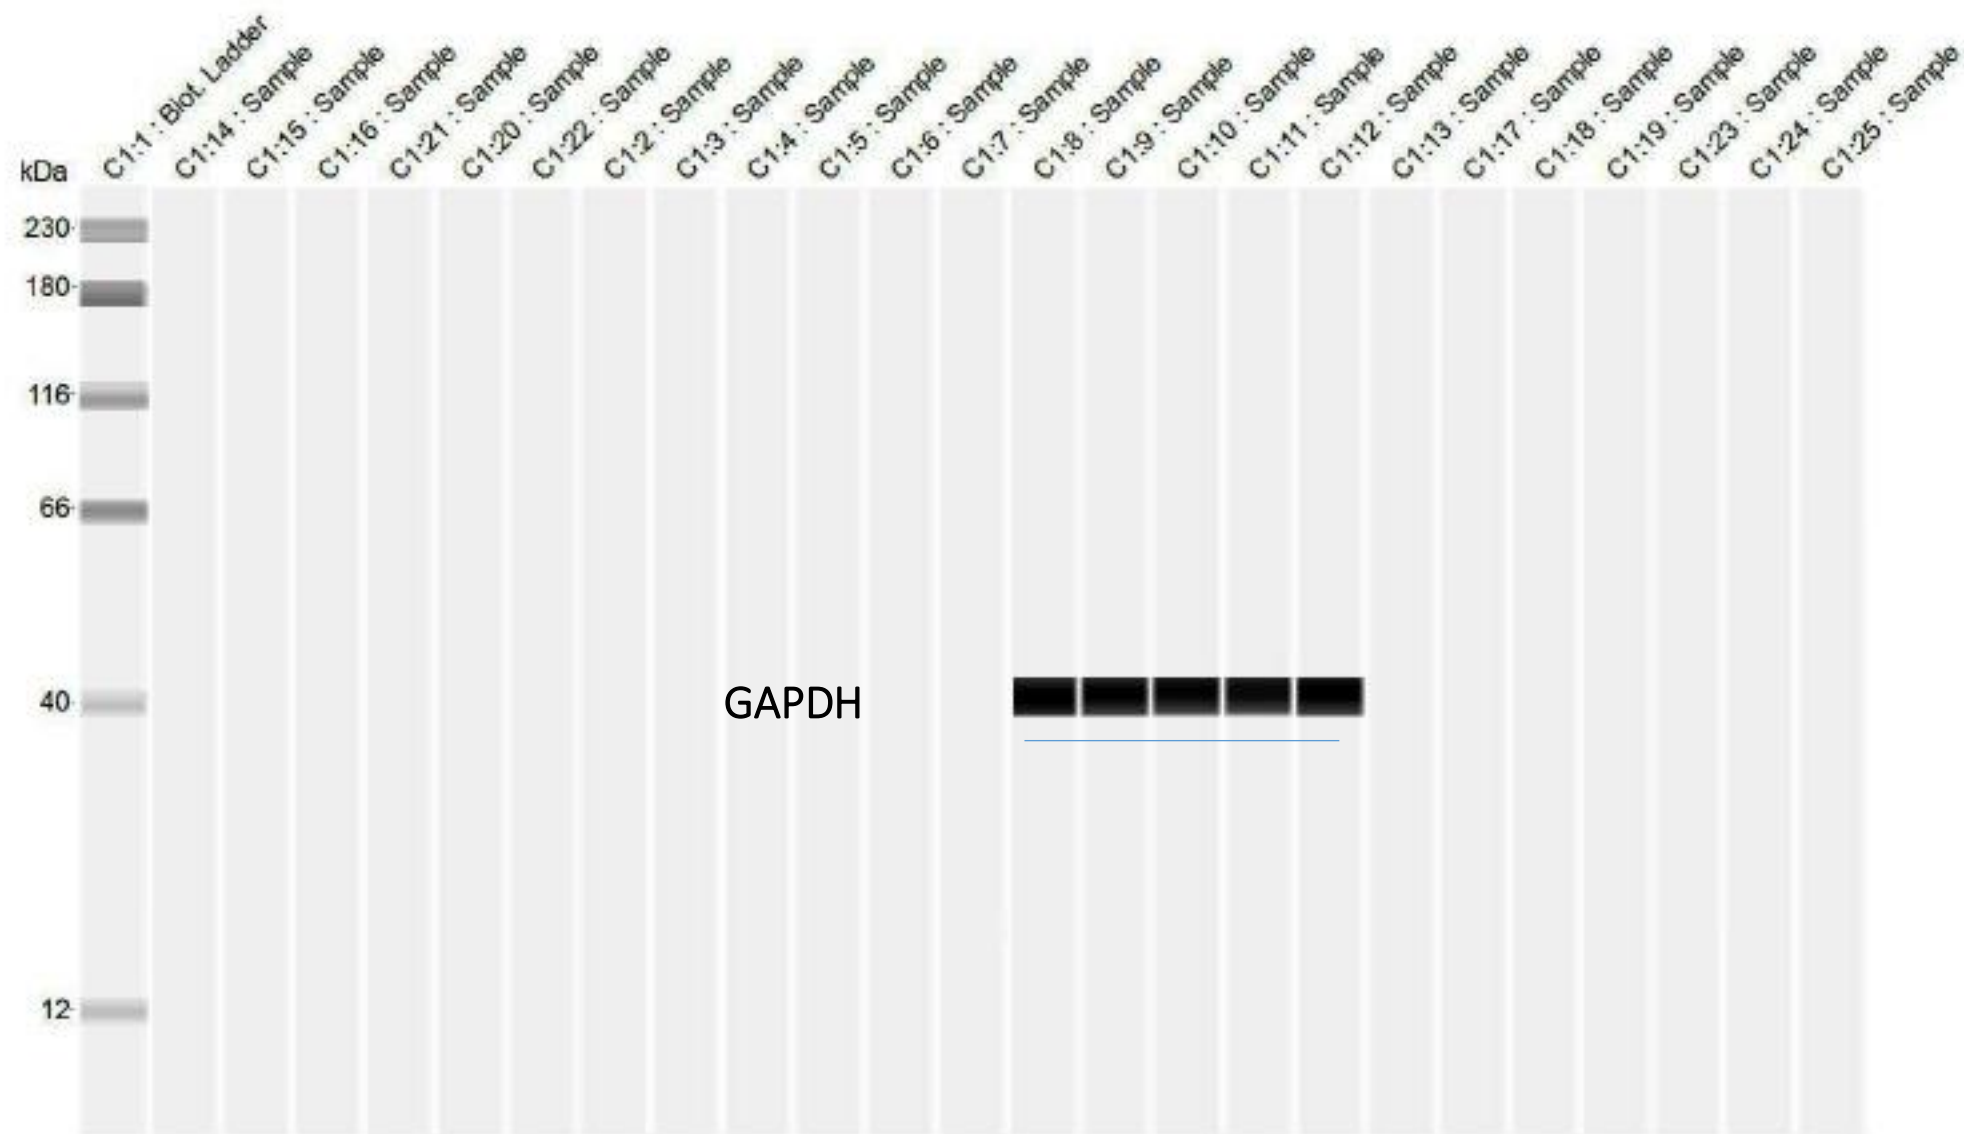



Fig.3C

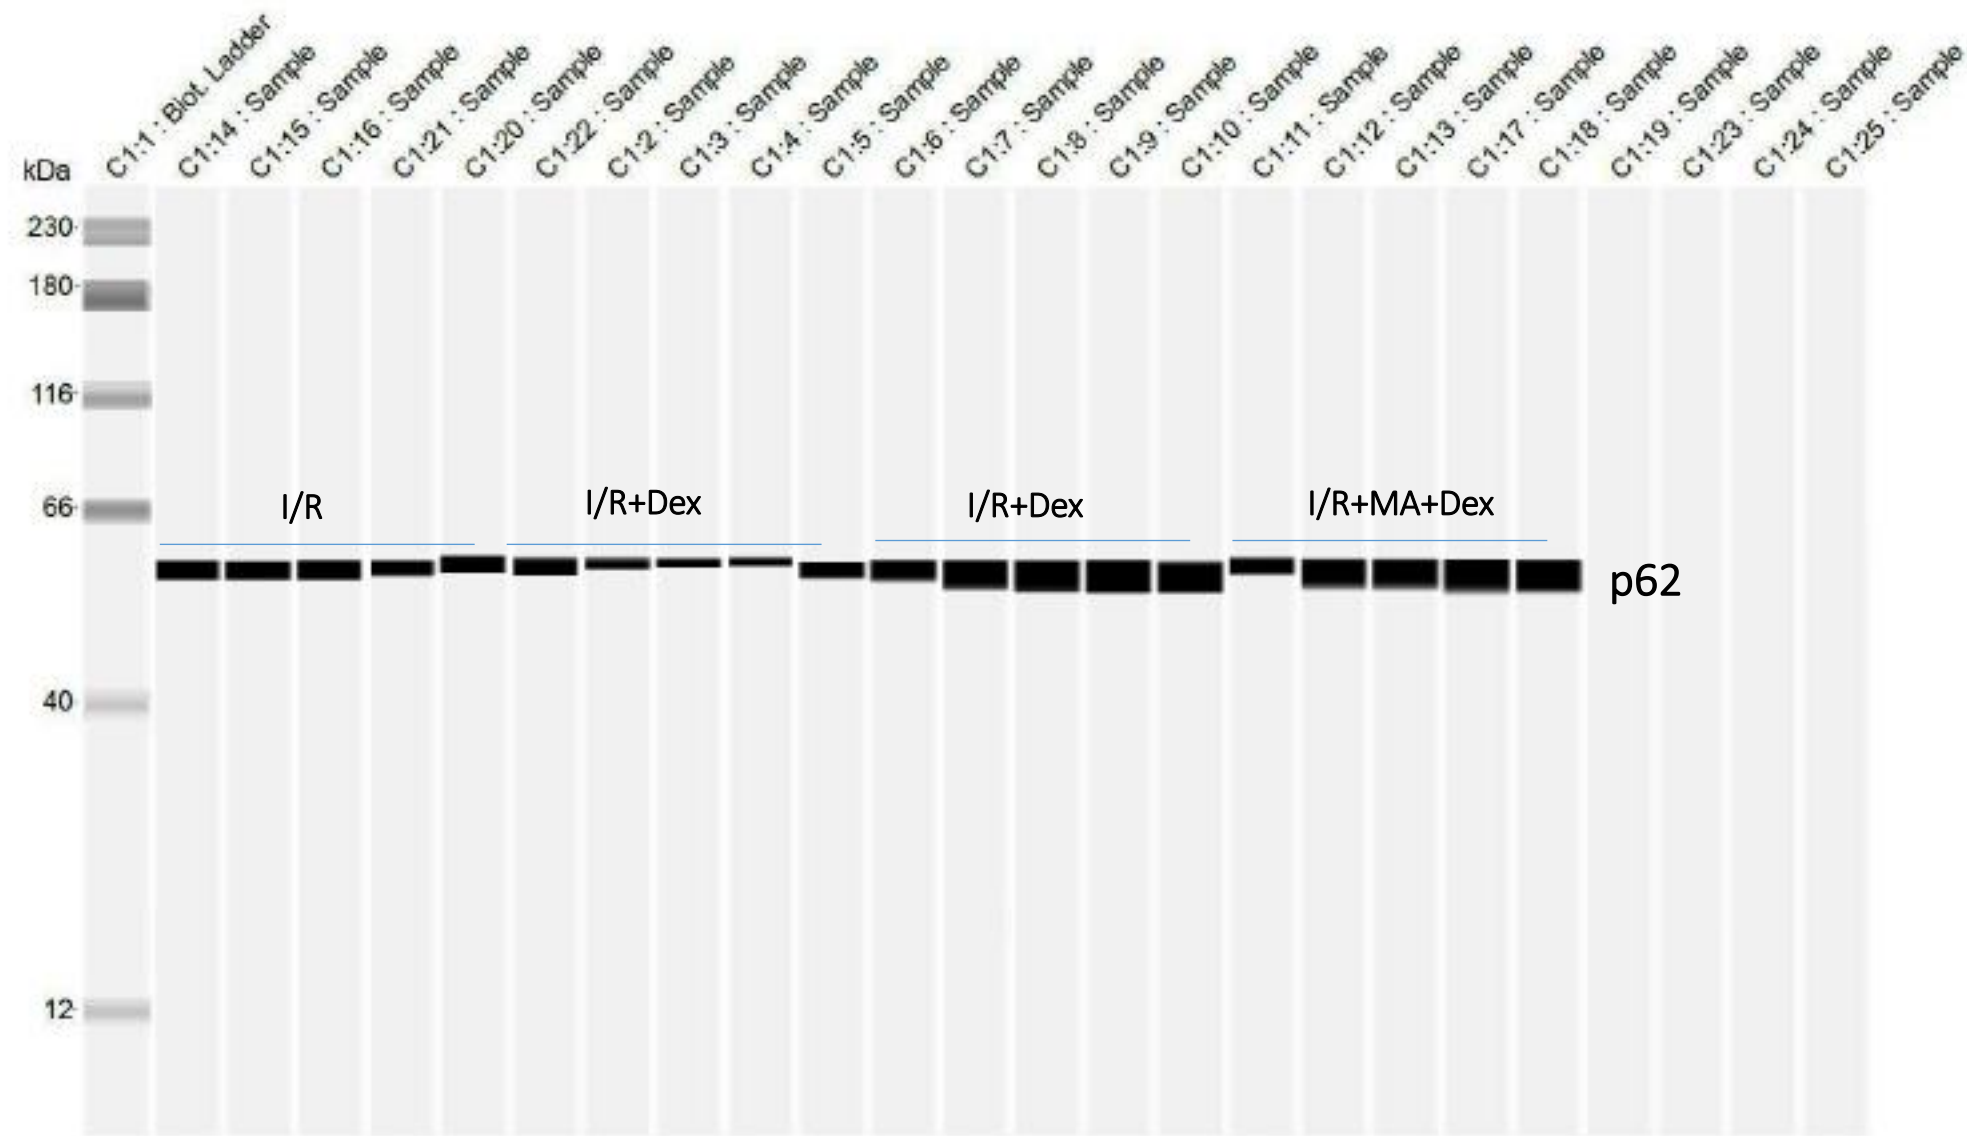

Fig.4C

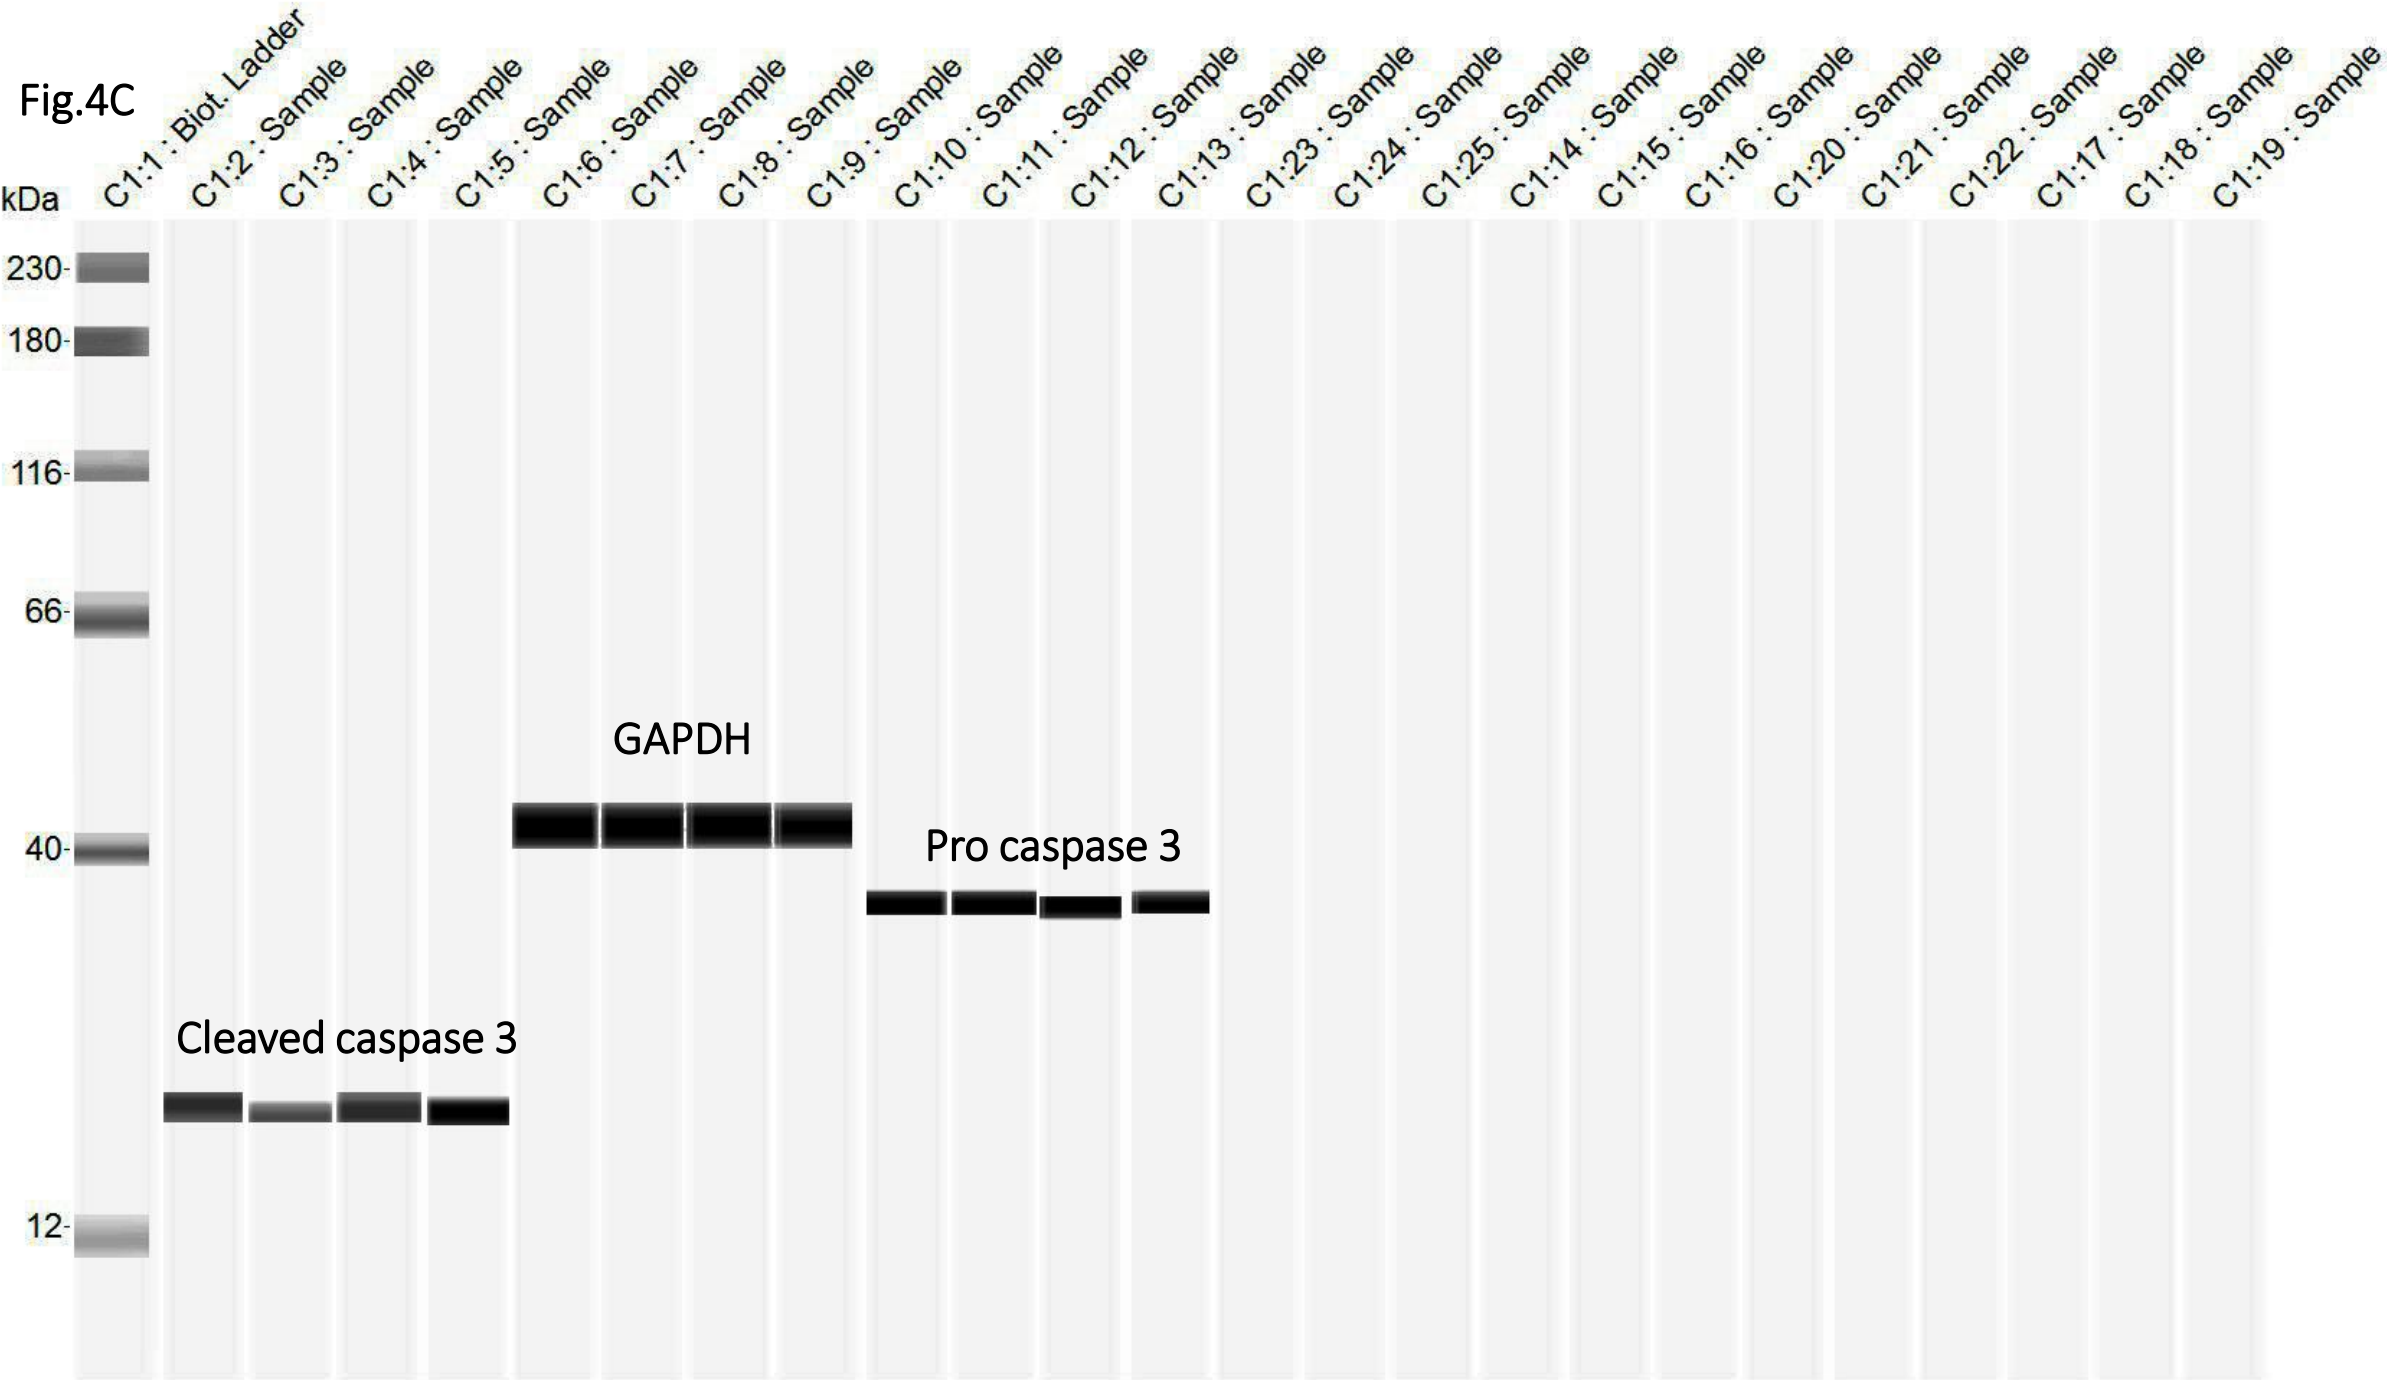

Fig.5A

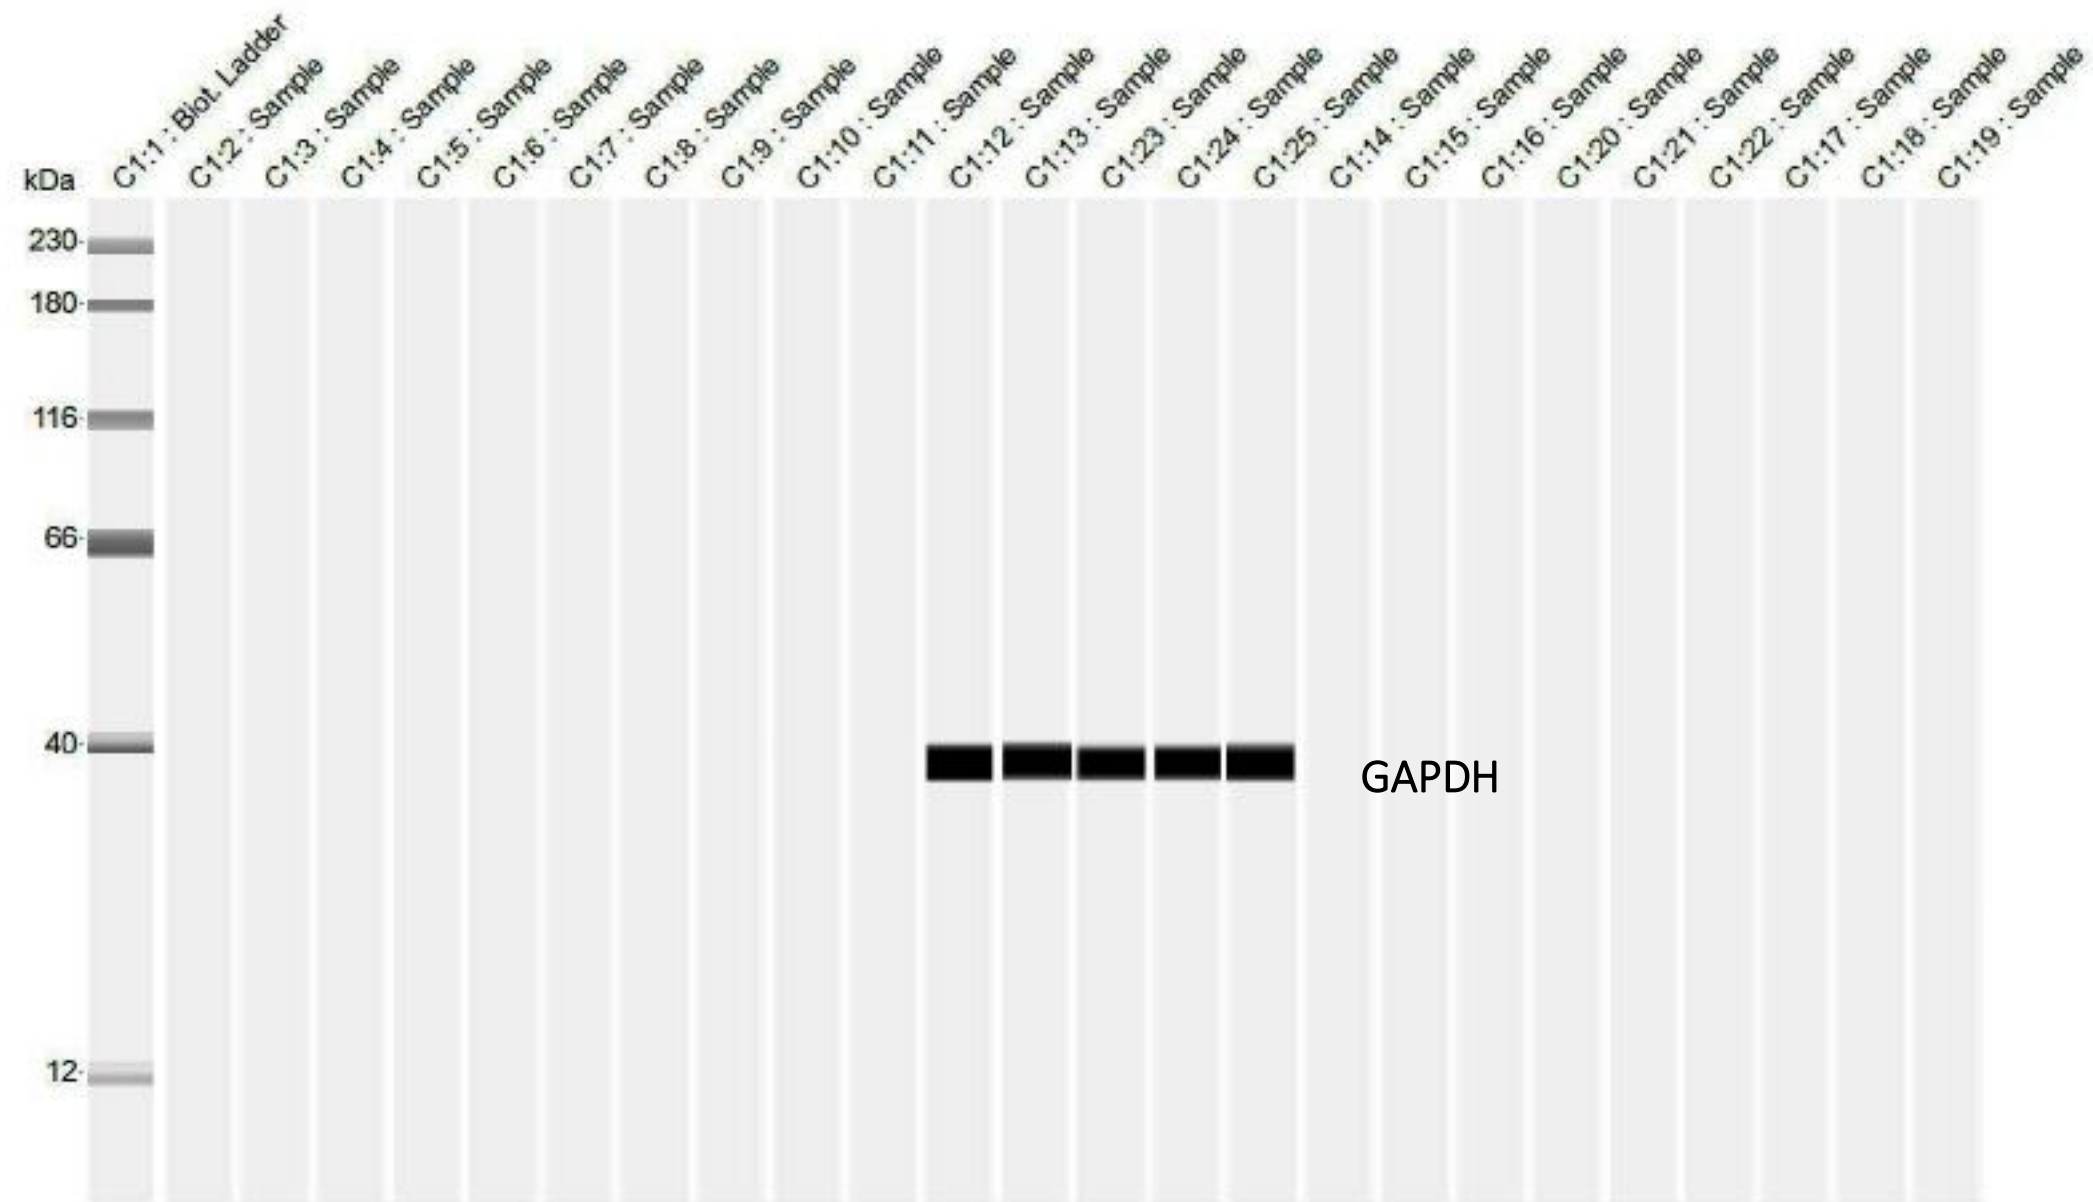

Fig.5A

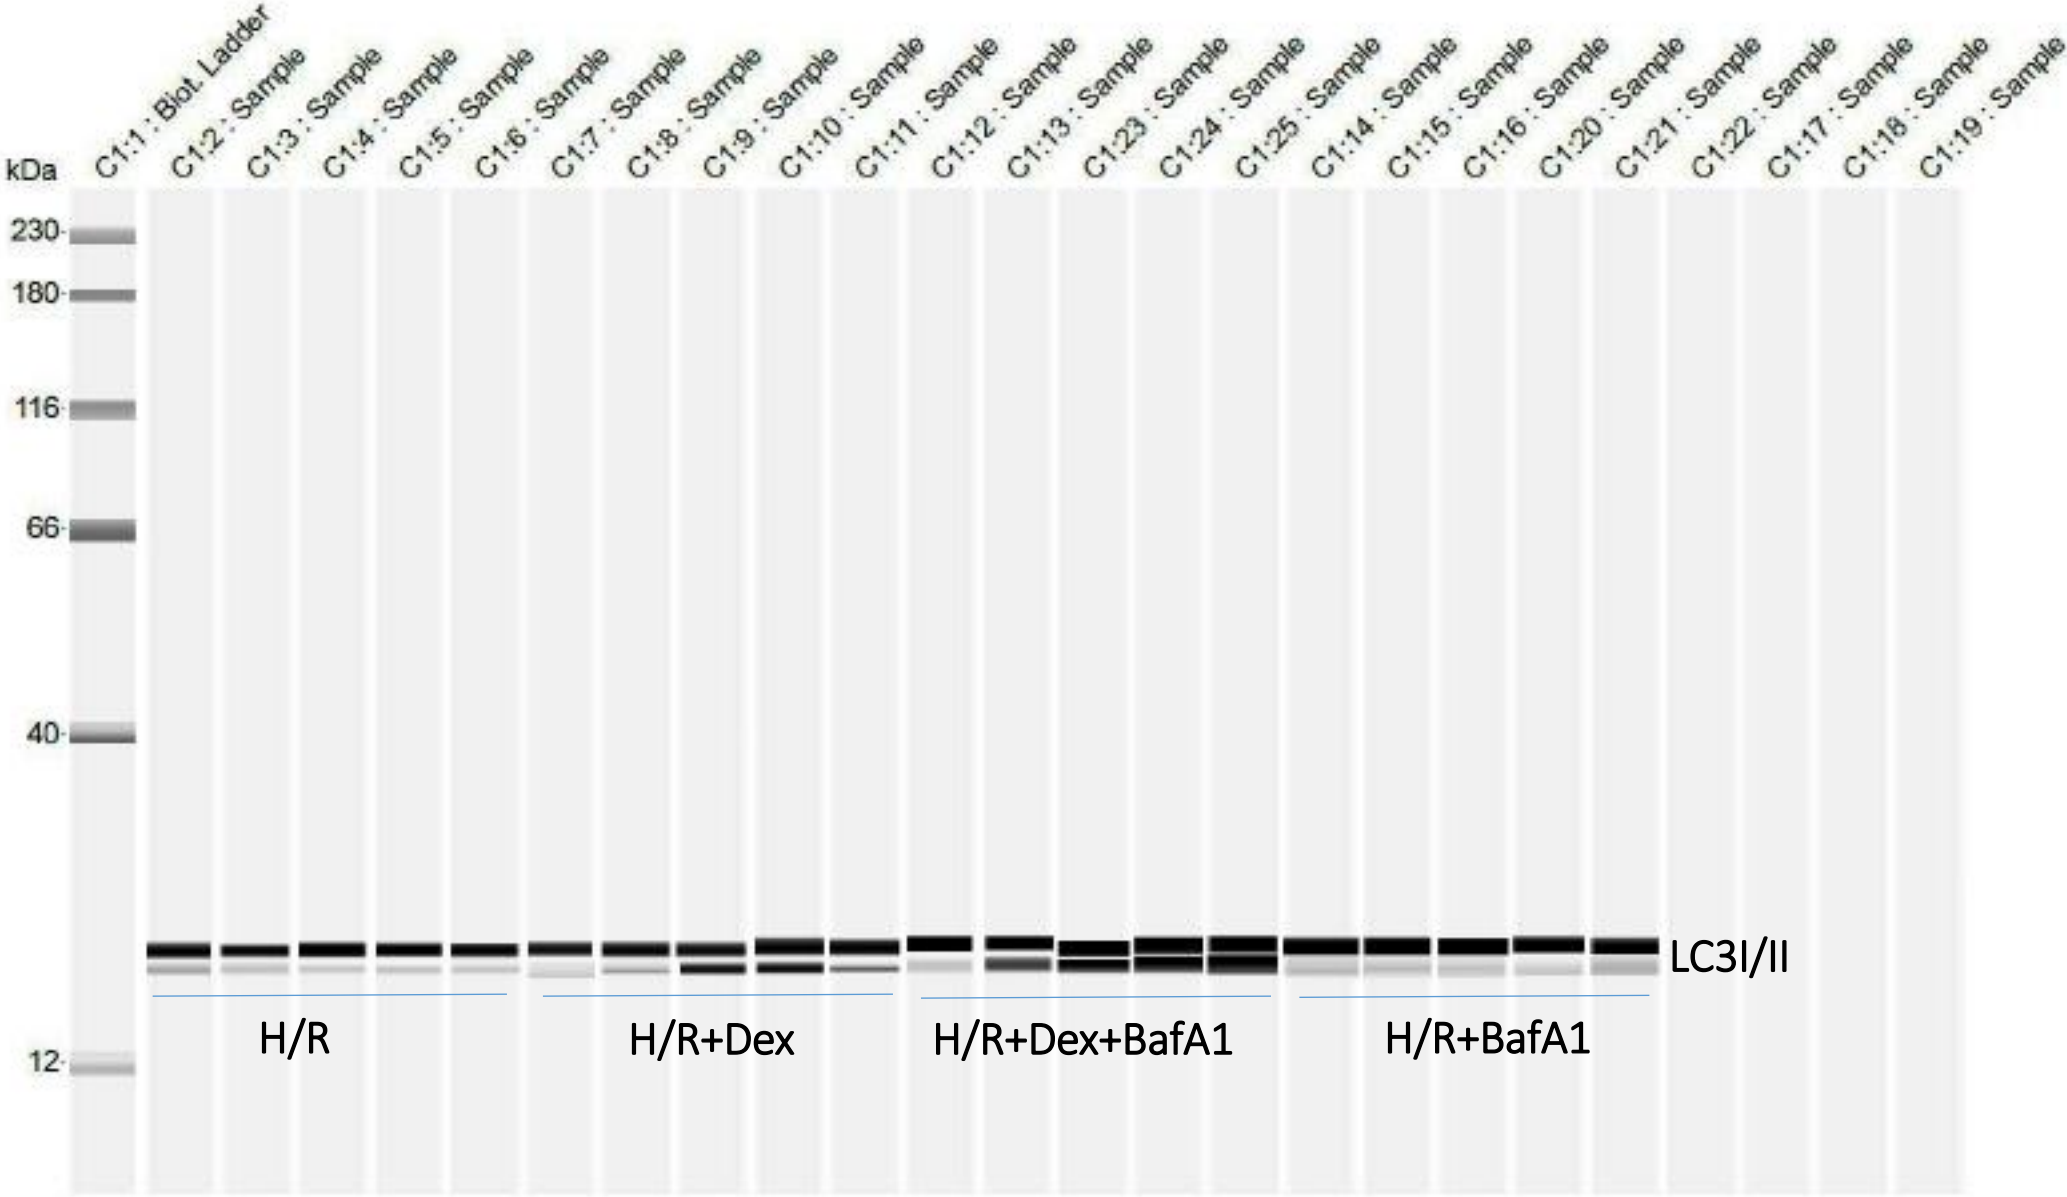

Fig.5C

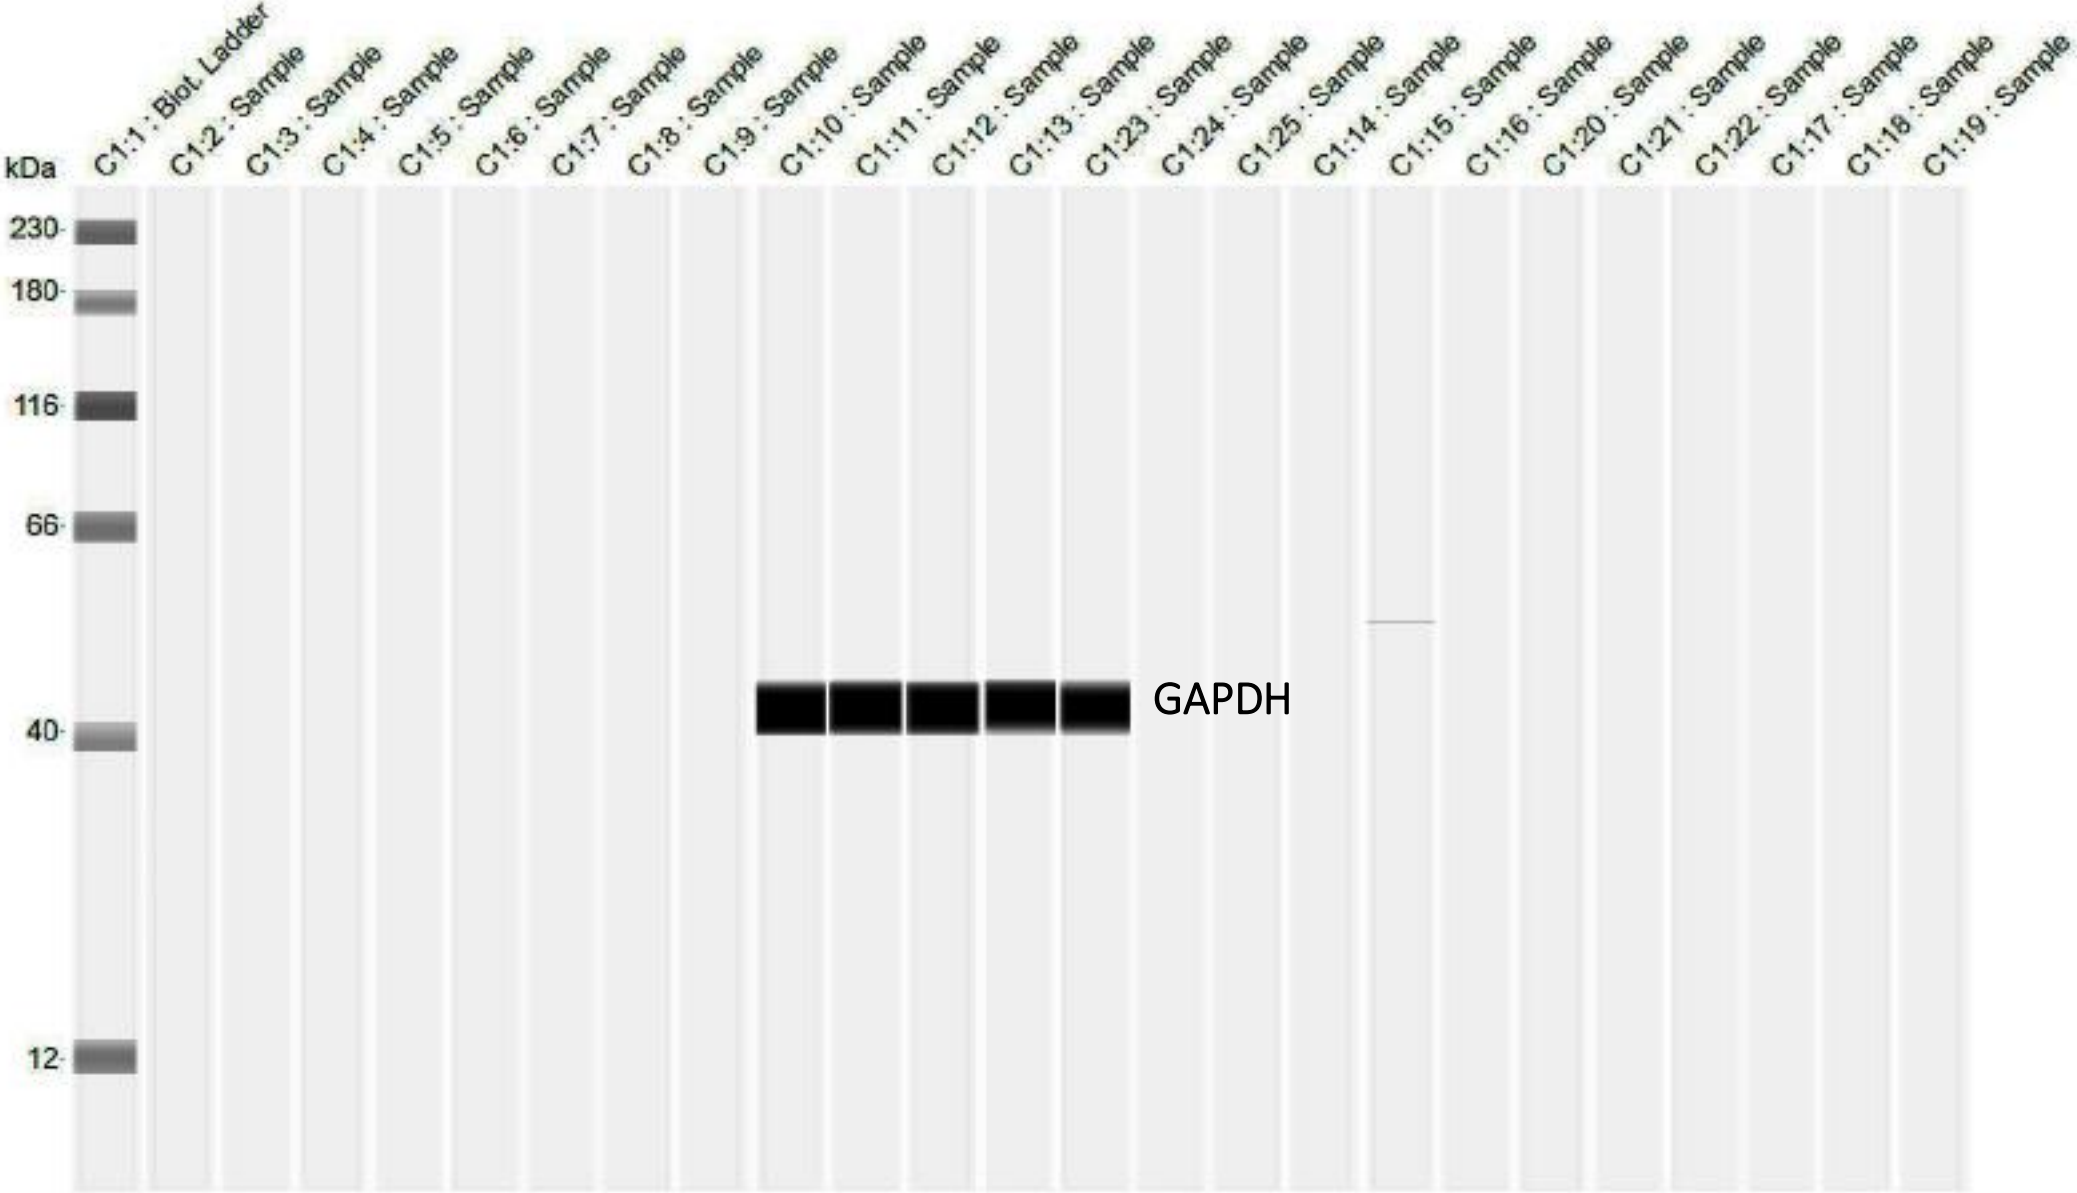

Fig.5C

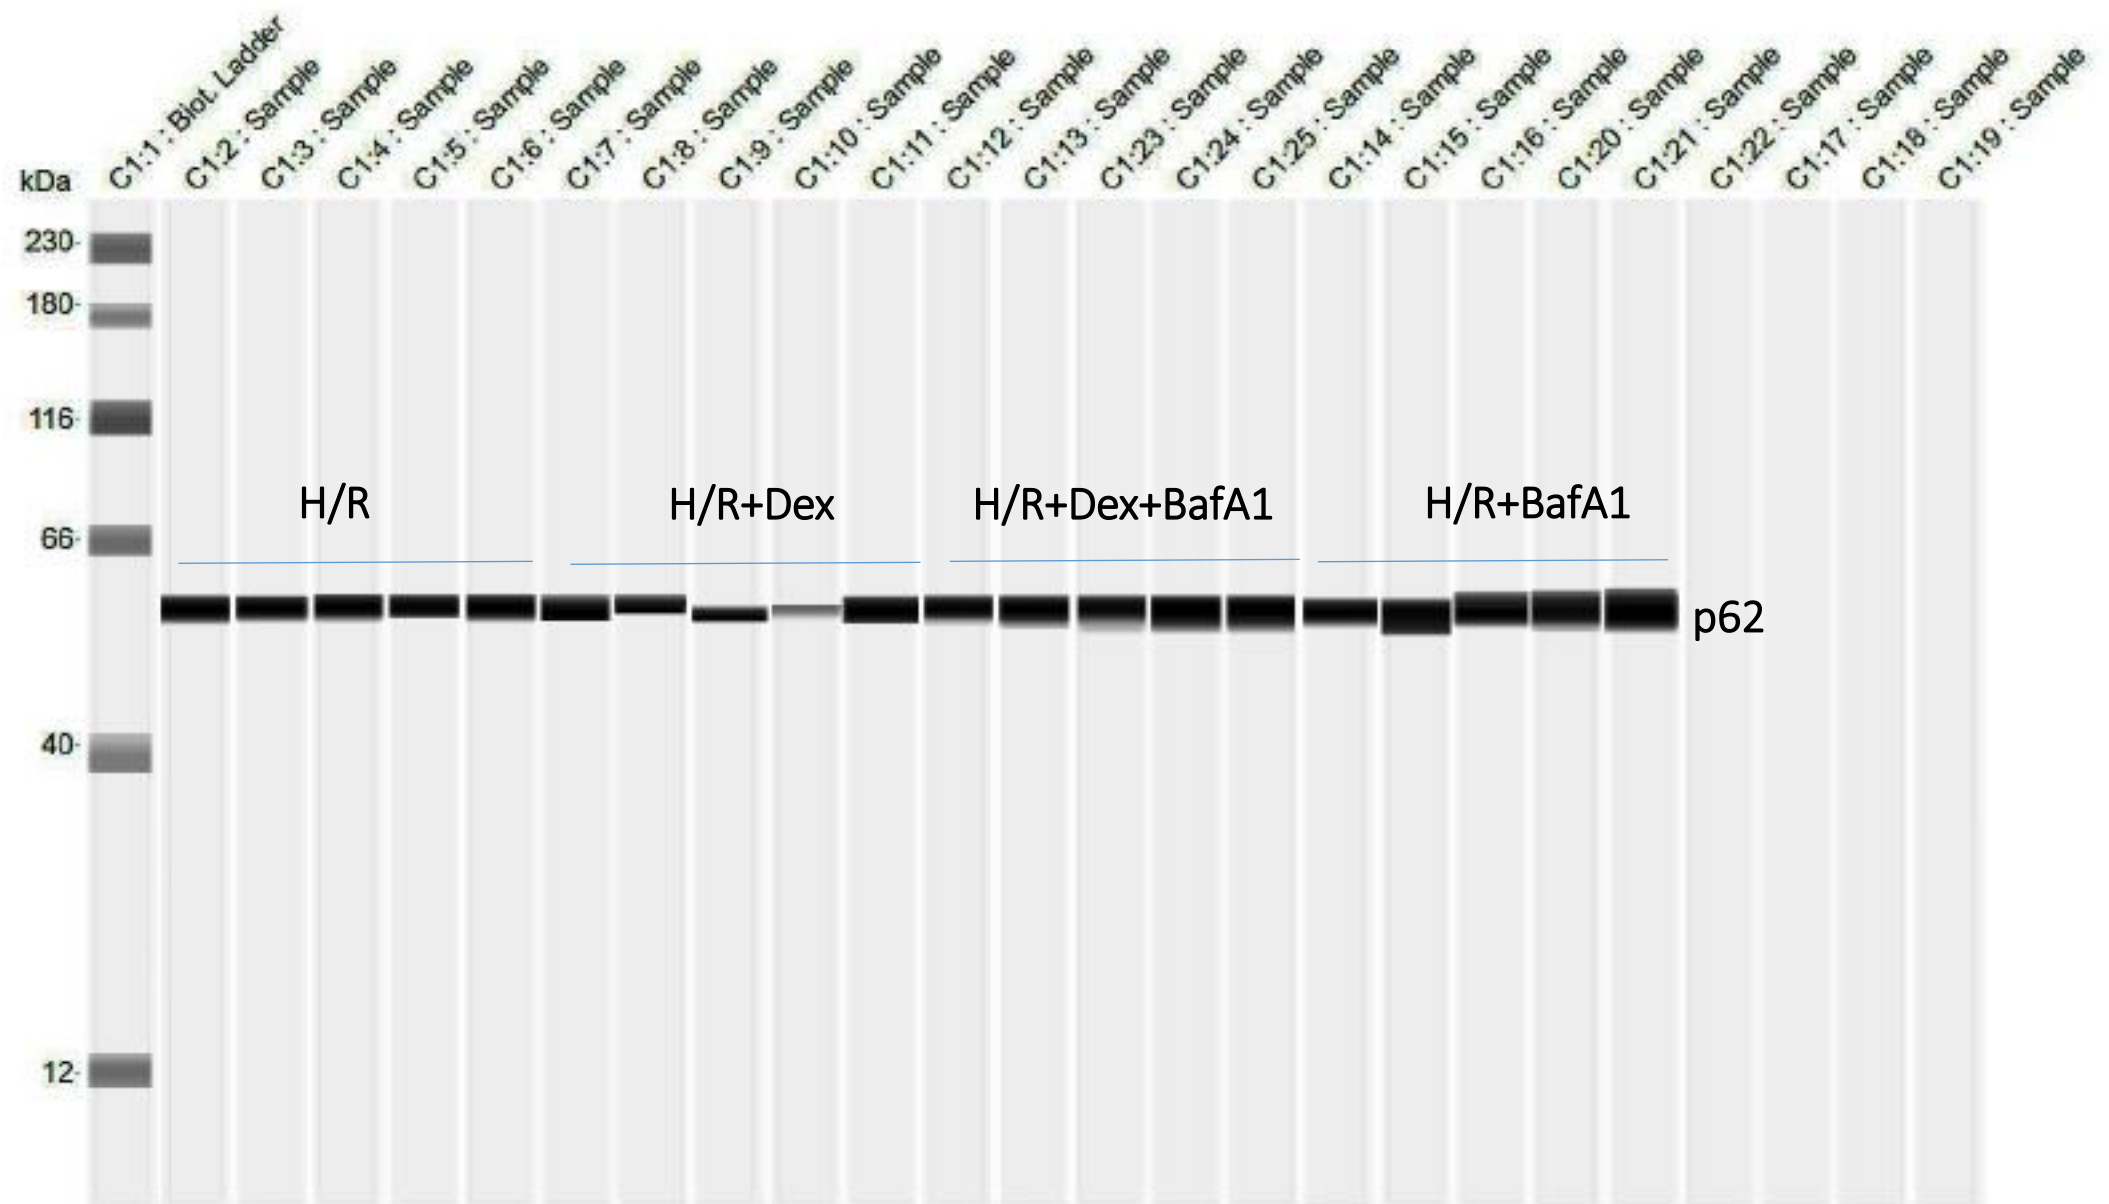

Fig.6A

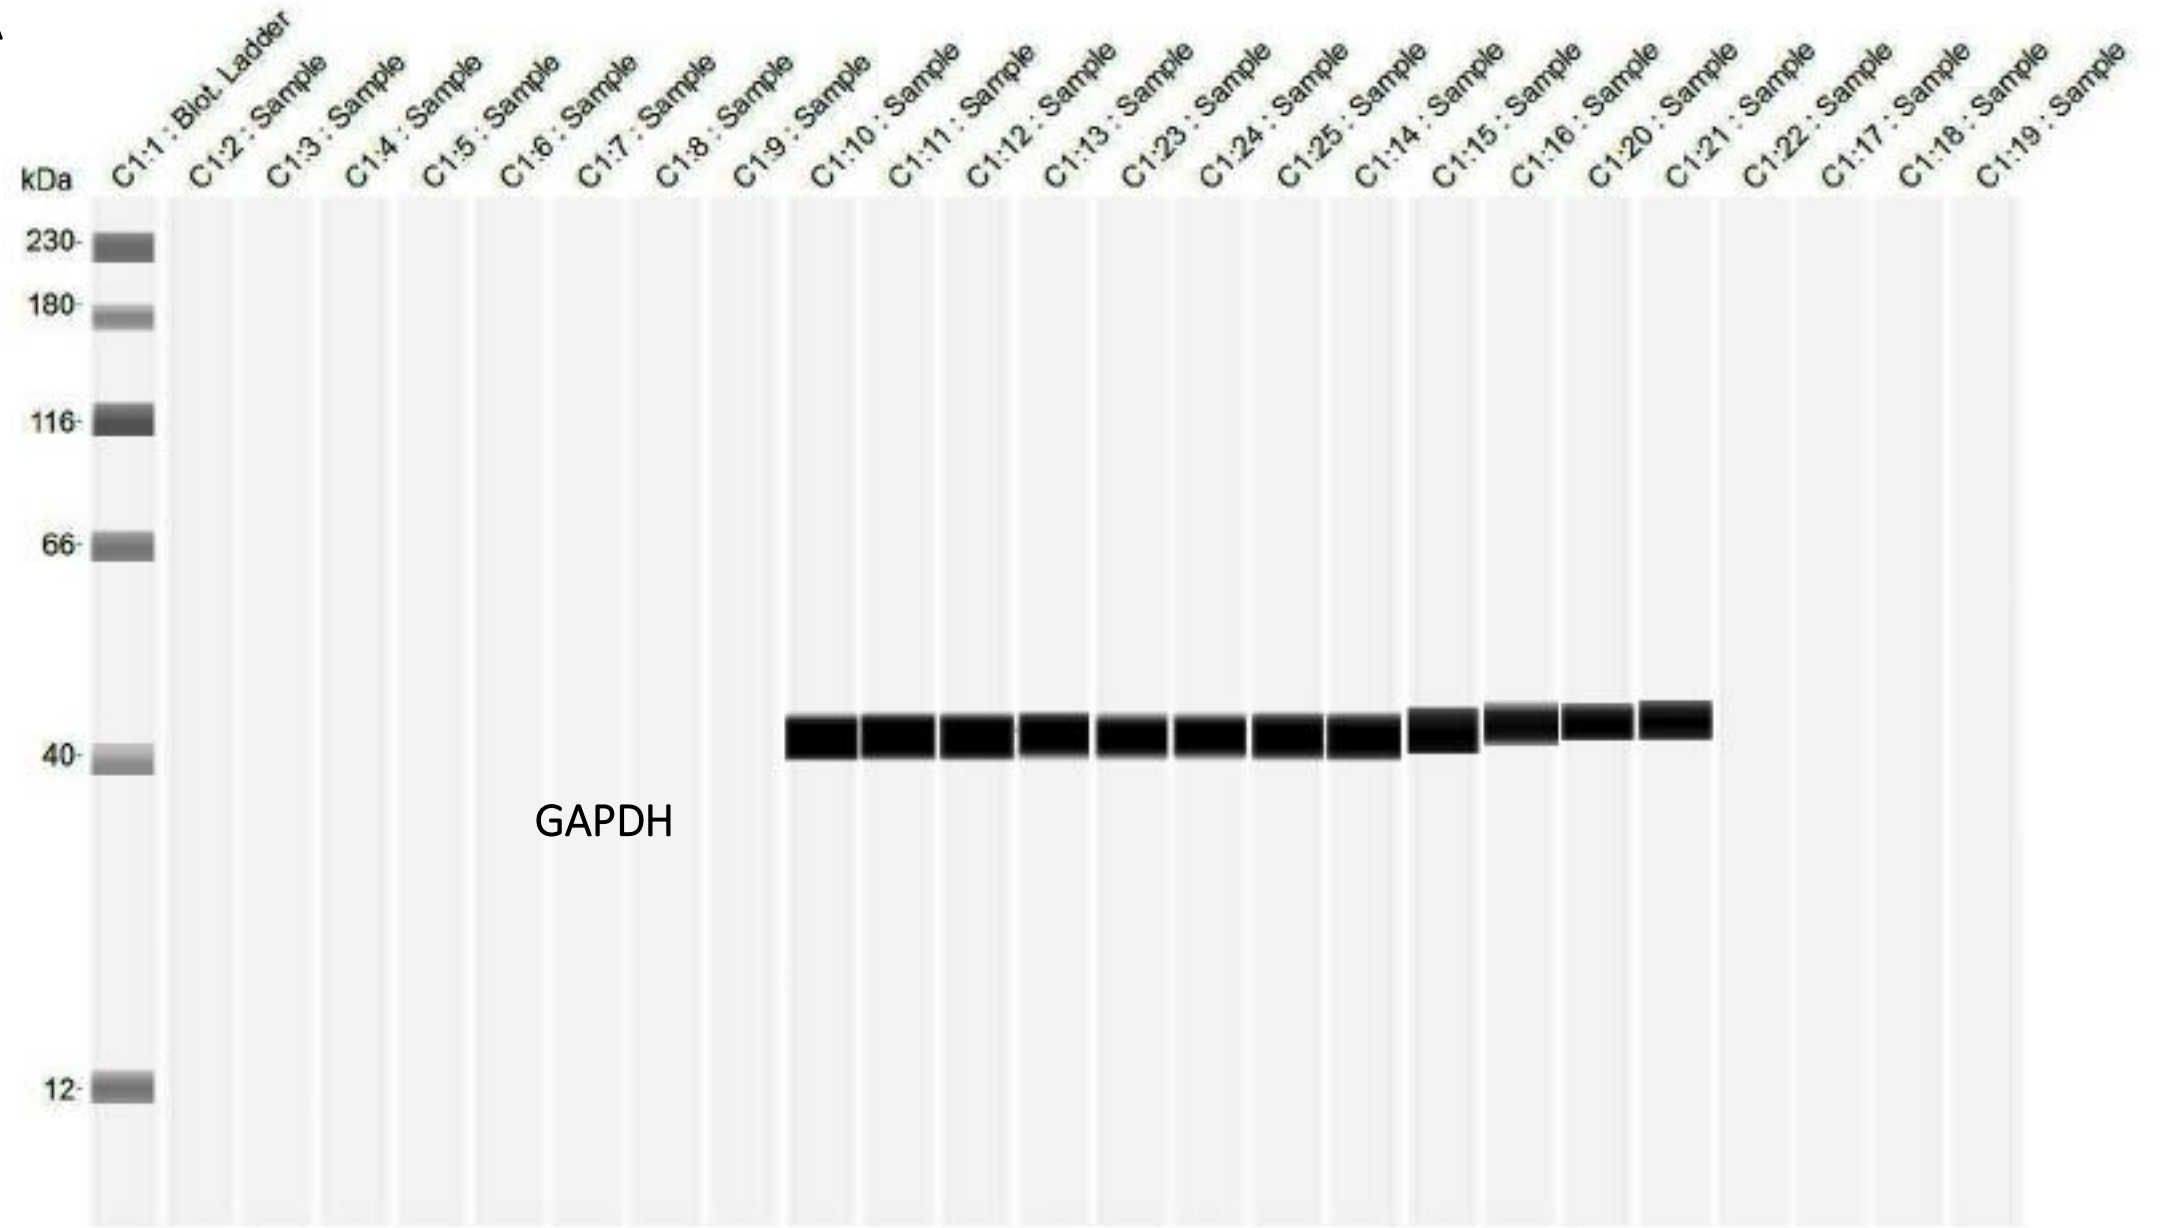



Fig.6A

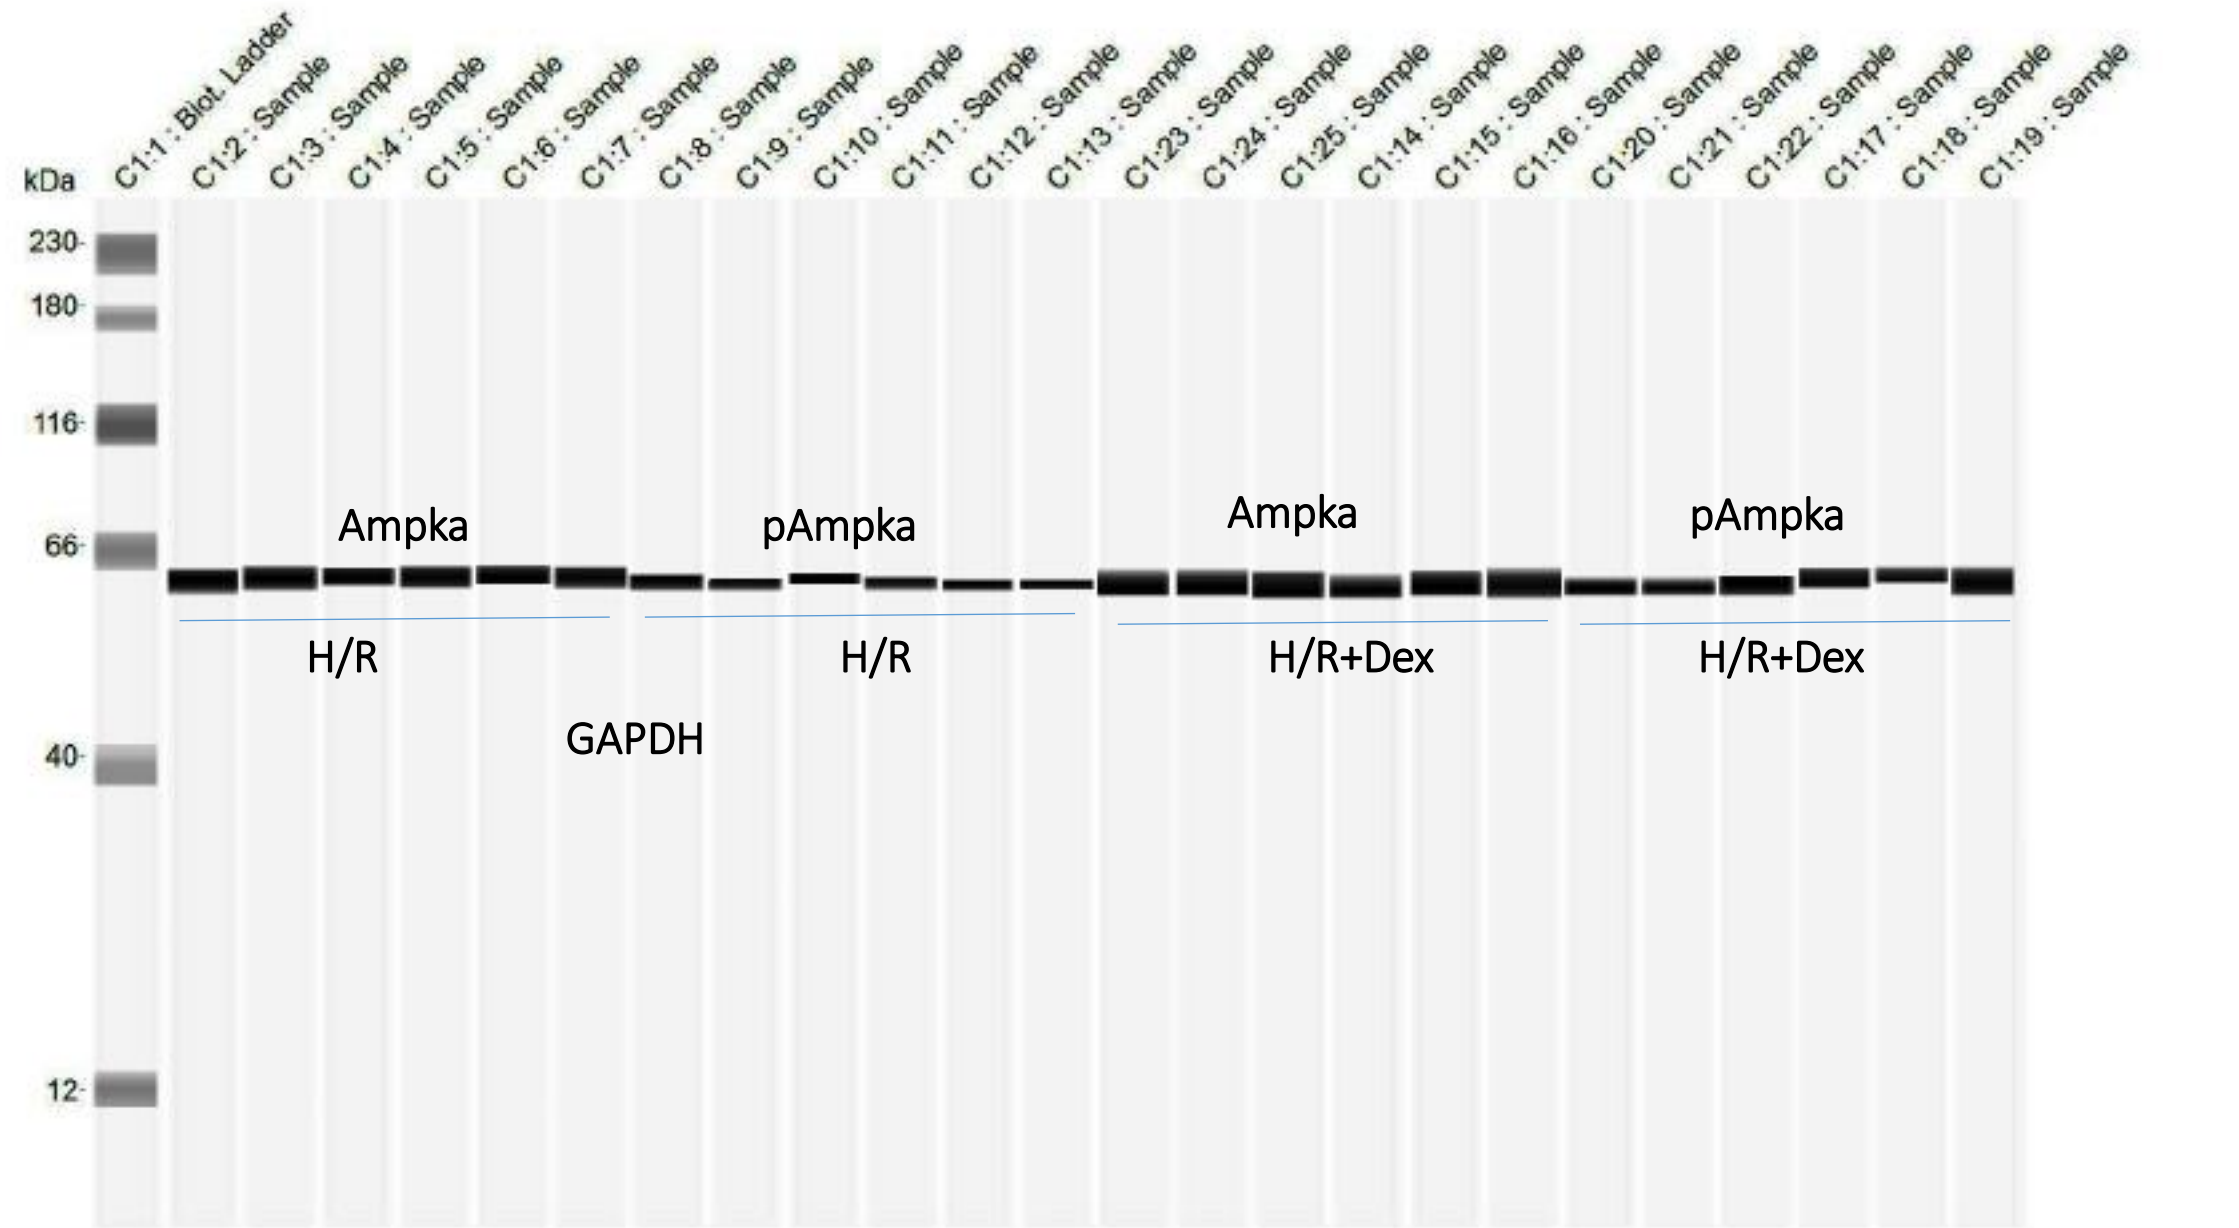

Fig.6D

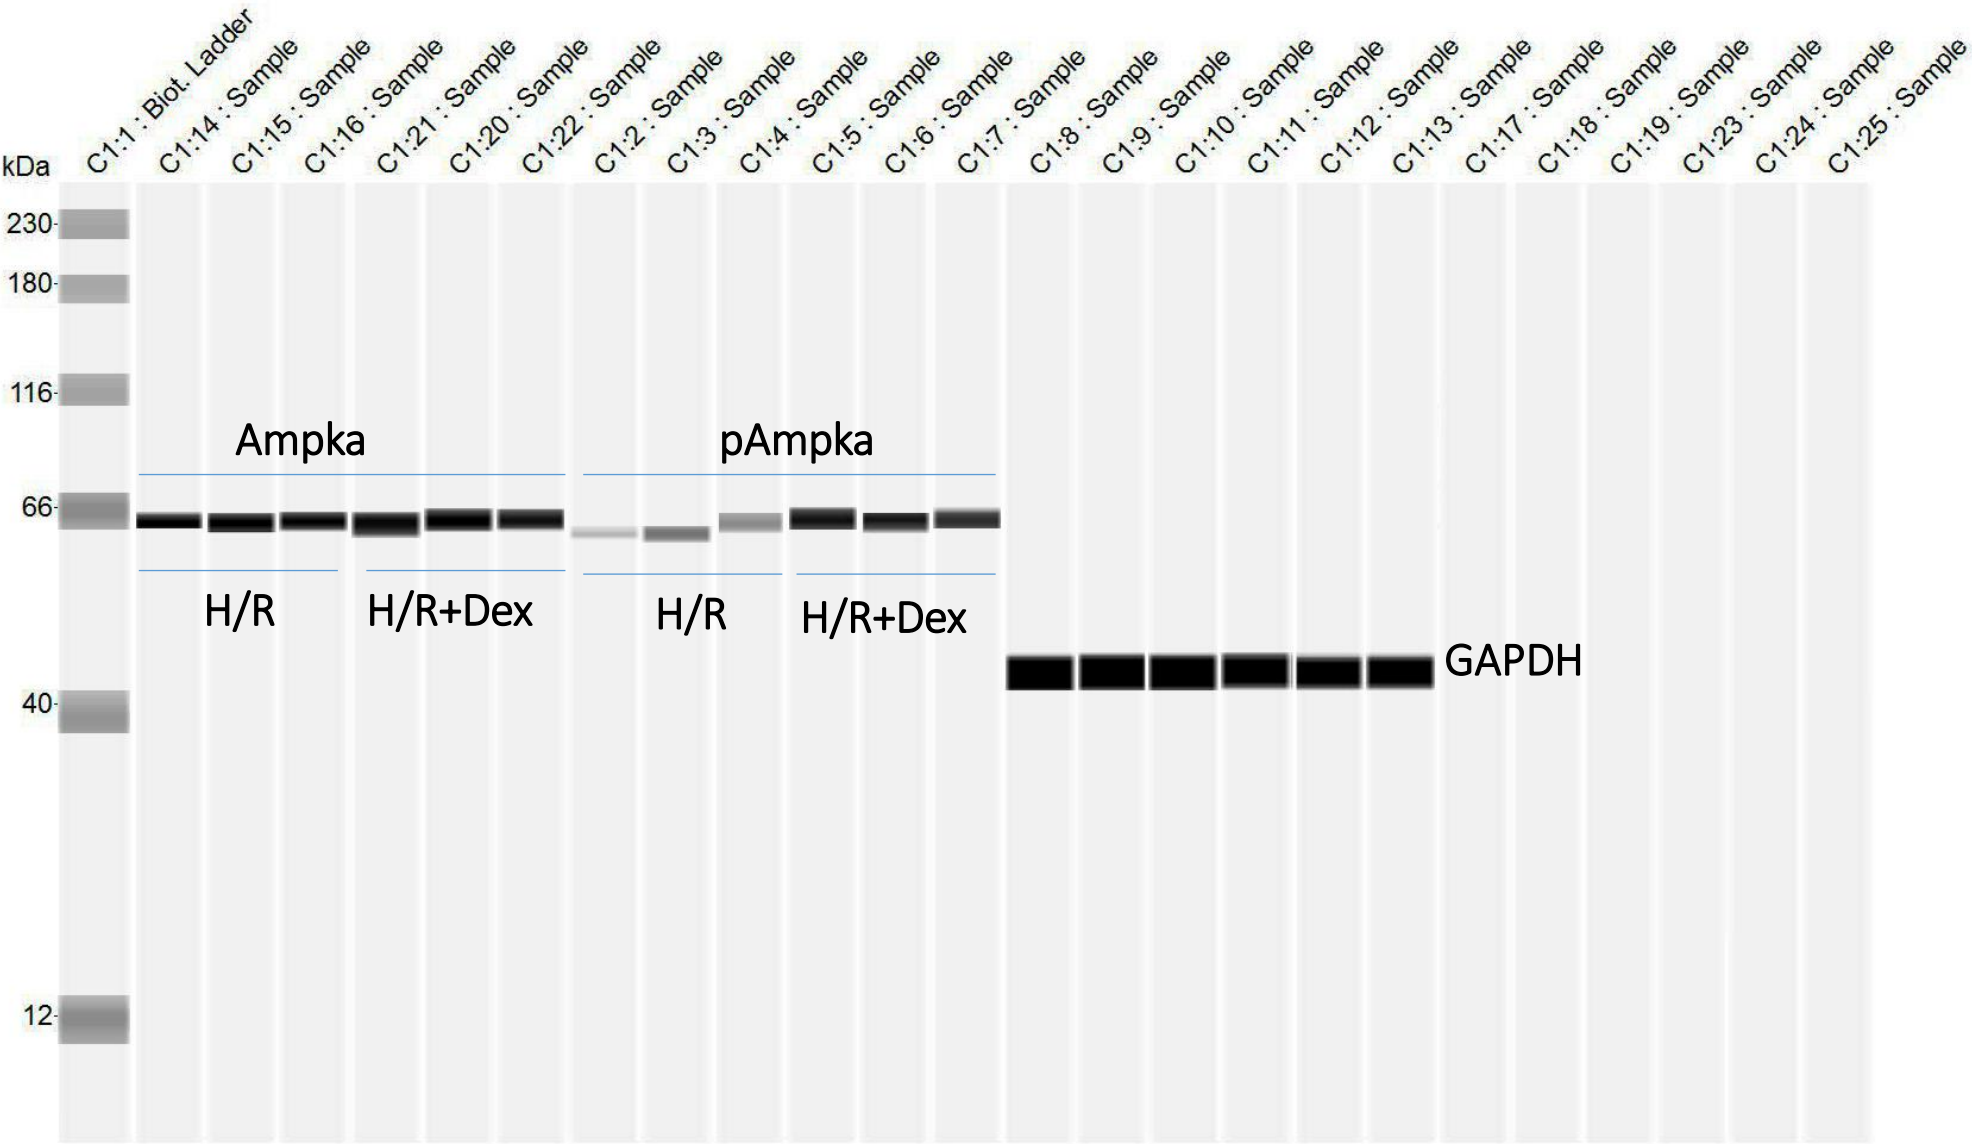

Fig.6G

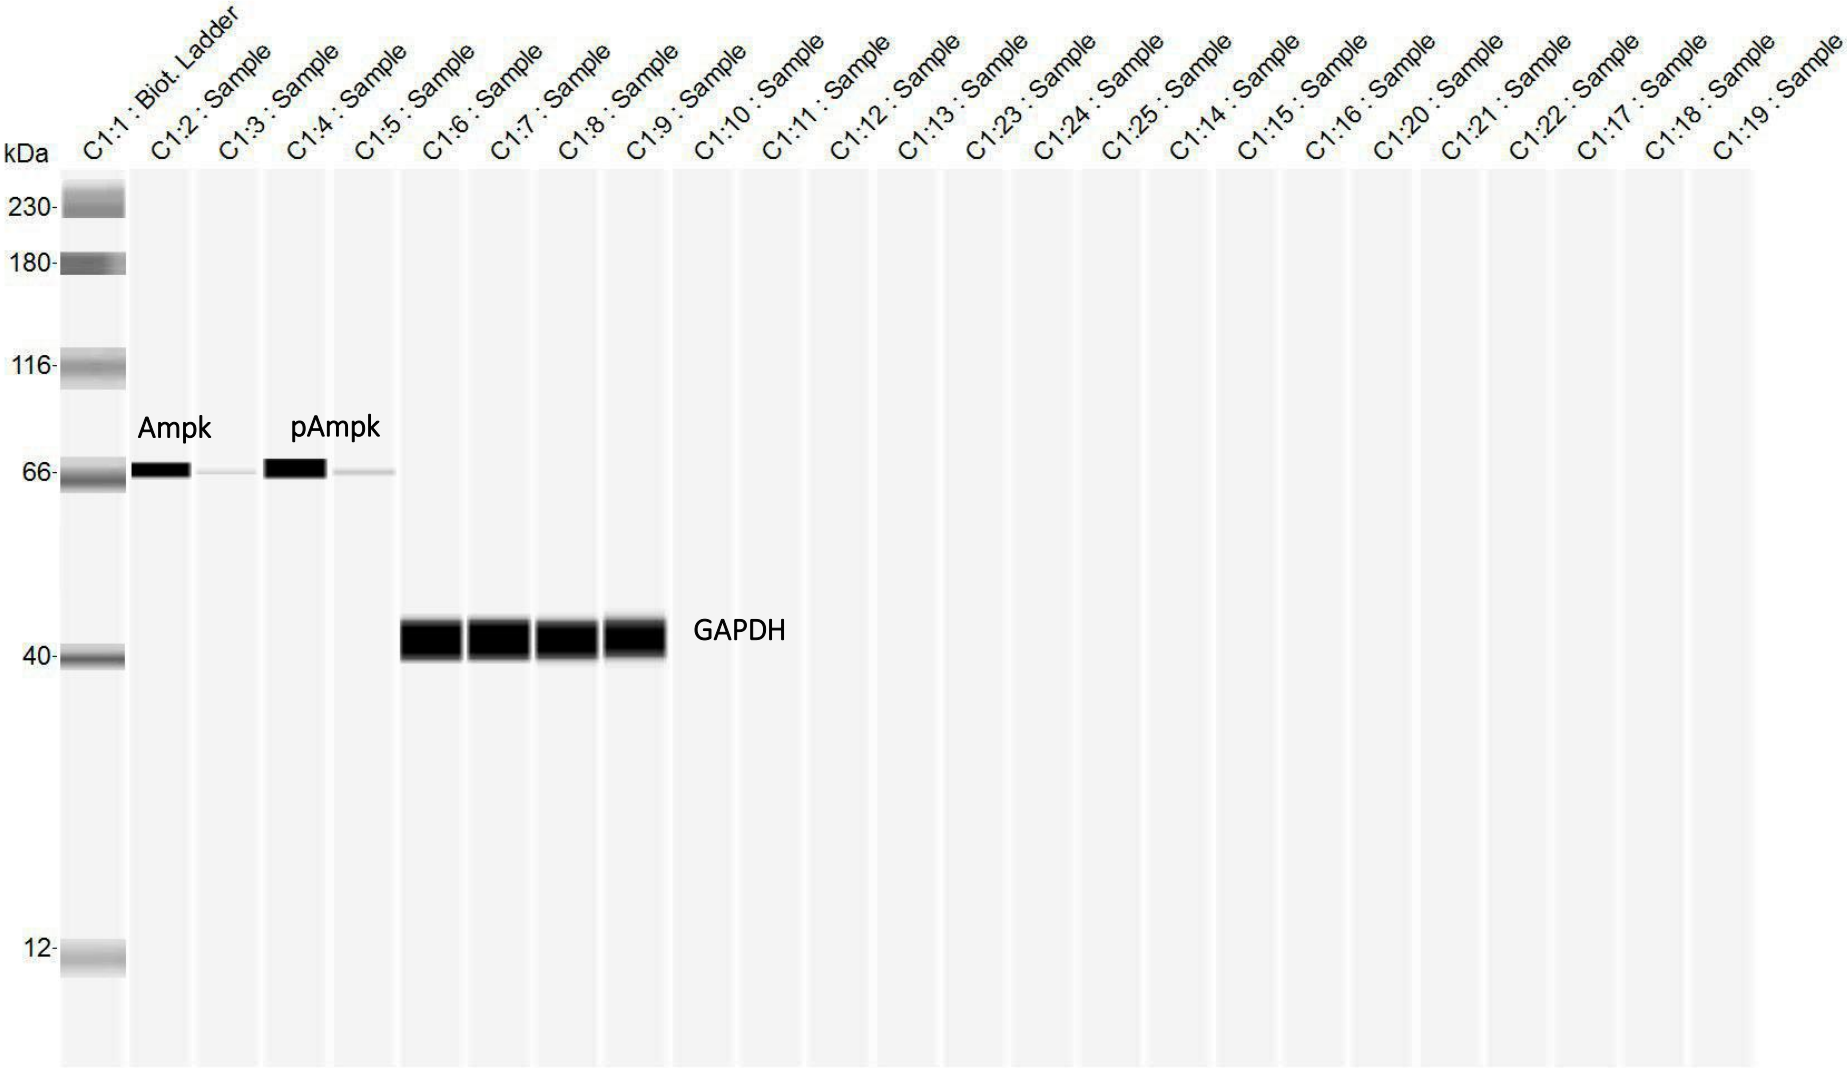

Fig.6I

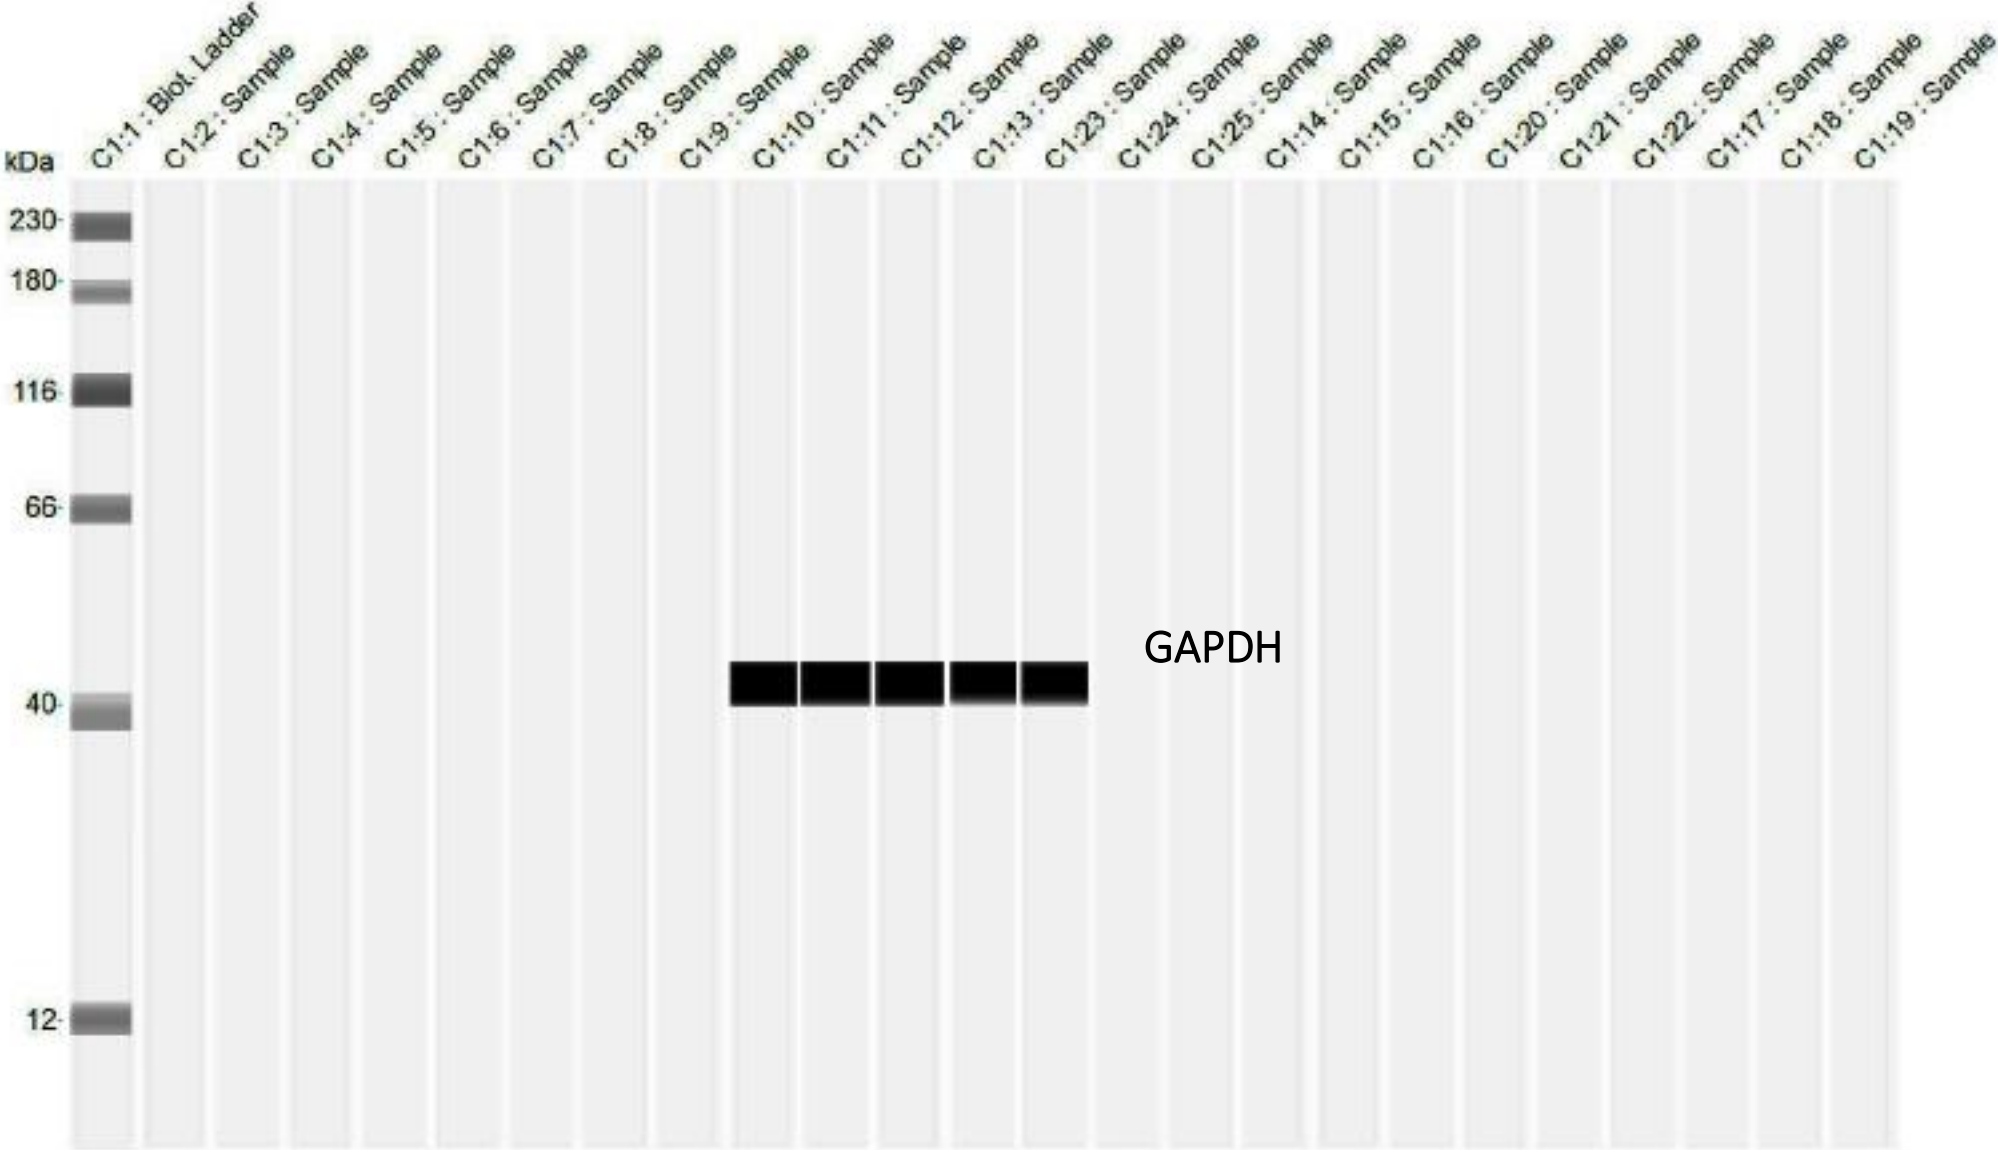

Fig.6I

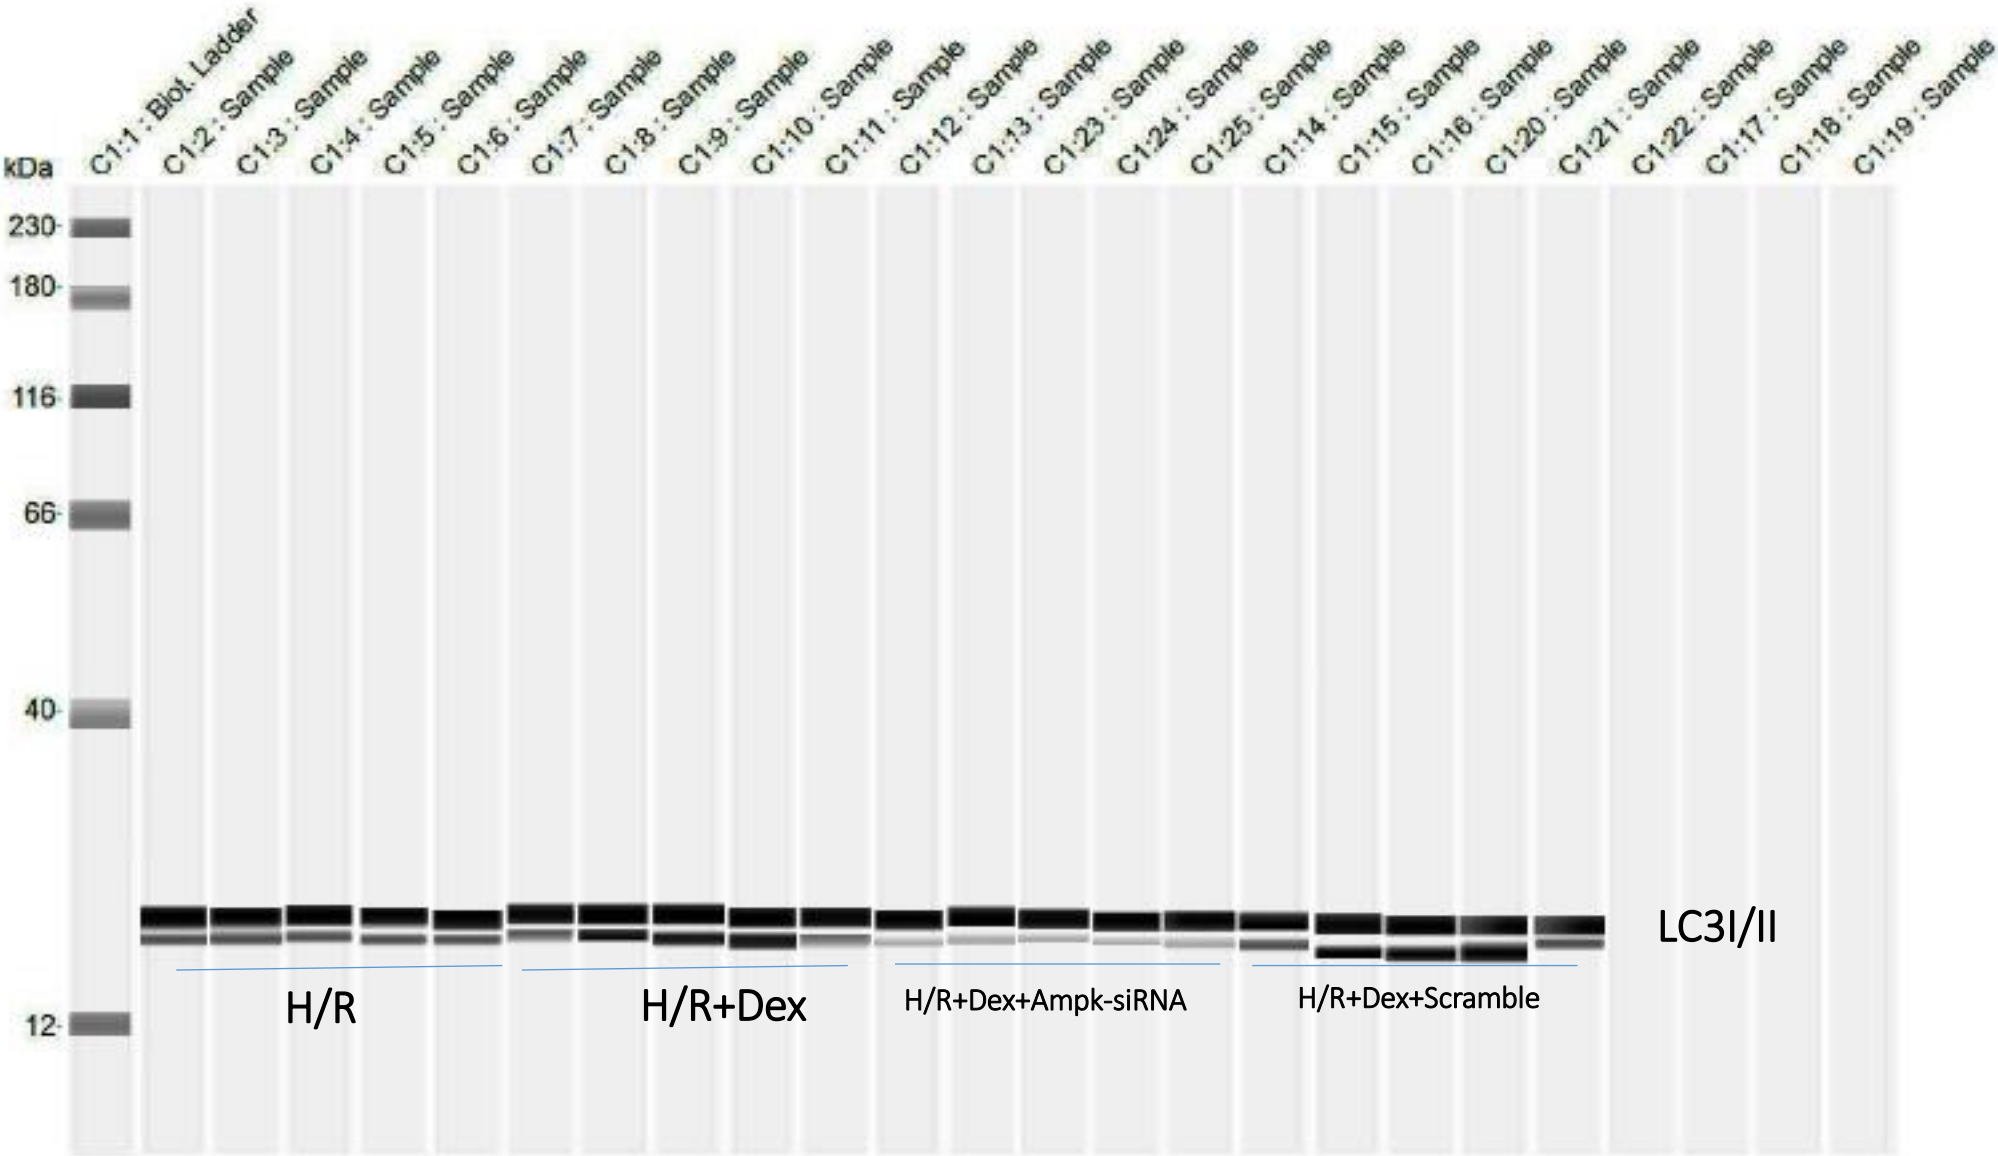

Fig.6K

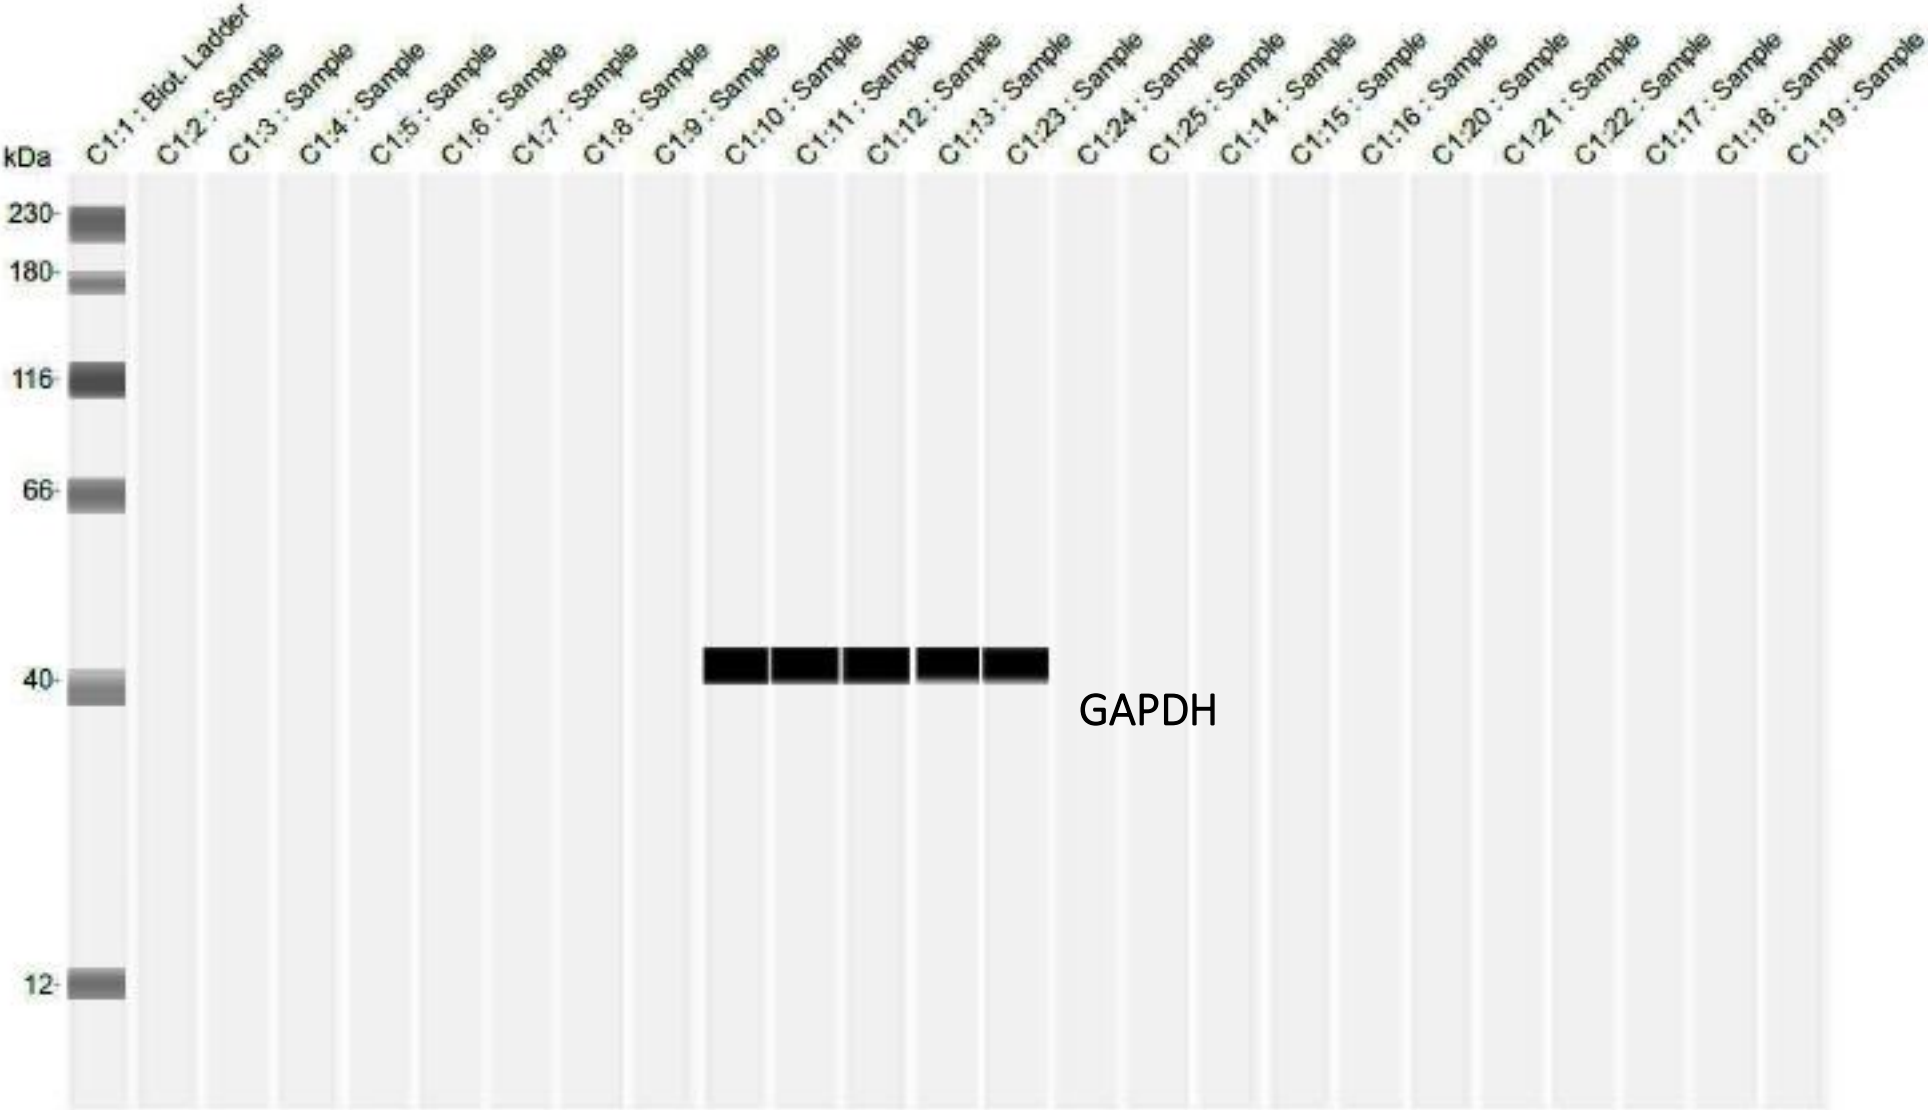

Fig.6K

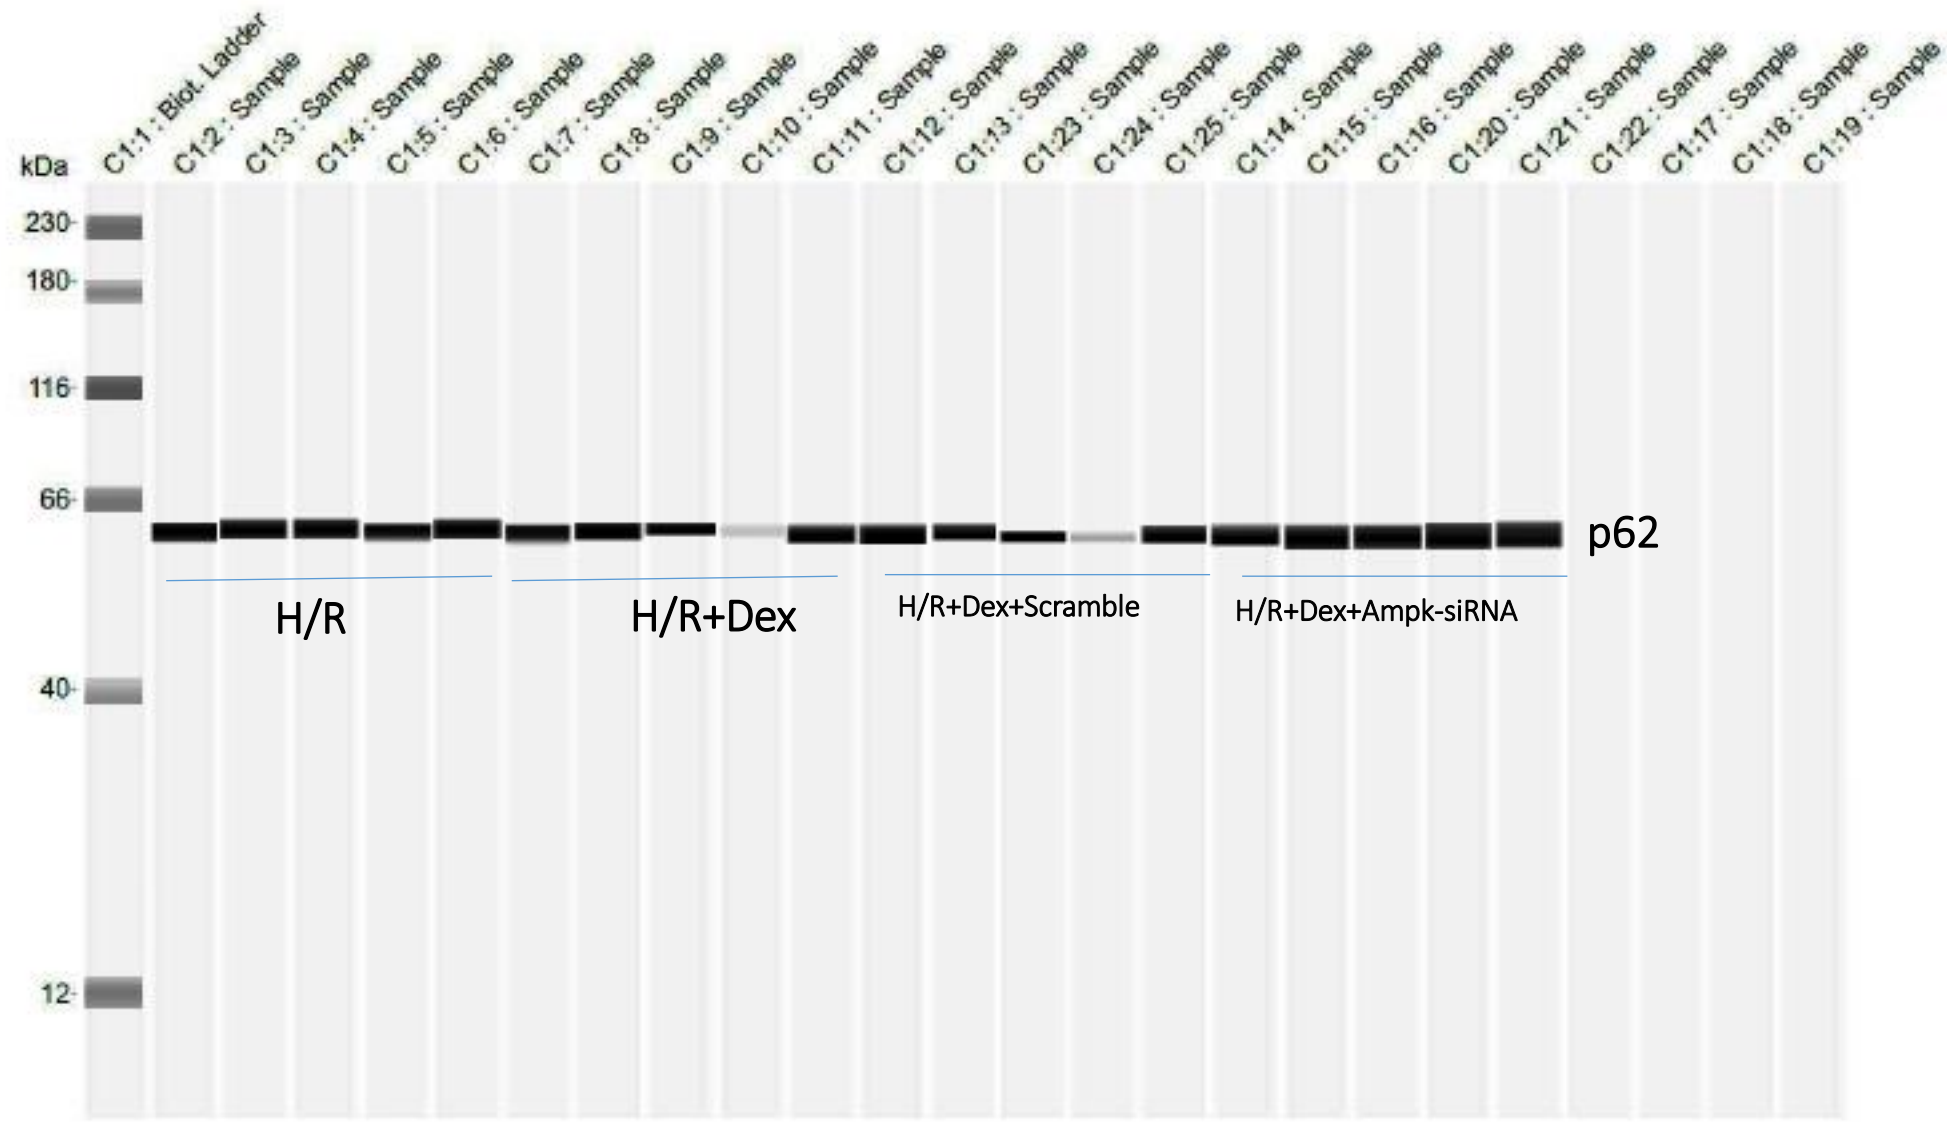



Fig.7A

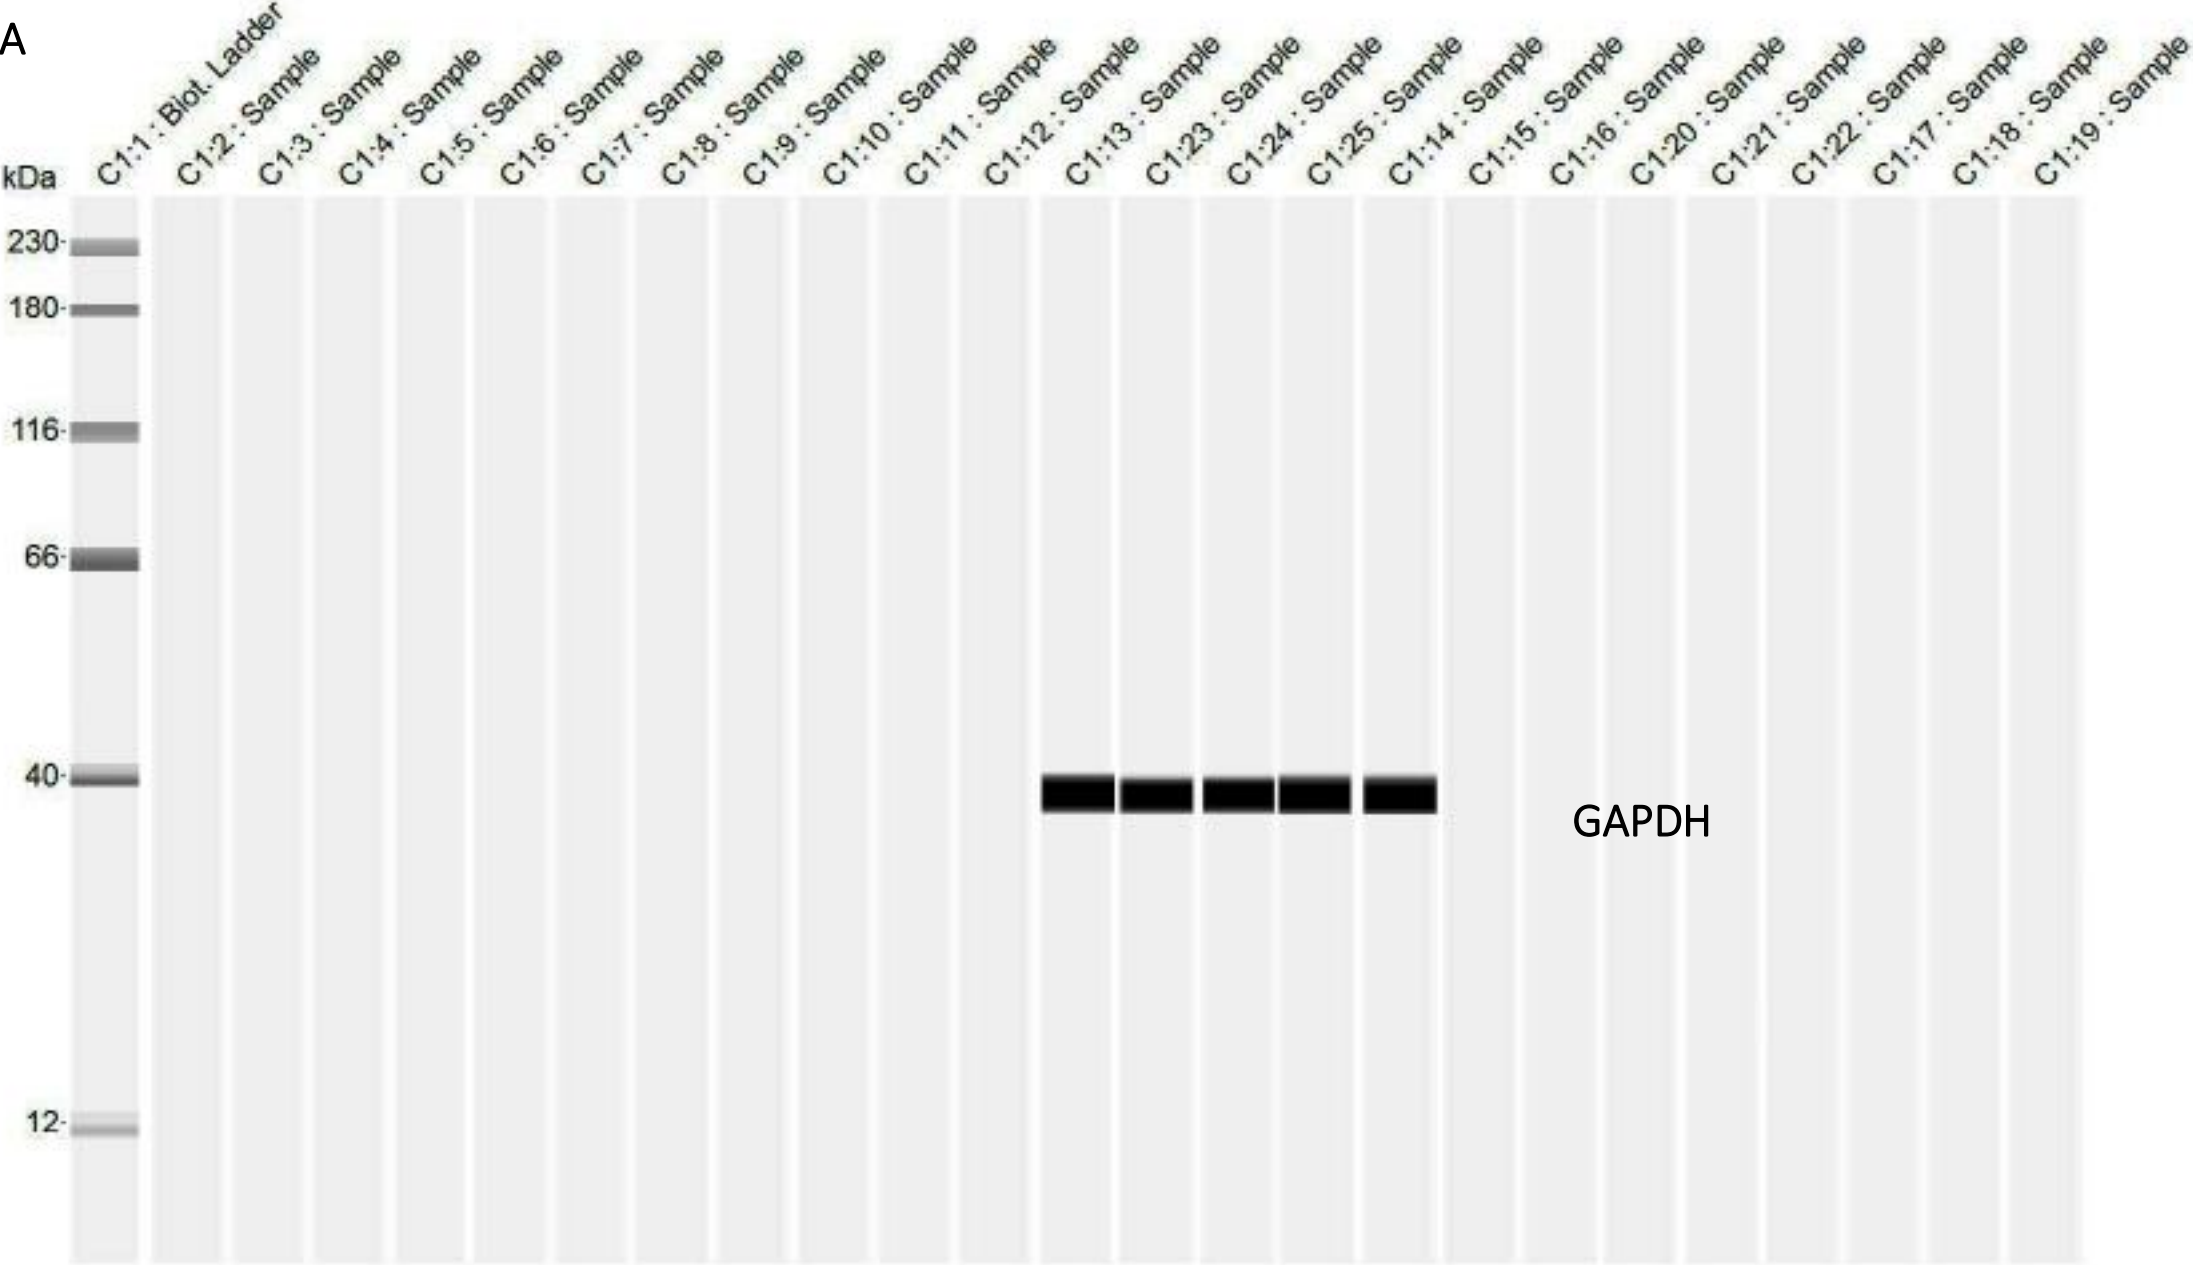

Fig.7A

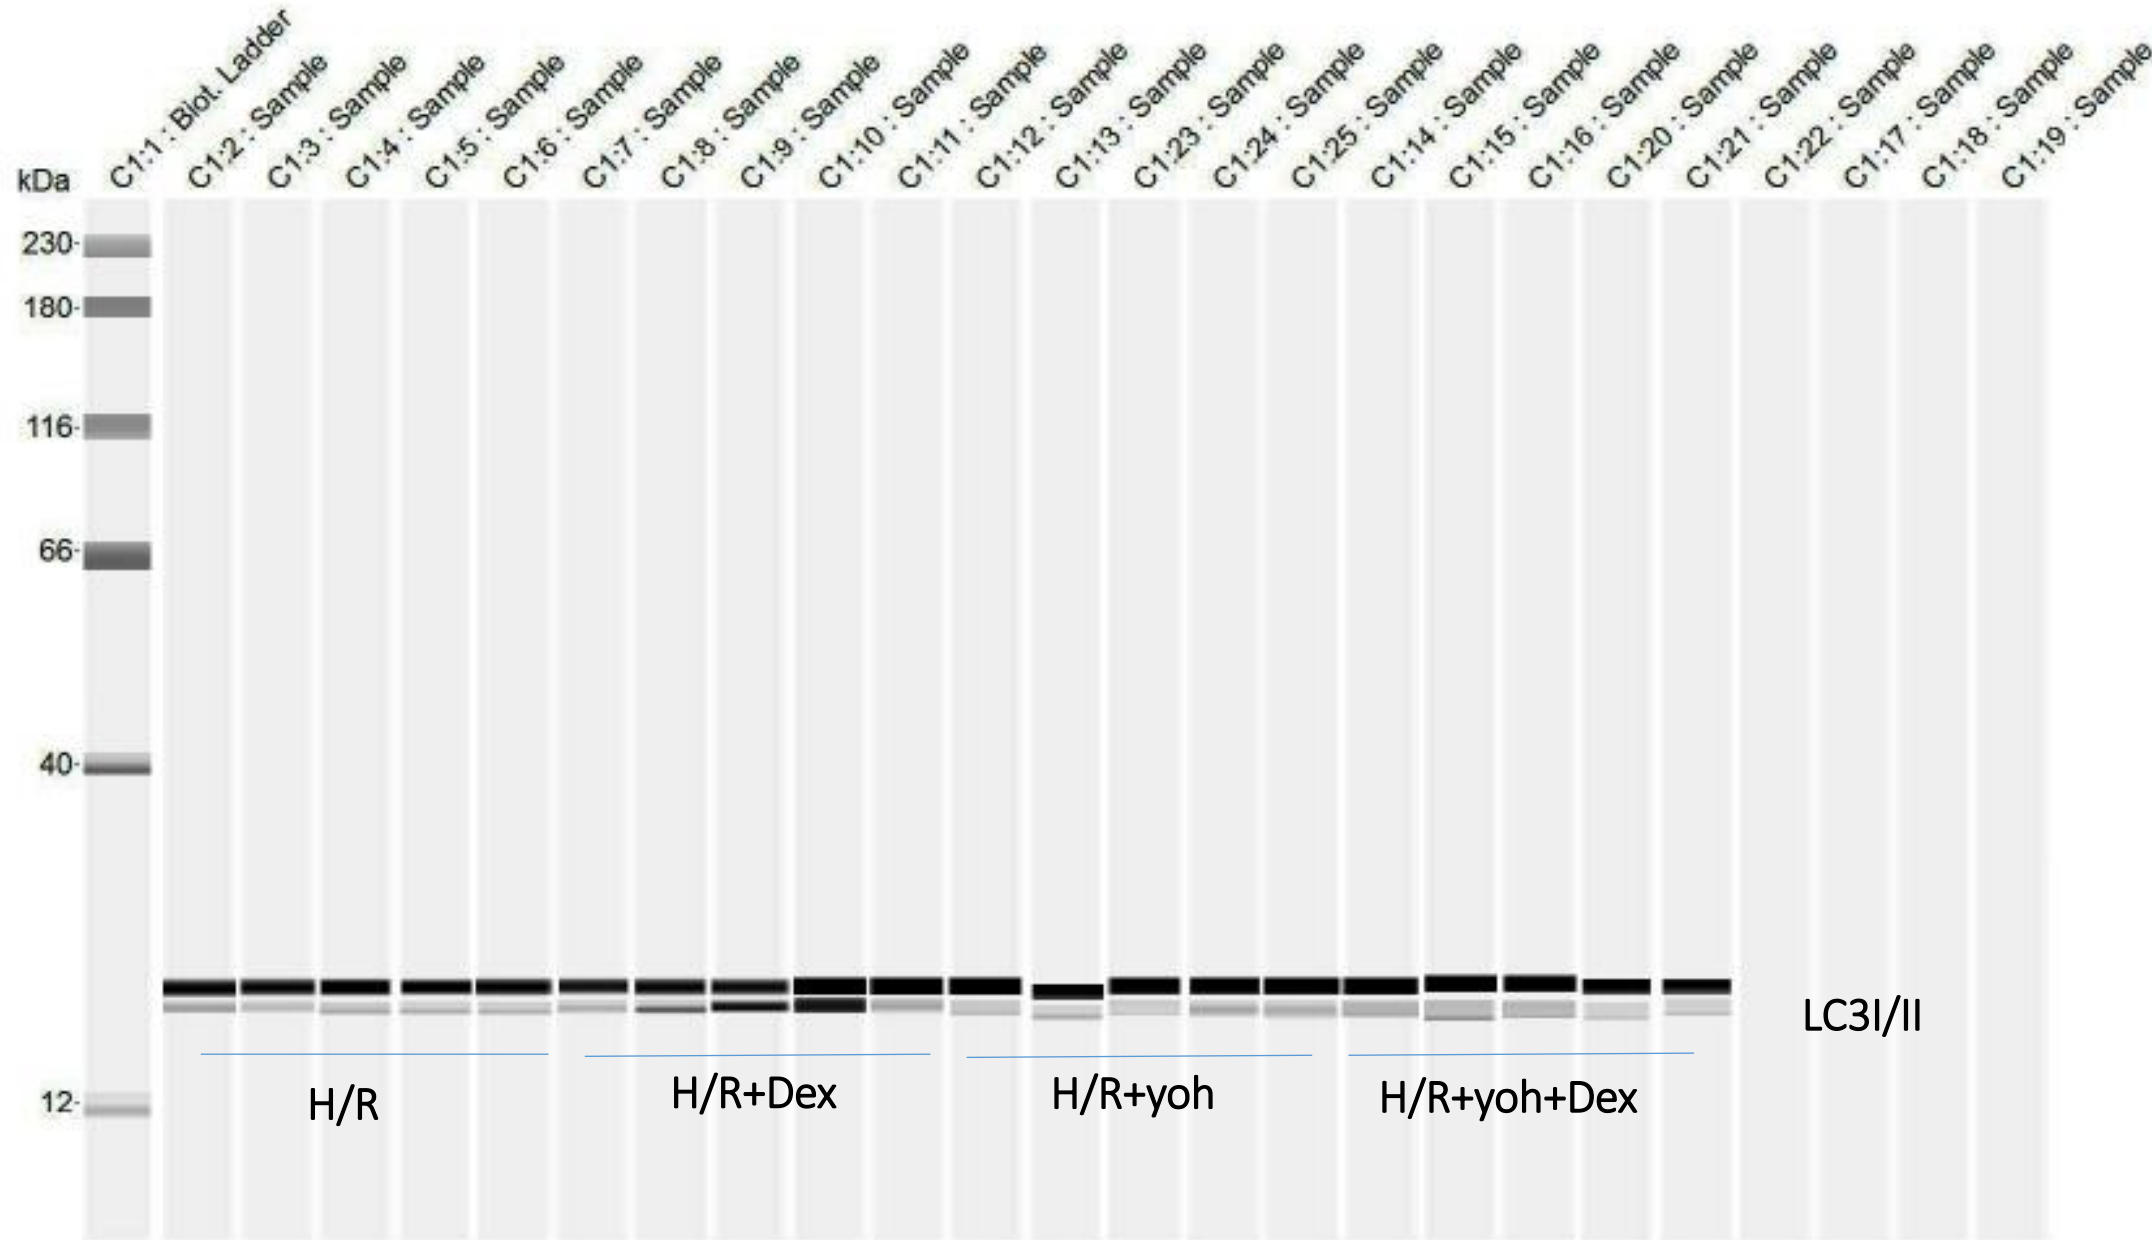

Fig.7C

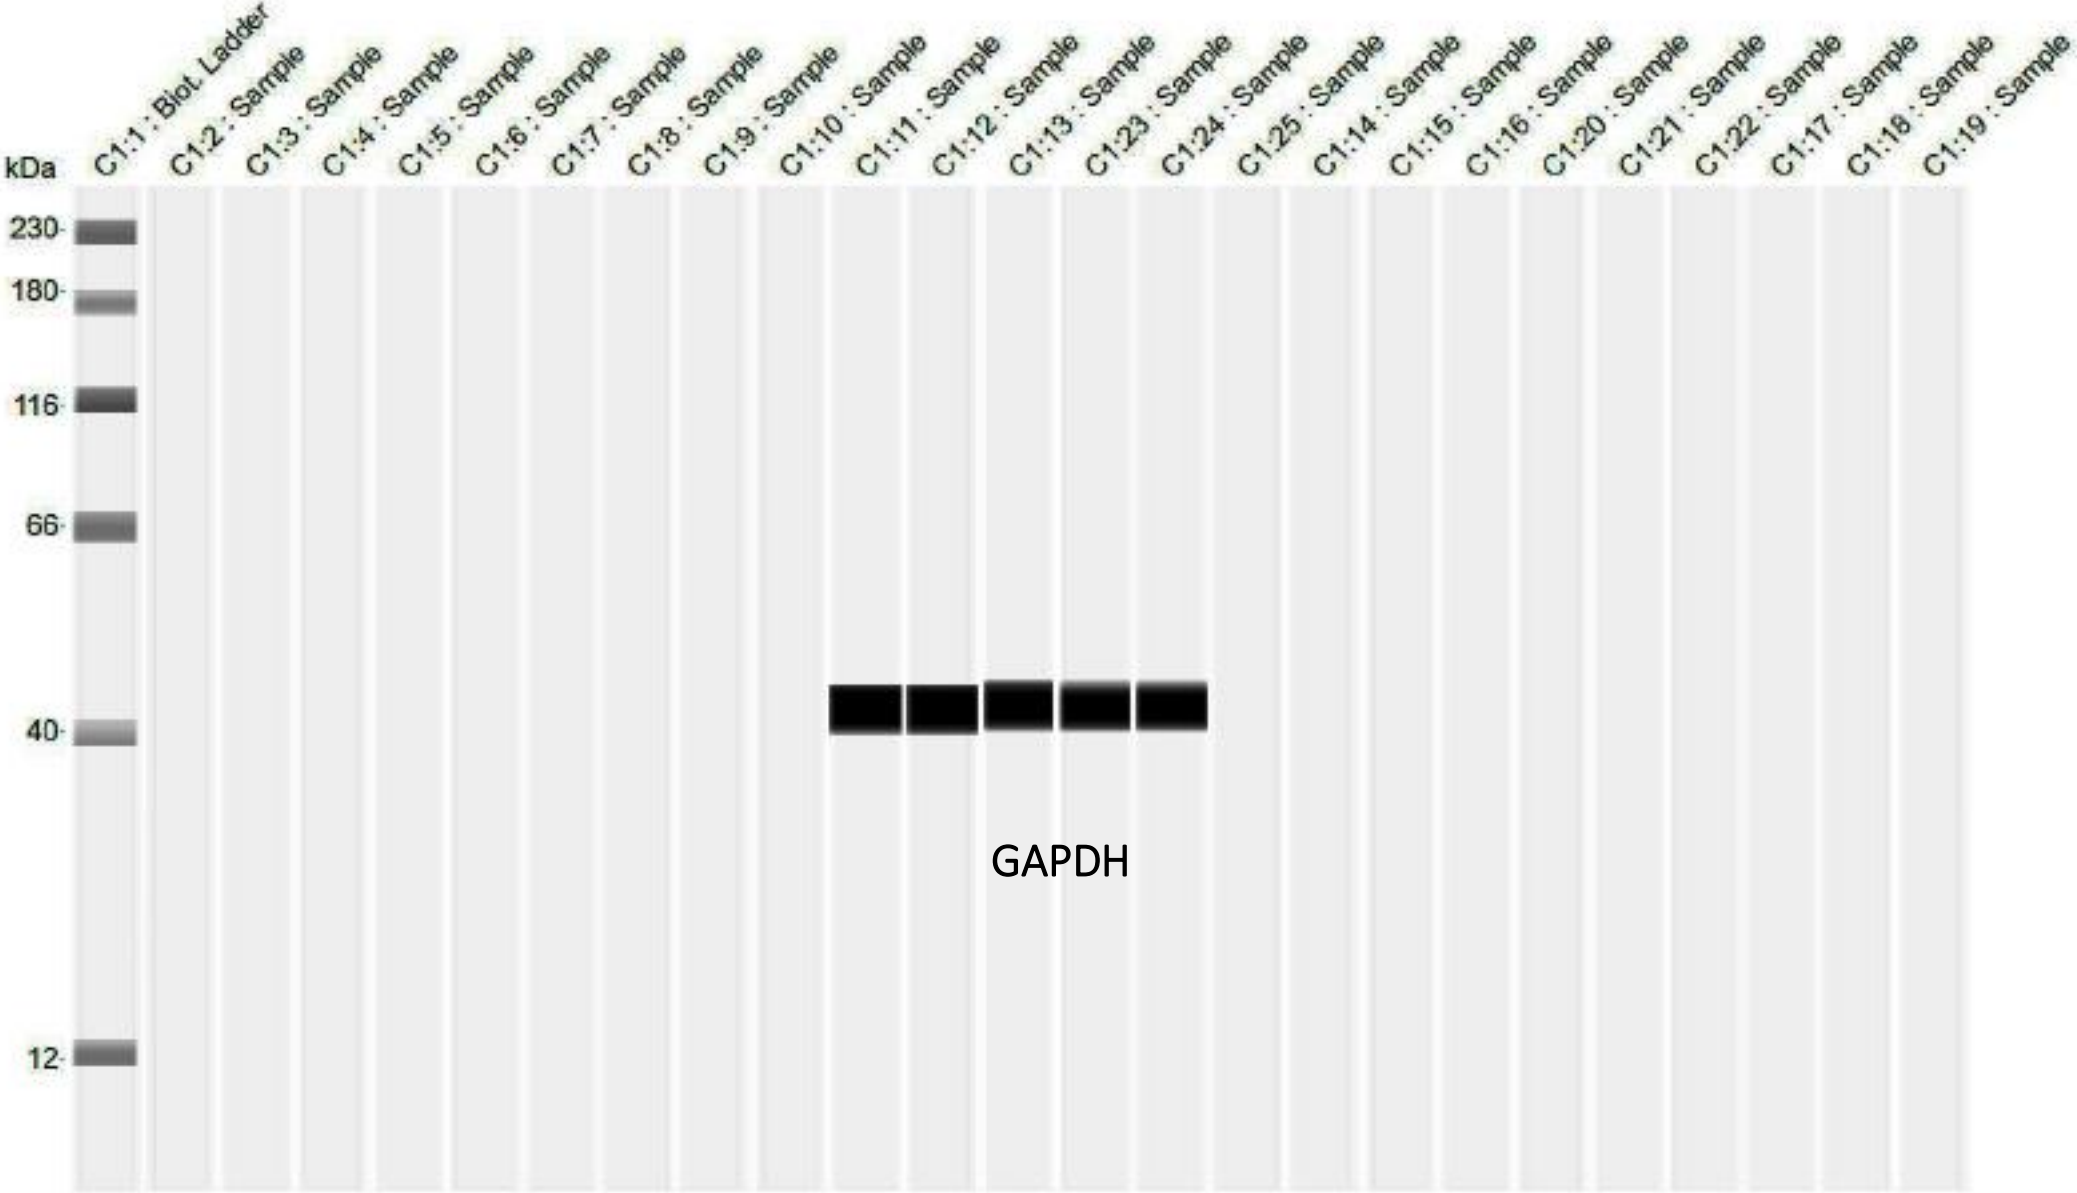

Fig.7C

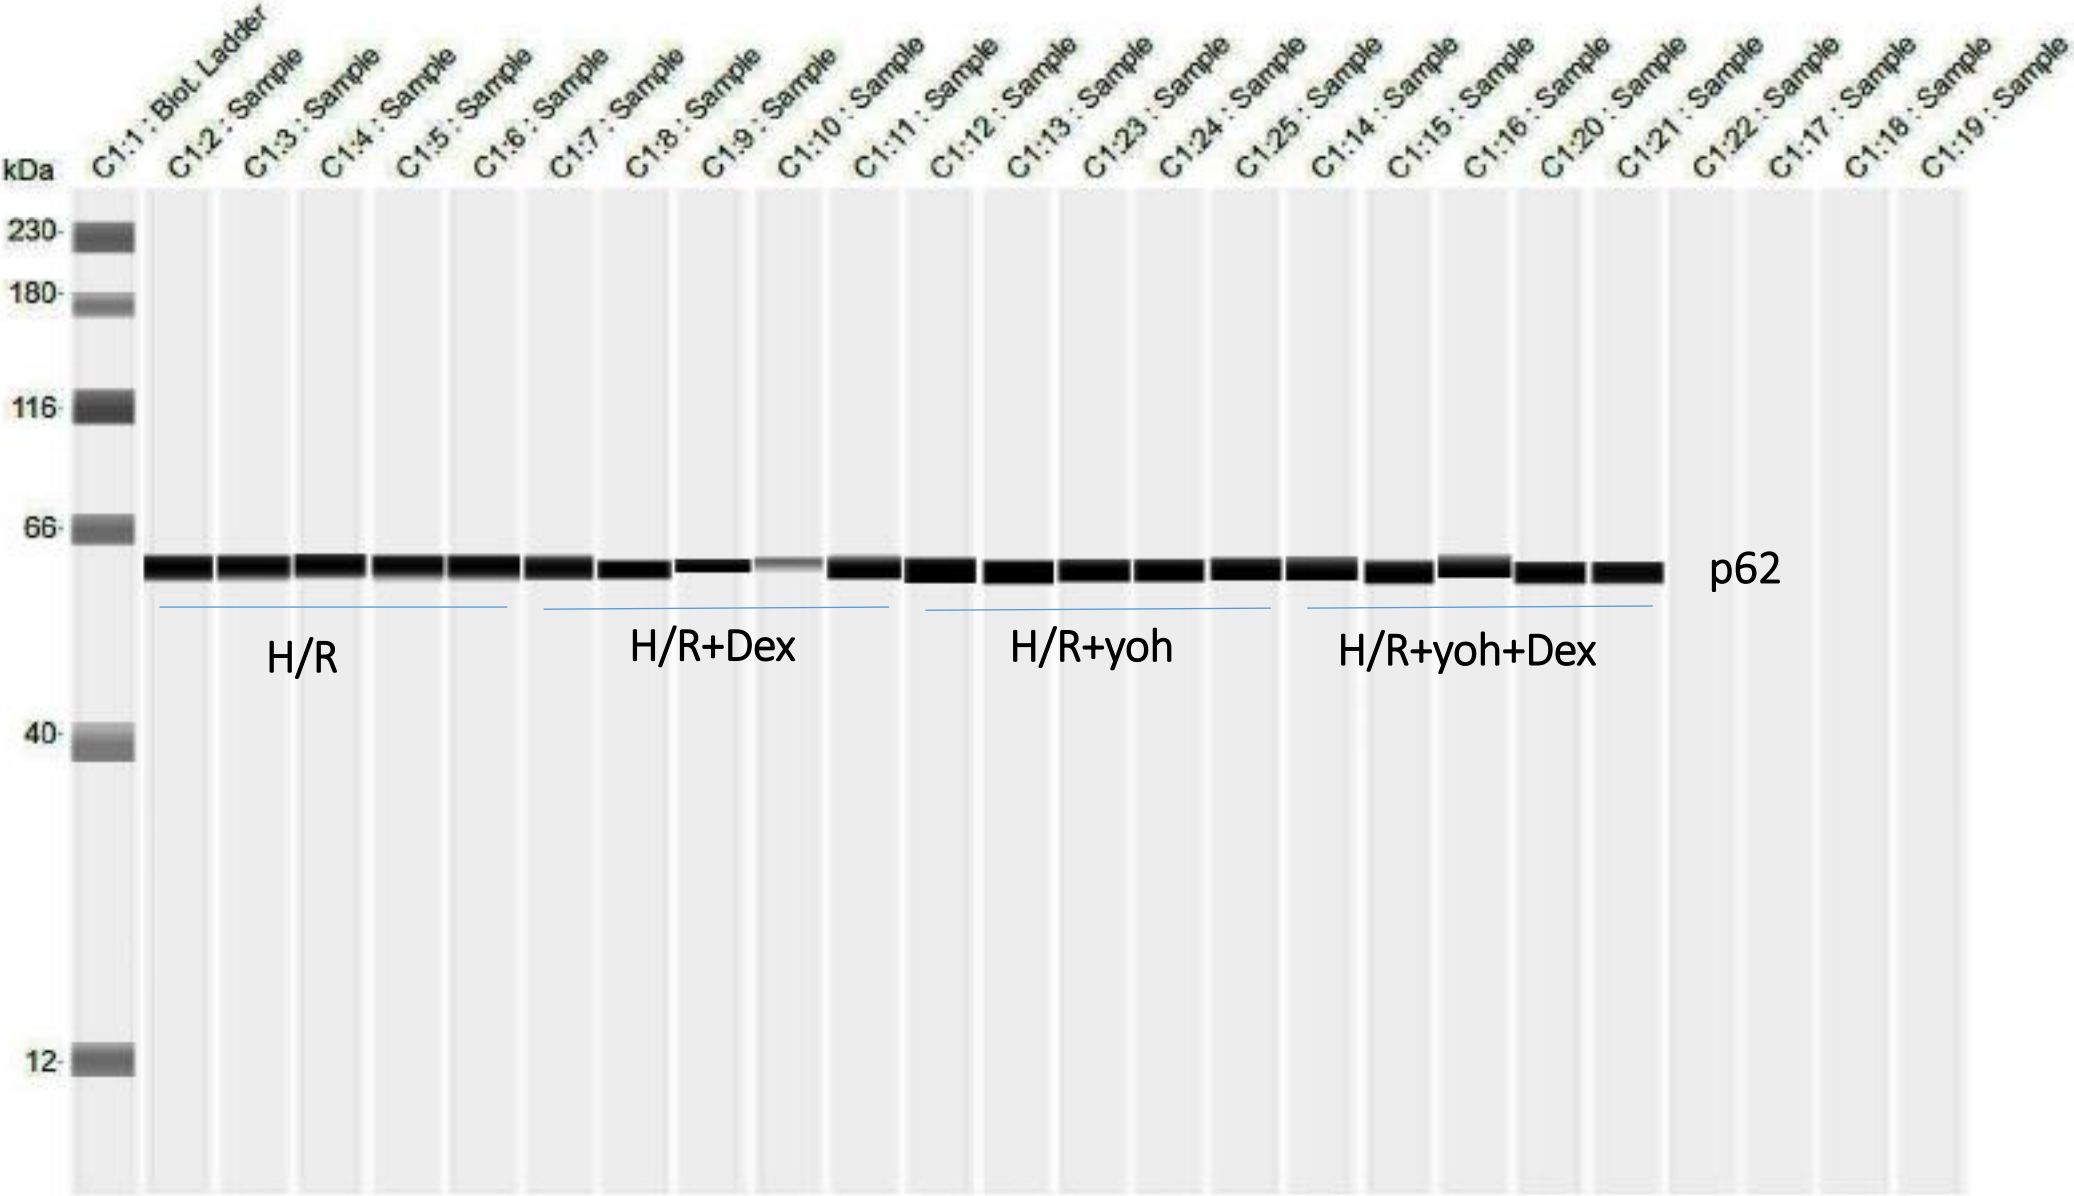

Fig.7G

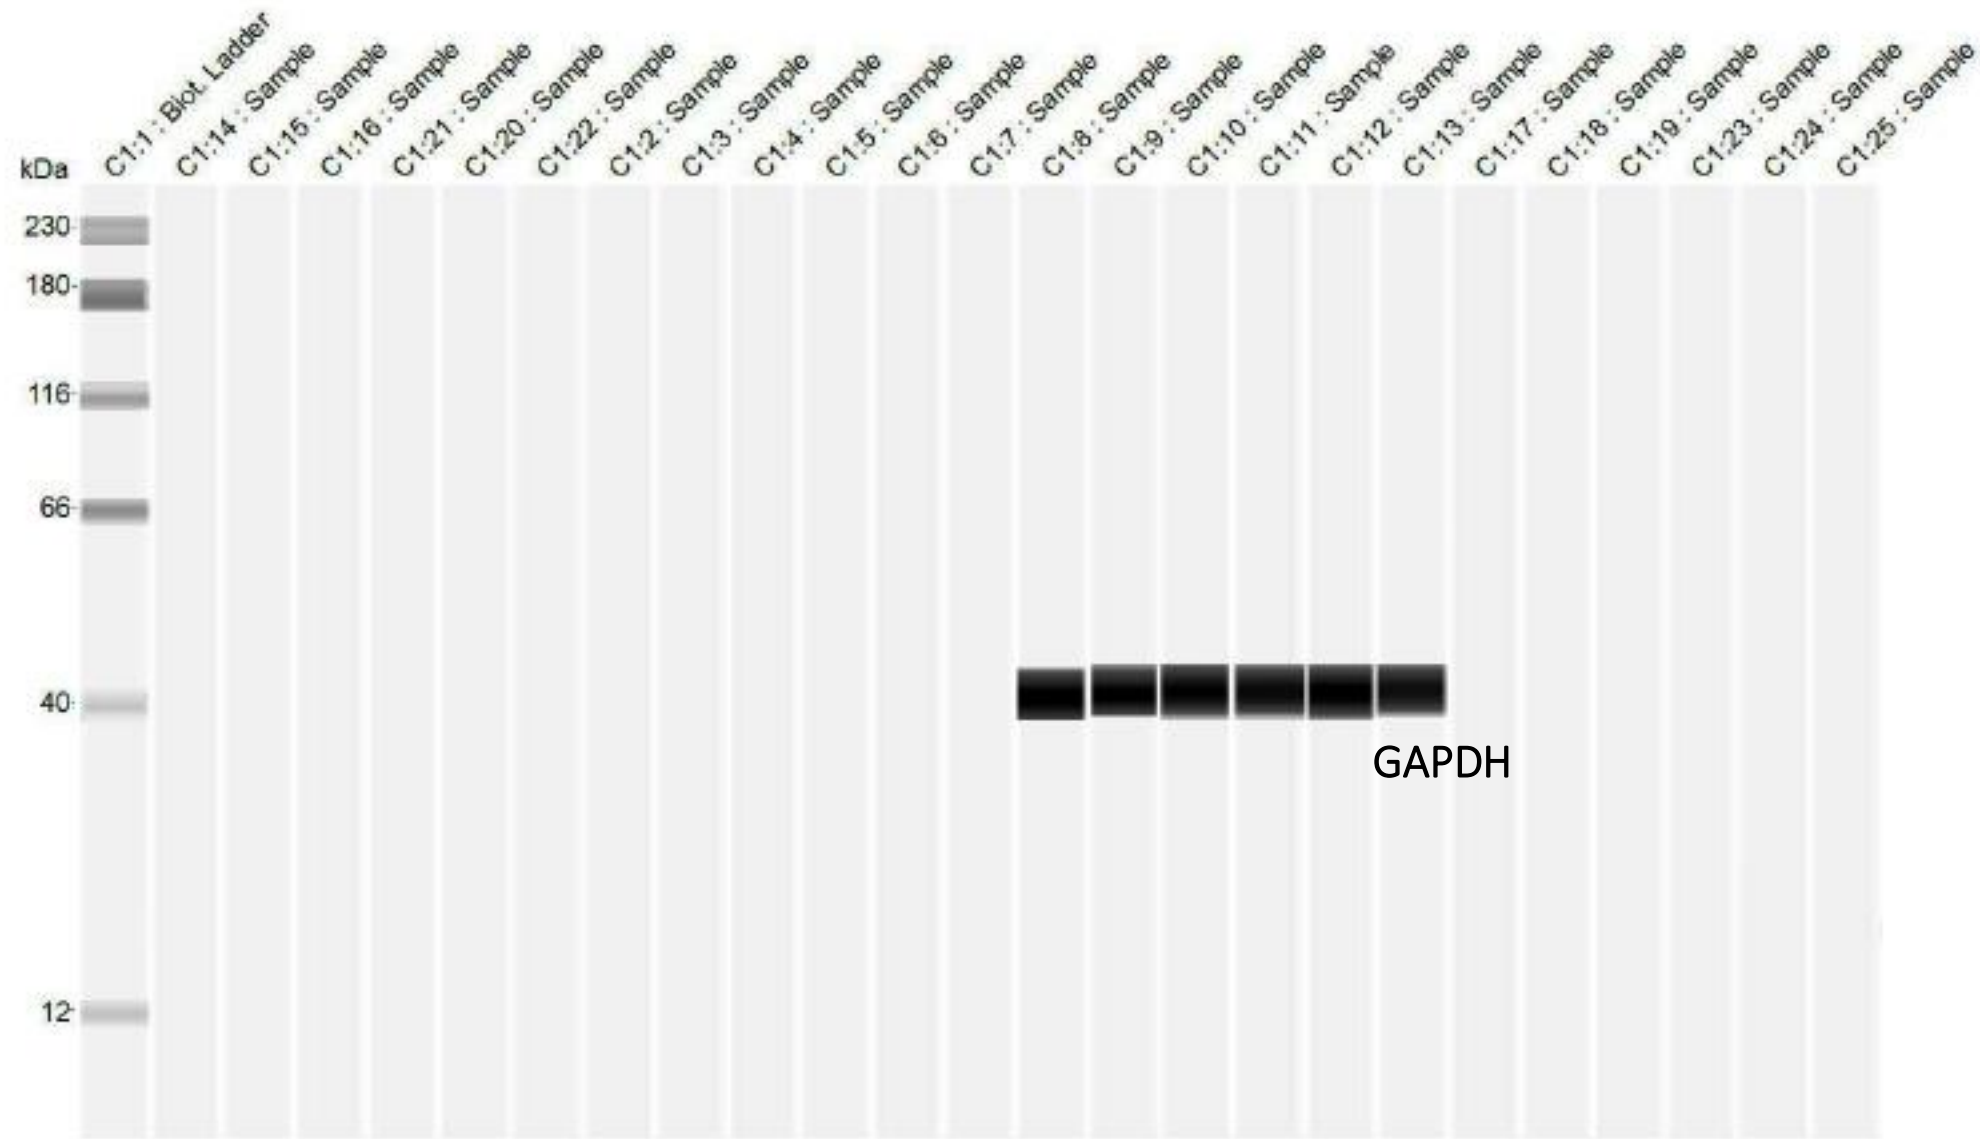

Fig.7G

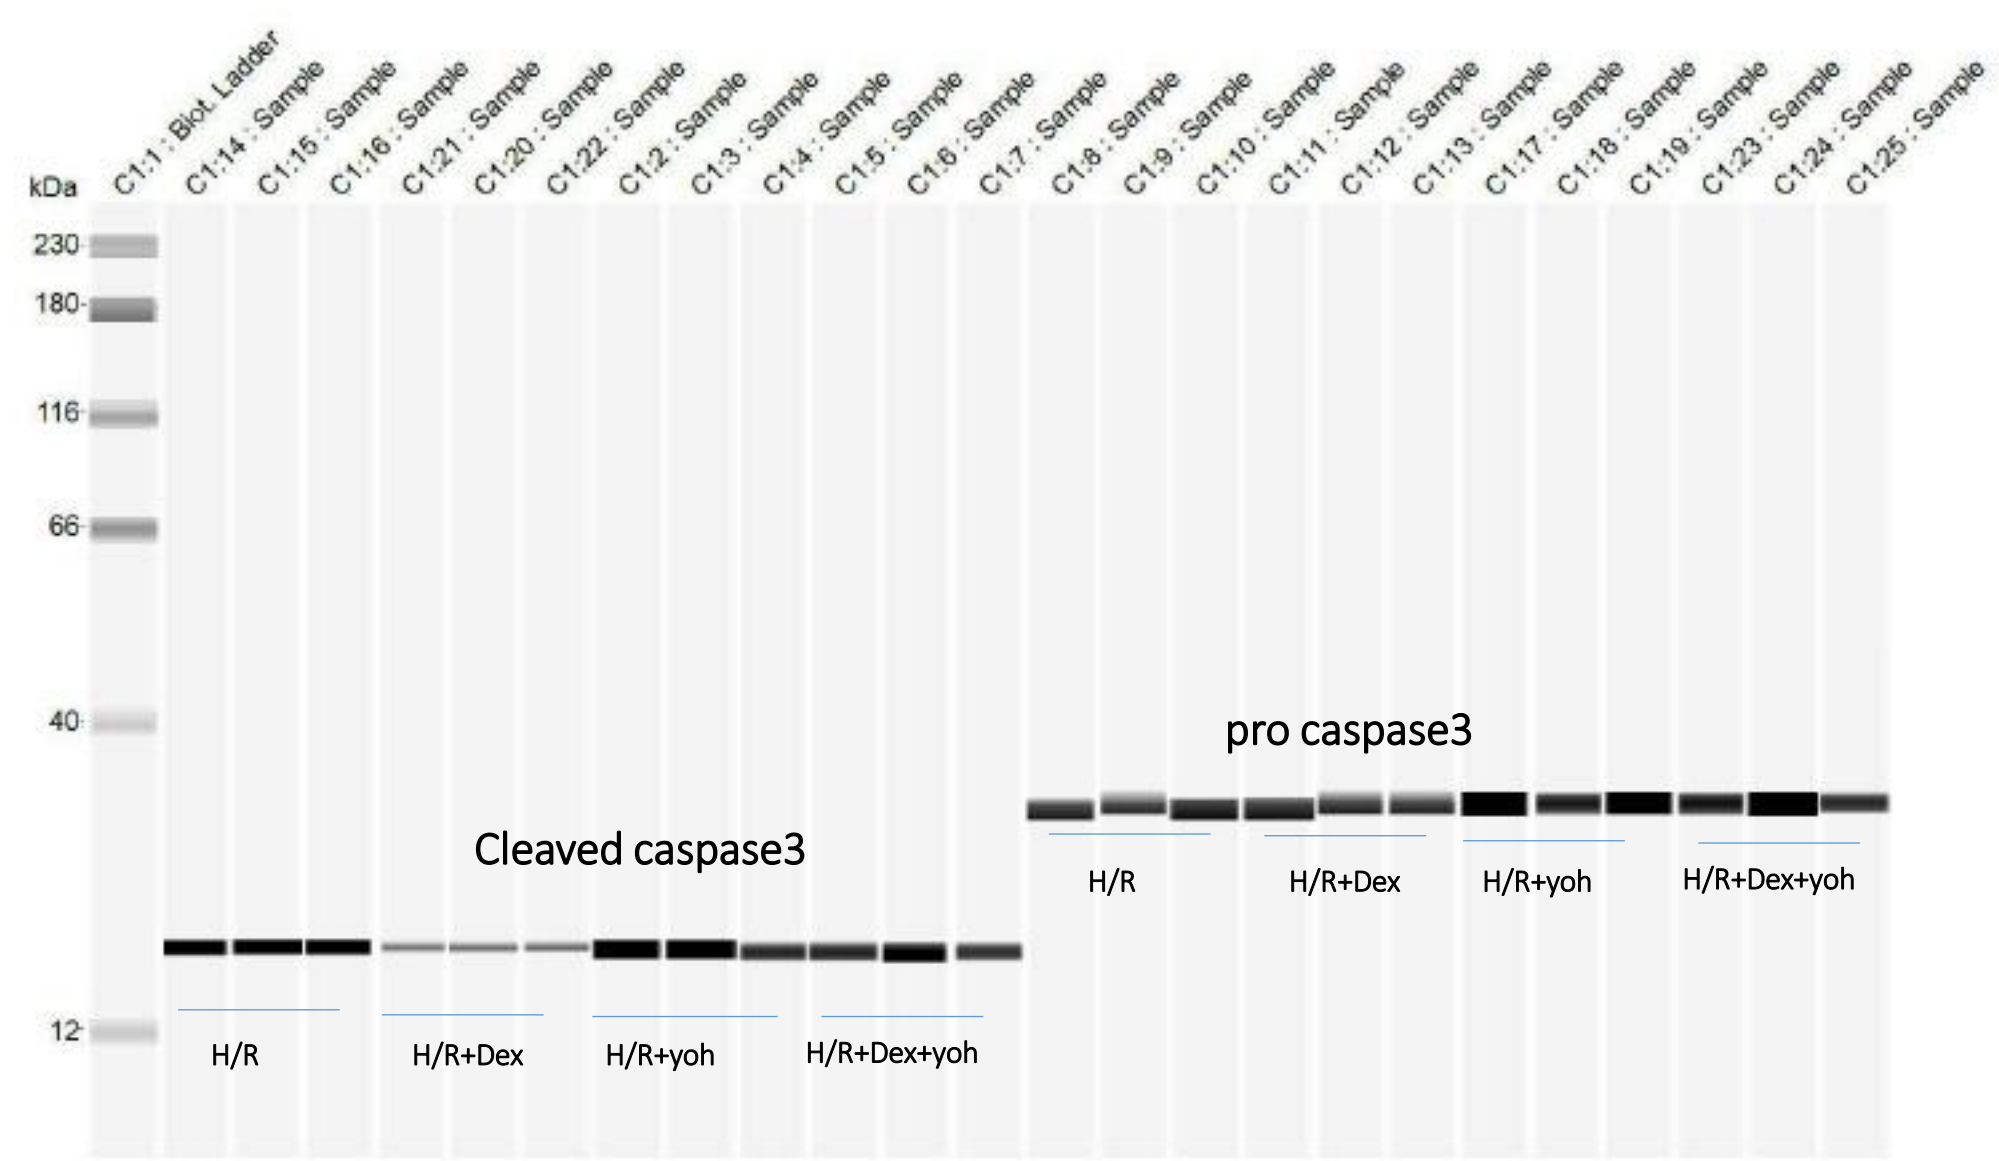

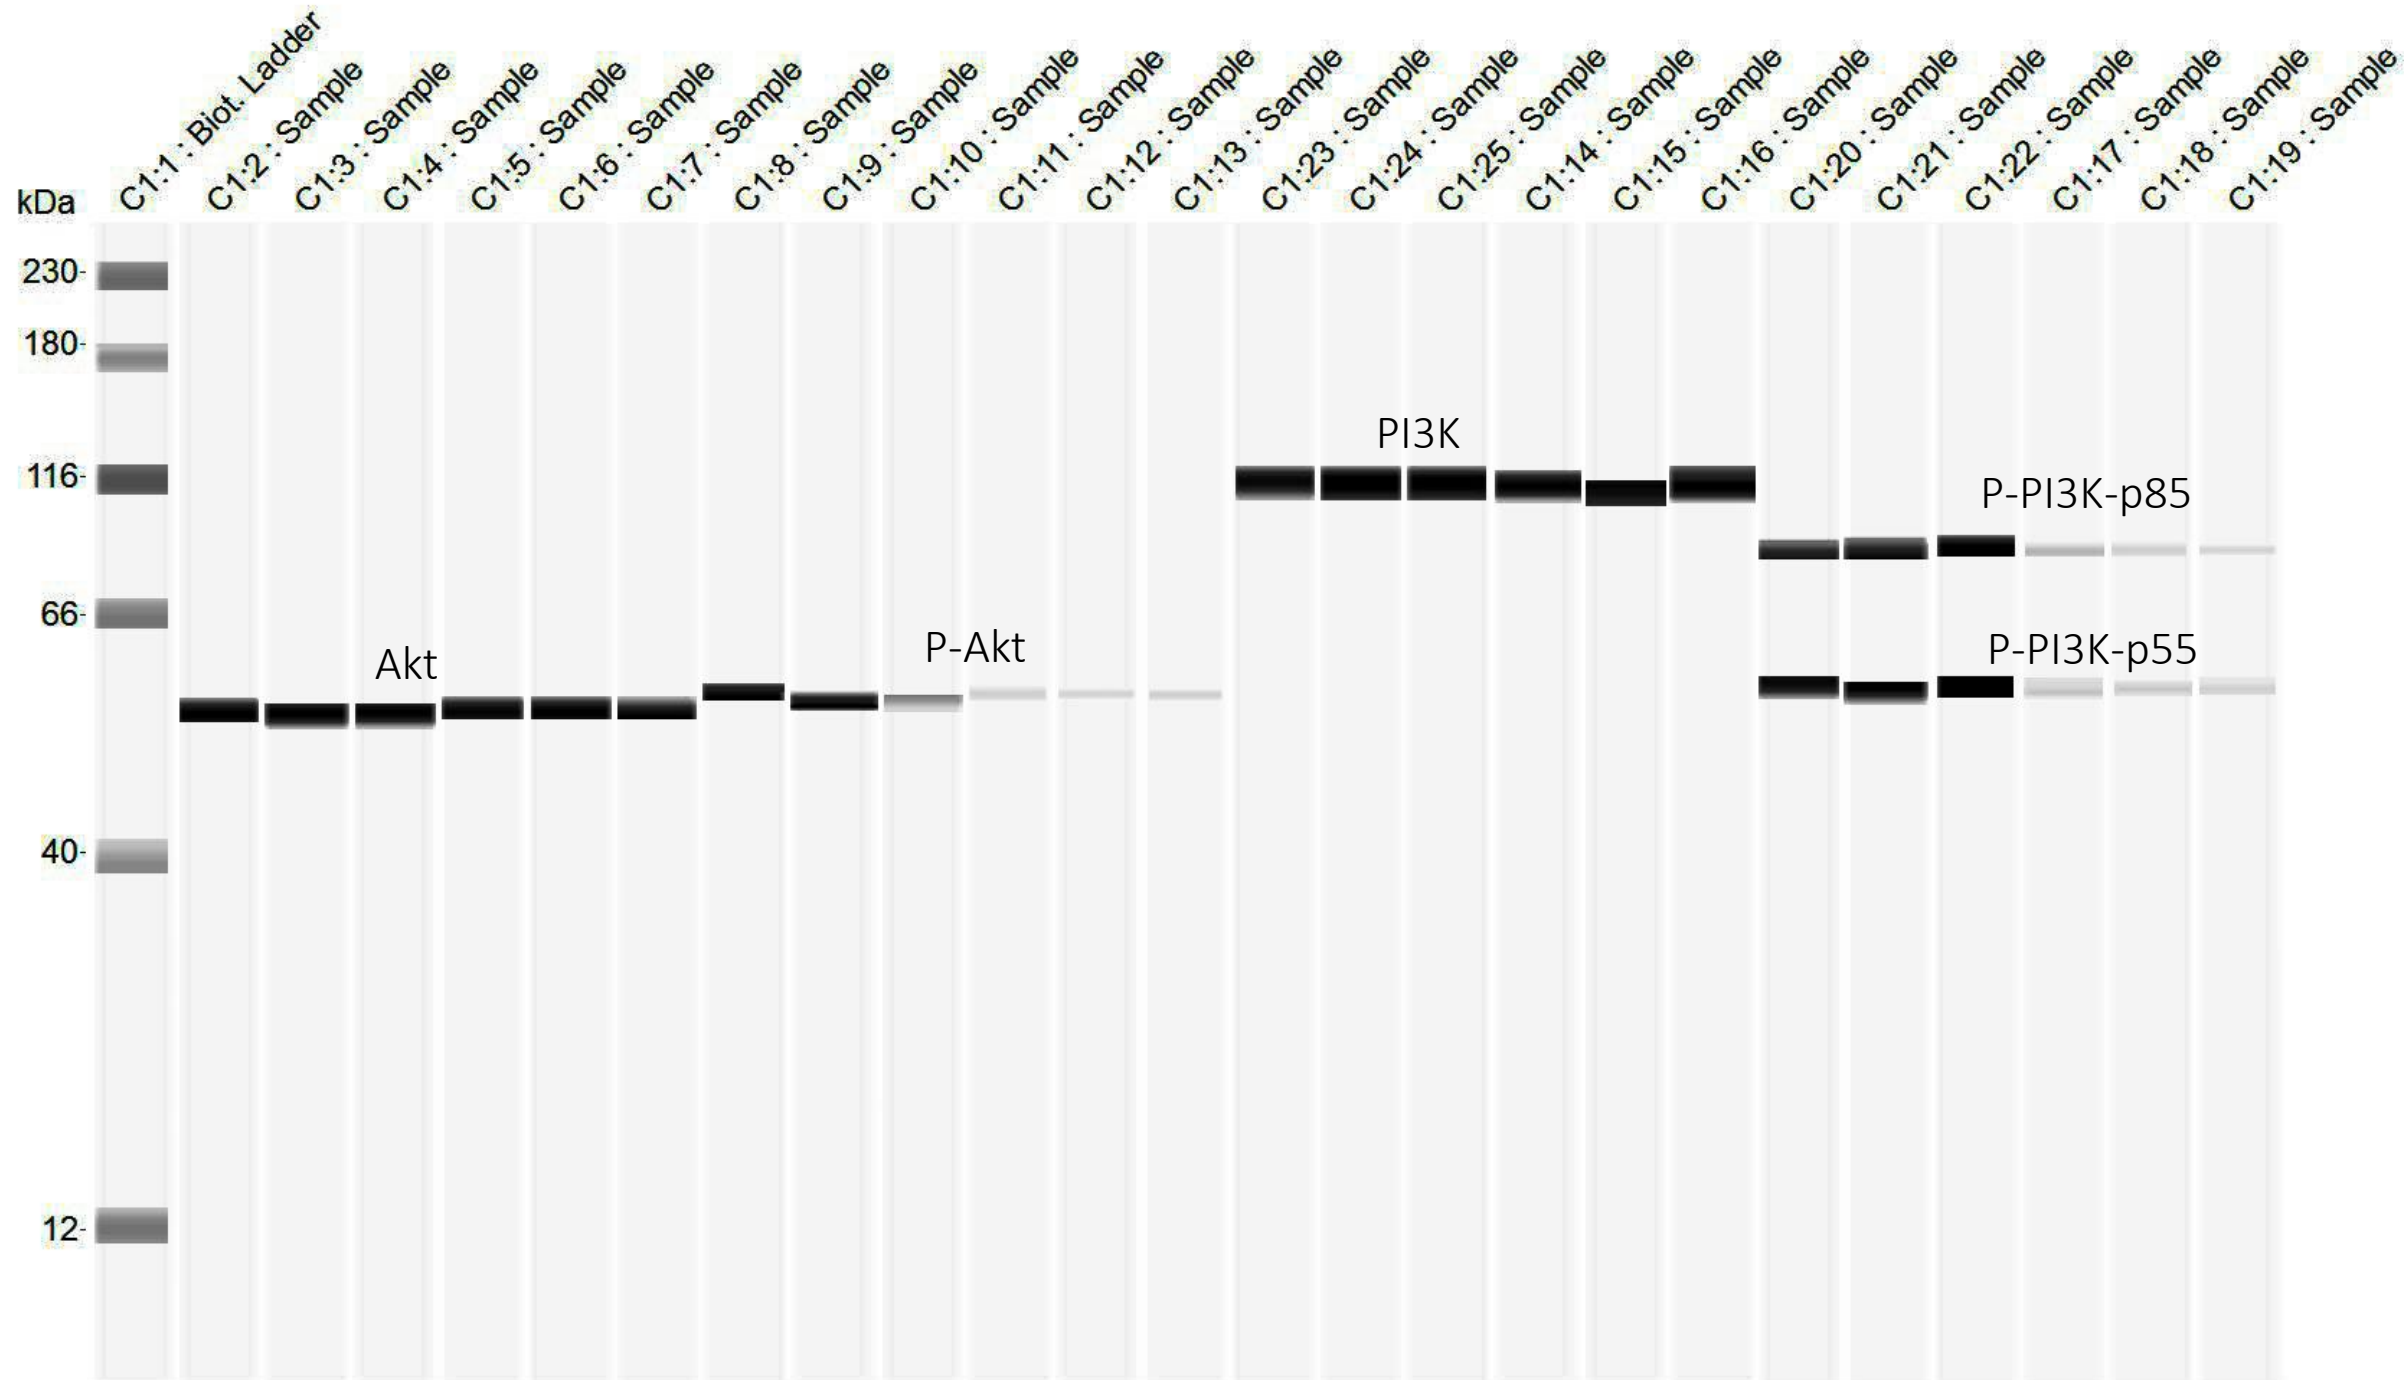



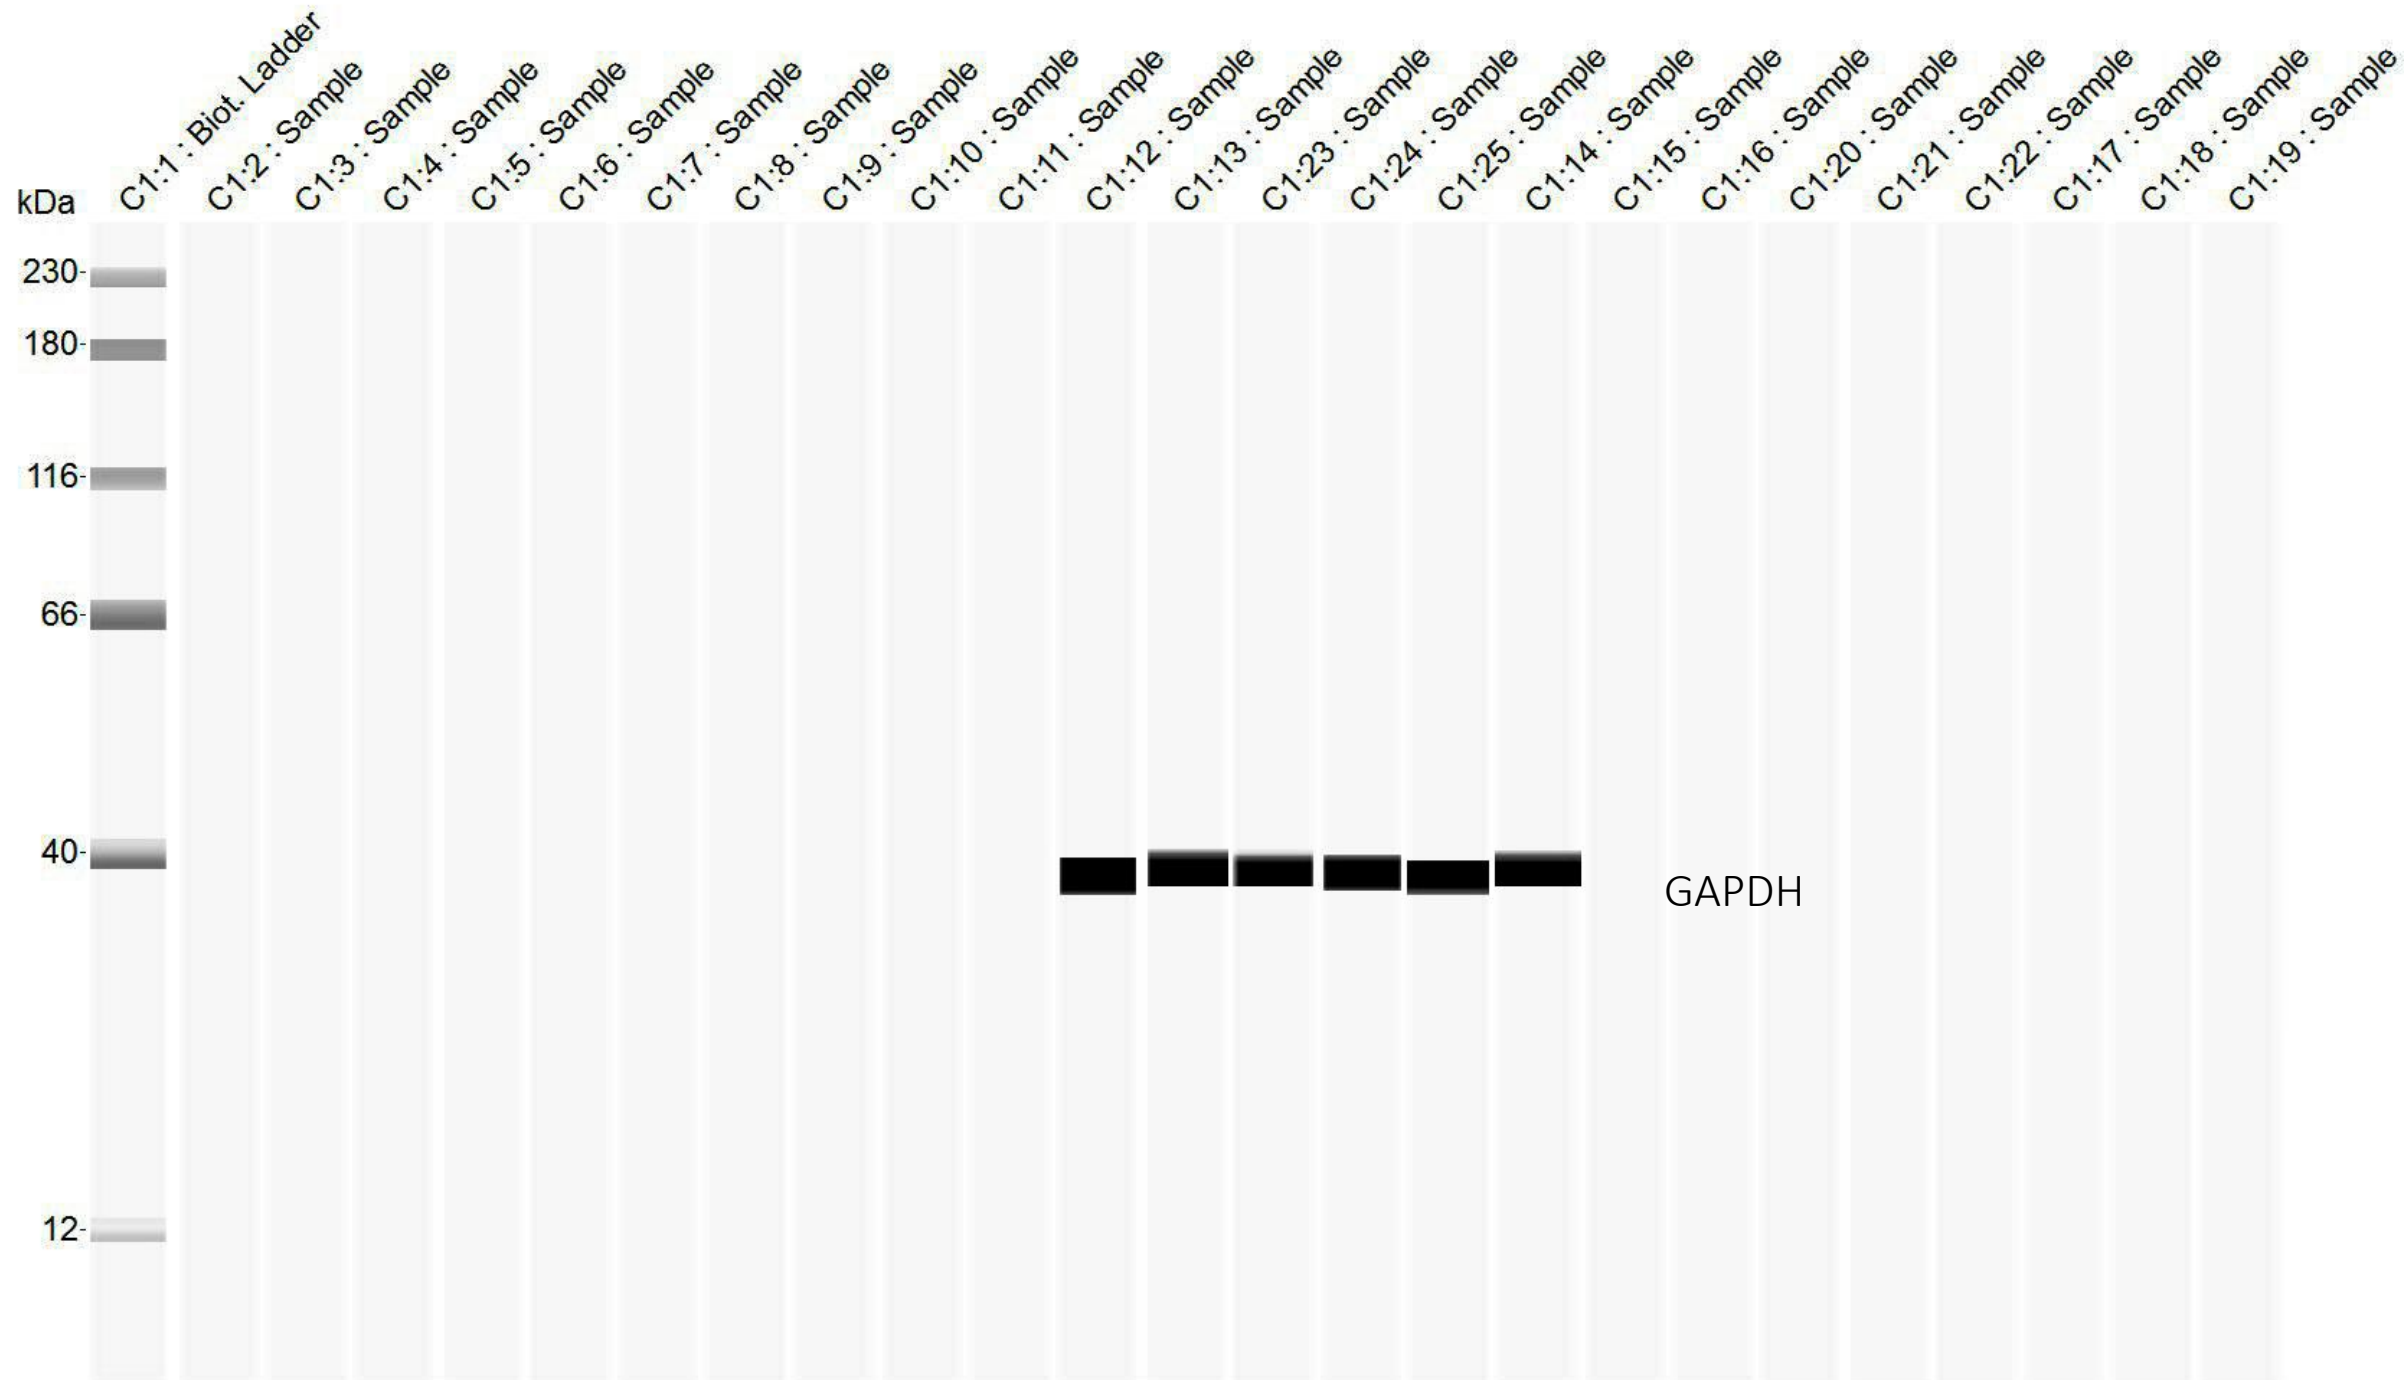

Supplement: Supplementary file [file 28109268]
